# Supplementary material
Source: PubMed Central journal article supplement (PMC10192046)
Supplement: NIHMS1885021-supplement-Supplementary_6.pdf [file NIHMS1885021-supplement-Supplementary_6.pdf]

Supporting Table 4

| Sample name | Protein                                           | Accession | Gene ID   | Mass kDa | Pep #  | Seq Cov (%) | NSAF    |
|-------------|---------------------------------------------------|-----------|-----------|----------|--------|-------------|---------|
| Scramble    | Interleukin enhancer-binding factor 2             | Q12905    | ILF2      | 43       | 18     | 58.00%      | 0.0189  |
|             | Interleukin enhancer-binding factor 3             | Q12906    | ILF3      | 95       | 41     | 60.00%      | 0.0177  |
|             | Non-POU domain-containing octamer-binding protein | Q15233    | NONO      | 54       | 14     | 43.00%      | 0.0151  |
|             | Heterogeneous nuclear ribonucleoprotein M         | P52272    | HNRNPM    | 78       | 26     | 47.00%      | 0.015   |
|             | 40S ribosomal protein S29                         | P62273    | RPS29     | 7        | 2      | 36.00%      | 0.0146  |
|             | 40S ribosomal protein S24                         | P62847    | RPS24     | 15       | 6      | 36.00%      | 0.0144  |
|             | 40S ribosomal protein S7                          | P62081    | RPS7      | 22       | 9      | 52.00%      | 0.0141  |
|             | 40S ribosomal protein S15a                        | P62244    | RPS15A    | 15       | 4      | 40.00%      | 0.0137  |
|             | 40S ribosomal protein S30                         | P62861    | FAU       | 7        | 3      | 20.00%      | 0.0116  |
|             | ATP-dependent RNA helicase A                      | Q08211    | DHX9      | 141      | 44     | 46.00%      | 0.0113  |
|             | 40S ribosomal protein S9                          | P46781    | RPS9      | 23       | 11     | 41.00%      | 0.0106  |
|             | Heterogeneous nuclear ribonucleoprotein A1        | P09651    | HNRNPA1   | 39       | 12     | 37.00%      | 0.00991 |
|             | Splicing factor, proline- and glutamine-rich      | P23246    | SFPQ      | 76       | 20     | 35.00%      | 0.00985 |
|             | 60S ribosomal protein L38                         | P63173    | RPL38     | 8        | 2      | 19.00%      | 0.00976 |
|             | Y-box-binding protein 1                           | P67809    | YBX1      | 36       | 12     | 64.00%      | 0.00969 |
|             | Elongation factor 1-alpha 1                       | P68104    | EEF1A1    | 50       | 11     | 34.00%      | 0.00916 |
|             | Histone H1.2                                      | P16403    | H1-2      | 21       | 9      | 32.00%      | 0.00898 |
|             | 40S ribosomal protein S4, X isoform               | P62701    | RPS4X     | 30       | 9      | 25.00%      | 0.00831 |
|             | Heterogeneous nuclear ribonucleoprotein Q         | O60506    | SYNCRIP   | 70       | 21     | 43.00%      | 0.00811 |
|             | 40S ribosomal protein S17                         | P08708    | RPS17     | 16       | 3      | 40.00%      | 0.00809 |
|             | Immunoglobulin kappa variable 2D-29               | A0A075B6S | IGKV2D-29 | 13       | 2      | 17.00%      | 0.00797 |
|             | 40S ribosomal protein S16                         | P62249    | RPS16     | 16       | 7      | 38.00%      | 0.00748 |
|             | 40S ribosomal protein S10                         | P46783    | RPS10     | 19       | 5      | 33.00%      | 0.00745 |
|             | 40S ribosomal protein S18                         | P62269    | RPS18     | 18       | 6      | 33.00%      | 0.00719 |
|             | Acetyl-CoA carboxylase 1                          | Q13085    | ACACA     | 266      | 76     | 43.00%      | 0.0071  |
|             | Heterogeneous nuclear ribonucleoproteins A2/B1    | P22626    | HNRNPA2B1 | 37       | 13     | 46.00%      | 0.00696 |
|             | Tubulin alpha-1B chain                            | P68363    | TUBA1B    | 50       | 12     | 43.00%      | 0.00696 |
|             | Tubulin beta chain                                | P07437    | TUBB      | 50       | 13     | 44.00%      | 0.00677 |
|             | Ras GTPase-activating protein-binding protein 1   | Q13283    | G3BP1     | 52       | 15     | 39.00%      | 0.00674 |
|             | Heterogeneous nuclear ribonucleoprotein D0        | Q14103    | HNRNPD    | 38       | 9      | 28.00%      | 0.00654 |
| Nucleolin   | P19338                                            | NCL       | 77        | 21       | 31.00% | 0.00654     |         |

|                                                                  |        |         |     |    |        |         |
|------------------------------------------------------------------|--------|---------|-----|----|--------|---------|
| Double-stranded RNA-binding protein Staufen homolog 1            | O95793 | STAU1   | 63  | 20 | 39.00% | 0.00639 |
| Insulin-like growth factor 2 mRNA-binding protein 1              | Q9NZI8 | IGF2BP1 | 63  | 15 | 35.00% | 0.00639 |
| 40S ribosomal protein S14                                        | P62263 | RPS14   | 16  | 5  | 39.00% | 0.00633 |
| Poly [ADP-ribose] polymerase 1                                   | P09874 | PARP1   | 113 | 33 | 40.00% | 0.0062  |
| 40S ribosomal protein S3                                         | P23396 | RPS3    | 27  | 7  | 39.00% | 0.00562 |
| 60S ribosomal protein L19                                        | P84098 | RPL19   | 23  | 4  | 14.00% | 0.00557 |
| Probable ATP-dependent RNA helicase DDX5                         | P17844 | DDX5    | 69  | 18 | 36.00% | 0.00534 |
| Histone H4                                                       | P62805 | H4C1    | 11  | 3  | 29.00% | 0.0053  |
| RNA-binding protein 3                                            | P98179 | RBM3    | 17  | 3  | 29.00% | 0.00522 |
| Interferon-induced, double-stranded RNA-activated protein kinase | P19525 | EIF2AK2 | 62  | 14 | 34.00% | 0.00521 |
| 60S ribosomal protein L23                                        | P62829 | RPL23   | 15  | 2  | 13.00% | 0.00488 |
| U2 small nuclear ribonucleoprotein A'                            | P09661 | SNRPA1  | 28  | 6  | 38.00% | 0.00482 |
| Heterogeneous nuclear ribonucleoprotein U                        | Q00839 | HNRNPU  | 91  | 19 | 28.00% | 0.0048  |
| 40S ribosomal protein S19                                        | P39019 | RPS19   | 16  | 5  | 23.00% | 0.00471 |
| 40S ribosomal protein S20                                        | P60866 | RPS20   | 13  | 2  | 19.00% | 0.00459 |
| Small nuclear ribonucleoprotein Sm D1                            | P62314 | SNRPD1  | 13  | 2  | 28.00% | 0.00459 |
| 40S ribosomal protein S13                                        | P62277 | RPS13   | 17  | 5  | 28.00% | 0.00452 |
| Heterogeneous nuclear ribonucleoprotein A/B                      | Q99729 | HNRNPAB | 36  | 6  | 21.00% | 0.00452 |
| 60S ribosomal protein L23a                                       | P62750 | RPL23A  | 18  | 4  | 22.00% | 0.00438 |
| 40S ribosomal protein S25                                        | P62851 | RPS25   | 14  | 3  | 16.00% | 0.00437 |
| 60S ribosomal protein L31                                        | P62899 | RPL31   | 14  | 3  | 26.00% | 0.00437 |
| Heterogeneous nuclear ribonucleoprotein A3                       | P51991 | HNRNPA3 | 40  | 10 | 27.00% | 0.00434 |
| Cancer-related nucleoside-triphosphatase                         | Q9BSD7 | NTPCR   | 21  | 4  | 29.00% | 0.00431 |
| 60S ribosomal protein L22                                        | P35268 | RPL22   | 15  | 4  | 32.00% | 0.00427 |
| Ras GTPase-activating protein-binding protein 2                  | Q9UN86 | G3BP2   | 54  | 6  | 20.00% | 0.00425 |
| Polypyrimidine tract-binding protein 1                           | P26599 | PTBP1   | 57  | 11 | 38.00% | 0.00412 |
| Heterogeneous nuclear ribonucleoprotein R                        | O43390 | HNRNPR  | 71  | 12 | 27.00% | 0.0041  |
| High mobility group protein B3                                   | O15347 | HMGB3   | 23  | 5  | 23.00% | 0.0041  |
| Glyceraldehyde-3-phosphate dehydrogenase                         | P04406 | GAPDH   | 36  | 8  | 30.00% | 0.00408 |
| Lupus La protein                                                 | P05455 | SSB     | 47  | 10 | 25.00% | 0.00402 |
| RNA transcription, translation and transport factor protein      | Q9Y224 | RTRAF   | 28  | 5  | 31.00% | 0.00392 |
| RNA-binding protein 14                                           | Q96PK6 | RBM14   | 69  | 14 | 29.00% | 0.00388 |
| Histone H1.10                                                    | Q92522 | H1-10   | 22  | 4  | 26.00% | 0.00385 |
| 40S ribosomal protein S6                                         | P62753 | RPS6    | 29  | 4  | 16.00% | 0.00384 |

|                                                            |             |         |     |    |        |         |
|------------------------------------------------------------|-------------|---------|-----|----|--------|---------|
| Far upstream element-binding protein 2                     | Q92945      | KHSRP   | 73  | 17 | 37.00% | 0.00384 |
| Developmentally-regulated GTP-binding protein 1            | Q9Y295      | DRG1    | 41  | 10 | 33.00% | 0.00372 |
| THO complex subunit 4                                      | Q86V81      | ALYREF  | 27  | 5  | 27.00% | 0.00372 |
| Zinc finger protein 346                                    | Q9UL40      | ZNF346  | 33  | 7  | 34.00% | 0.00372 |
| 60S ribosomal protein L17                                  | P18621      | RPL17   | 21  | 5  | 27.00% | 0.00371 |
| 60S ribosomal protein L27a                                 | P46776      | RPL27A  | 17  | 3  | 22.00% | 0.00369 |
| Plasminogen activator inhibitor 1 RNA-binding protein      | Q8NC51      | SERBP1  | 45  | 9  | 29.00% | 0.00368 |
| Small nuclear ribonucleoprotein G                          | P62308      | SNRPG   | 8   | 2  | 17.00% | 0.00359 |
| Ubiquitin-associated protein 2-like                        | Q14157      | UBAP2L  | 115 | 17 | 28.00% | 0.00352 |
| Probable dimethyladenosine transferase                     | Q9UNQ2      | DIMT1   | 35  | 7  | 30.00% | 0.00349 |
| 40S ribosomal protein S11                                  | P62280      | RPS11   | 18  | 3  | 12.00% | 0.00346 |
| Insulin-like growth factor 2 mRNA-binding protein 2        | Q9Y6M1      | IGF2BP2 | 66  | 12 | 28.00% | 0.00342 |
| Probable ATP-dependent RNA helicase DDX6                   | P26196      | DDX6    | 54  | 9  | 26.00% | 0.00339 |
| Heat shock cognate 71 kDa protein                          | P11142      | HSPA8   | 71  | 12 | 31.00% | 0.00338 |
| RNA-binding protein 4                                      | Q9BWF3      | RBM4    | 40  | 7  | 39.00% | 0.00338 |
| RNA-binding protein FUS                                    | P35637      | FUS     | 53  | 6  | 19.00% | 0.00338 |
| Heterogeneous nuclear ribonucleoprotein H                  | P31943      | HNRNPH1 | 49  | 8  | 29.00% | 0.00335 |
| Nuclear fragile X mental retardation-interacting protein 2 | Q7Z417      | NUFIP2  | 76  | 12 | 29.00% | 0.00334 |
| Y-box-binding protein 3                                    | P16989      | YBX3    | 40  | 8  | 55.00% | 0.0033  |
| 40S ribosomal protein S8                                   | P62241      | RPS8    | 24  | 3  | 20.00% | 0.00328 |
| Gem-associated protein 6                                   | Q8WXD5      | GEMIN6  | 19  | 3  | 23.00% | 0.00327 |
| 60S ribosomal protein L13                                  | P26373      | RPL13   | 24  | 4  | 21.00% | 0.00324 |
| Heat shock 70 kDa protein 1B                               | P0DMV9      | HSPA1B  | 70  | 13 | 31.00% | 0.0032  |
| Cold-inducible RNA-binding protein                         | Q14011      | CIRBP   | 19  | 4  | 33.00% | 0.00318 |
| Histone H2A type 2-C                                       | Q16777 (+1) | H2AC20  | 14  | 2  | 23.00% | 0.00318 |
| X-ray repair cross-complementing protein 6                 | P12956      | XRCC6   | 70  | 12 | 27.00% | 0.00314 |
| Heterogeneous nuclear ribonucleoprotein A0                 | Q13151      | HNRNPA0 | 31  | 6  | 27.00% | 0.00313 |
| Peptidyl-prolyl cis-trans isomerase NIMA-interacting 4     | Q9Y237      | PIN4    | 14  | 2  | 31.00% | 0.00313 |
| Multiple myeloma tumor-associated protein 2                | Q9BU76      | MMTAG2  | 29  | 6  | 25.00% | 0.00312 |
| 40S ribosomal protein S3a                                  | P61247      | RPS3A   | 30  | 5  | 24.00% | 0.0031  |
| Nucleolar protein 16                                       | Q9Y3C1      | NOP16   | 21  | 2  | 18.00% | 0.00307 |
| Coiled-coil domain-containing protein 124                  | Q96CT7      | CCDC124 | 26  | 3  | 15.00% | 0.00306 |
| Peptidyl-prolyl cis-trans isomerase FKBP3                  | Q00688      | FKBP3   | 25  | 4  | 21.00% | 0.00305 |
| Heterogeneous nuclear ribonucleoprotein L                  | P14866      | HNRNPL  | 64  | 9  | 29.00% | 0.00301 |

|                                                                      |        |         |     |    |        |         |
|----------------------------------------------------------------------|--------|---------|-----|----|--------|---------|
| Small nuclear ribonucleoprotein E                                    | P62304 | SNRPE   | 11  | 2  | 17.00% | 0.00297 |
| ATP-dependent RNA helicase DDX3X                                     | O00571 | DDX3X   | 73  | 10 | 22.00% | 0.00289 |
| Caprin-1                                                             | Q14444 | CAPRIN1 | 78  | 10 | 21.00% | 0.00289 |
| Eukaryotic translation initiation factor 2 subunit 2                 | P20042 | EIF2S2  | 38  | 5  | 23.00% | 0.00287 |
| 60S ribosomal protein L9                                             | P32969 | RPL9    | 22  | 4  | 23.00% | 0.00285 |
| ATP-dependent DNA/RNA helicase DHX36                                 | Q9H2U1 | DHX36   | 115 | 18 | 23.00% | 0.00285 |
| 40S ribosomal protein S15                                            | P62841 | RPS15   | 17  | 2  | 32.00% | 0.00283 |
| 60S ribosomal protein L26                                            | P61254 | RPL26   | 17  | 3  | 14.00% | 0.00283 |
| Probable ATP-dependent RNA helicase DDX17                            | Q92841 | DDX17   | 80  | 14 | 29.00% | 0.00281 |
| U1 small nuclear ribonucleoprotein 70 kDa                            | P08621 | SNRNP70 | 52  | 6  | 21.00% | 0.00281 |
| 40S ribosomal protein S2                                             | P15880 | RPS2    | 31  | 4  | 18.00% | 0.0028  |
| Survival motor neuron protein                                        | Q16637 | SMN1    | 32  | 5  | 23.00% | 0.00279 |
| Endothelial differentiation-related factor 1                         | O60869 | EDF1    | 16  | 3  | 24.00% | 0.00277 |
| Vigilin                                                              | Q00341 | HDLBP   | 141 | 22 | 26.00% | 0.00269 |
| 40S ribosomal protein S5                                             | P46782 | RPS5    | 23  | 2  | 19.00% | 0.00268 |
| RNA-binding protein Musashi homolog 1                                | O43347 | MSI1    | 39  | 7  | 34.00% | 0.00264 |
| Far upstream element-binding protein 3                               | Q96I24 | FUBP3   | 62  | 10 | 28.00% | 0.00263 |
| Fructose-bisphosphate aldolase A                                     | P04075 | ALDOA   | 39  | 6  | 26.00% | 0.00263 |
| High mobility group protein B2                                       | P26583 | HMGB2   | 24  | 3  | 18.00% | 0.00261 |
| Eukaryotic translation initiation factor 2 subunit 1                 | P05198 | EIF2S1  | 36  | 6  | 18.00% | 0.0026  |
| DNA-(apurinic or apyrimidinic site) endonuclease                     | P27695 | APEX1   | 36  | 5  | 23.00% | 0.00258 |
| RNA-binding protein 39                                               | Q14498 | RBM39   | 59  | 8  | 18.00% | 0.00258 |
| 60S ribosomal protein L10                                            | P27635 | RPL10   | 25  | 2  | 6.50%  | 0.00255 |
| Staphylococcal nuclease domain-containing protein 1                  | Q7KZF4 | SND1    | 102 | 14 | 26.00% | 0.00255 |
| Flap endonuclease 1                                                  | P39748 | FEN1    | 43  | 5  | 21.00% | 0.00252 |
| Serine/arginine-rich splicing factor 3                               | P84103 | SRSF3   | 19  | 3  | 21.00% | 0.0025  |
| tRNA (adenine(58)-N(1))-methyltransferase non-catalytic subunit TRM6 | Q9UJA5 | TRMT6   | 56  | 9  | 32.00% | 0.00247 |
| RNA-binding motif protein, X chromosome                              | P38159 | RBMX    | 42  | 7  | 22.00% | 0.00245 |
| Nucleolar RNA helicase 2                                             | Q9NR30 | DDX21   | 87  | 13 | 22.00% | 0.00244 |
| Fragile X mental retardation syndrome-related protein 1              | P51114 | FXR1    | 70  | 9  | 25.00% | 0.00242 |
| 60S acidic ribosomal protein P2                                      | P05387 | RPLP2   | 12  | 2  | 45.00% | 0.00238 |
| Probable ATP-dependent RNA helicase DDX20                            | Q9UHI6 | DDX20   | 92  | 12 | 26.00% | 0.00232 |
| Heterogeneous nuclear ribonucleoprotein F                            | P52597 | HNRNPF  | 46  | 5  | 24.00% | 0.0023  |
| Matrin-3                                                             | P43243 | MATR3   | 95  | 11 | 18.00% | 0.00226 |

|                                                            |        |          |     |    |        |         |
|------------------------------------------------------------|--------|----------|-----|----|--------|---------|
| 60S ribosomal protein L22-like 1                           | Q6P5R6 | RPL22L1  | 15  | 2  | 30.00% | 0.00224 |
| Double-stranded RNA-specific adenosine deaminase           | P55265 | ADAR     | 136 | 16 | 20.00% | 0.00223 |
| 60S ribosomal protein L35                                  | P42766 | RPL35    | 15  | 2  | 19.00% | 0.00222 |
| Uncharacterized protein C11orf98                           | E9PRG8 | C11orf98 | 14  | 2  | 22.00% | 0.00222 |
| 60S ribosomal protein L18                                  | Q07020 | RPL18    | 22  | 3  | 20.00% | 0.00218 |
| Insulin-like growth factor 2 mRNA-binding protein 3        | O00425 | IGF2BP3  | 64  | 6  | 19.00% | 0.00212 |
| RNA-binding protein with multiple splicing                 | Q93062 | RBPMS    | 22  | 2  | 20.00% | 0.00209 |
| RNA-binding protein Musashi homolog 2                      | Q96DH6 | MSI2     | 35  | 4  | 17.00% | 0.00208 |
| X-ray repair cross-complementing protein 5                 | P13010 | XRCC5    | 83  | 7  | 16.00% | 0.00205 |
| ATP-dependent RNA helicase DDX1                            | Q92499 | DDX1     | 82  | 10 | 20.00% | 0.00203 |
| Ribonucleoprotein PTB-binding 1                            | Q8IY67 | RAVER1   | 64  | 6  | 19.00% | 0.00203 |
| Signal recognition particle 14 kDa protein                 | P37108 | SRP14    | 15  | 2  | 21.00% | 0.00201 |
| 60S ribosomal protein L28                                  | P46779 | RPL28    | 16  | 2  | 16.00% | 0.00199 |
| Zinc finger CCCH-type antiviral protein 1                  | Q7Z2W4 | ZC3HAV1  | 101 | 10 | 19.00% | 0.00197 |
| U1 small nuclear ribonucleoprotein A                       | P09012 | SNRPA    | 31  | 2  | 11.00% | 0.00194 |
| Splicing factor 1                                          | Q15637 | SF1      | 68  | 9  | 22.00% | 0.00192 |
| Zinc finger CCCH domain-containing protein 15              | Q8WU90 | ZC3H15   | 49  | 5  | 19.00% | 0.00192 |
| 40S ribosomal protein S23                                  | P62266 | RPS23    | 16  | 2  | 16.00% | 0.00191 |
| RNA 3'-terminal phosphate cyclase                          | O00442 | RTCA     | 39  | 5  | 18.00% | 0.00187 |
| Nucleophosmin                                              | P06748 | NPM1     | 33  | 2  | 17.00% | 0.00186 |
| Pseudouridylate synthase 7 homolog                         | Q96PZ0 | PUS7     | 75  | 9  | 23.00% | 0.00186 |
| Decreased expression in renal and prostate cancer protein  | P0CG12 | DERPC    | 51  | 6  | 19.00% | 0.00182 |
| DNA-directed RNA polymerases I, II, and III subunit RPABC3 | P52434 | POLR2H   | 17  | 2  | 22.00% | 0.00182 |
| Nucleolysin TIAR                                           | Q01085 | TIAL1    | 42  | 5  | 17.00% | 0.00182 |
| U2 small nuclear ribonucleoprotein B''                     | P08579 | SNRPB2   | 25  | 3  | 17.00% | 0.00182 |
| DNA topoisomerase 1                                        | P11387 | TOP1     | 91  | 9  | 16.00% | 0.00179 |
| Zinc finger RNA-binding protein                            | Q96KR1 | ZFR      | 117 | 12 | 18.00% | 0.00178 |
| Guanine nucleotide-binding protein-like 3                  | Q9BVP2 | GNL3     | 62  | 7  | 19.00% | 0.00174 |
| 60S ribosomal protein L29                                  | P47914 | RPL29    | 18  | 2  | 14.00% | 0.00172 |
| Gem-associated protein 5                                   | Q8TEQ6 | GEMIN5   | 169 | 15 | 16.00% | 0.00172 |
| Protein PRRC2A                                             | P48634 | PRRC2A   | 229 | 24 | 20.00% | 0.00171 |
| Nucleolar protein of 40 kDa                                | Q9NP64 | ZCCHC17  | 28  | 2  | 9.10%  | 0.0017  |
| BTB/POZ domain-containing protein KCTD12                   | Q96CX2 | KCTD12   | 36  | 3  | 11.00% | 0.00168 |
| Gem-associated protein 4                                   | P57678 | GEMIN4   | 120 | 13 | 19.00% | 0.00168 |

|                                                                     |        |         |     |    |        |         |
|---------------------------------------------------------------------|--------|---------|-----|----|--------|---------|
| Ribosomal RNA small subunit methyltransferase NEP1                  | Q92979 | EMG1    | 27  | 3  | 15.00% | 0.00168 |
| Mitotic checkpoint protein BUB3                                     | O43684 | BUB3    | 37  | 4  | 17.00% | 0.00167 |
| 60S ribosomal protein L12                                           | P30050 | RPL12   | 18  | 2  | 19.00% | 0.00166 |
| Ataxin-2-like protein                                               | Q8WWM7 | ATXN2L  | 113 | 11 | 16.00% | 0.00165 |
| Krueppel-like factor 16                                             | Q9BXX1 | KLF16   | 25  | 2  | 17.00% | 0.00163 |
| Polymerase delta-interacting protein 3                              | Q9BY77 | POLDIP3 | 46  | 5  | 21.00% | 0.00162 |
| RNA-splicing ligase RtcB homolog                                    | Q9Y310 | RTCB    | 55  | 4  | 9.70%  | 0.00162 |
| 60S ribosomal protein L4                                            | P36578 | RPL4    | 48  | 3  | 11.00% | 0.0016  |
| Protein quaking                                                     | Q96PU8 | QKI     | 38  | 2  | 7.30%  | 0.0016  |
| 28S rRNA (cytosine-C(5))-methyltransferase                          | Q96P11 | NSUN5   | 47  | 4  | 13.00% | 0.00159 |
| Alpha-enolase                                                       | P06733 | ENO1    | 47  | 4  | 13.00% | 0.00157 |
| Pre-mRNA-splicing factor ATP-dependent RNA helicase DHX15           | O43143 | DHX15   | 91  | 8  | 11.00% | 0.00155 |
| Nuclear RNA export factor 1                                         | Q9UBU9 | NXF1    | 70  | 6  | 13.00% | 0.00154 |
| 60S ribosomal protein L11                                           | P62913 | RPL11   | 20  | 2  | 13.00% | 0.00153 |
| Nucleolar GTP-binding protein 1                                     | Q9BZE4 | GTPBP4  | 74  | 7  | 13.00% | 0.00151 |
| Far upstream element-binding protein 1                              | Q96AE4 | FUBP1   | 68  | 7  | 20.00% | 0.00148 |
| Heterogeneous nuclear ribonucleoprotein K                           | P61978 | HNRNPK  | 51  | 5  | 19.00% | 0.00147 |
| RNA-binding protein EWS                                             | Q01844 | EWSR1   | 68  | 4  | 10.00% | 0.00146 |
| Double-stranded RNA-binding protein Staufien homolog 2              | Q9NUL3 | STAU2   | 63  | 6  | 16.00% | 0.00144 |
| Creatine kinase B-type                                              | P12277 | CKB     | 43  | 3  | 14.00% | 0.00143 |
| Protein LSM14 homolog B                                             | Q9BX40 | LSM14B  | 42  | 4  | 18.00% | 0.00142 |
| RNA cytosine C(5)-methyltransferase NSUN2                           | Q08J23 | NSUN2   | 86  | 6  | 13.00% | 0.00142 |
| tRNA (adenine(58)-N(1))-methyltransferase catalytic subunit TRMT61A | Q96FX7 | TRMT61A | 31  | 2  | 15.00% | 0.00142 |
| CUGBP Elav-like family member 1                                     | Q92879 | CELF1   | 52  | 5  | 11.00% | 0.00141 |
| 40S ribosomal protein SA                                            | P08865 | RPSA    | 33  | 3  | 14.00% | 0.00139 |
| Ribosomal L1 domain-containing protein 1                            | O76021 | RSL1D1  | 55  | 5  | 18.00% | 0.00139 |
| DNA-3-methyladenine glycosylase                                     | P29372 | MPG     | 33  | 3  | 15.00% | 0.00137 |
| Transgelin-2                                                        | P37802 | TAGLN2  | 22  | 2  | 15.00% | 0.00137 |
| 60S ribosomal protein L15                                           | P61313 | RPL15   | 24  | 2  | 11.00% | 0.00134 |
| Ankyrin repeat and KH domain-containing protein 1                   | Q8IWZ3 | ANKHD1  | 269 | 22 | 14.00% | 0.00134 |
| Replication protein A 70 kDa DNA-binding subunit                    | P27694 | RPA1    | 68  | 5  | 12.00% | 0.00133 |
| Protein FAM98A                                                      | Q8NCA5 | FAM98A  | 55  | 4  | 19.00% | 0.00132 |
| Paraspeckle component 1                                             | Q8WXF1 | PSPC1   | 59  | 4  | 15.00% | 0.00131 |
| Heterogeneous nuclear ribonucleoprotein D-like                      | O14979 | HNRNPDL | 46  | 4  | 14.00% | 0.0013  |

|                                                              |        |         |     |    |        |         |
|--------------------------------------------------------------|--------|---------|-----|----|--------|---------|
| Synaptic functional regulator FMR1                           | Q06787 | FMR1    | 71  | 5  | 11.00% | 0.0013  |
| Polyadenylate-binding protein 1                              | P11940 | PABPC1  | 71  | 5  | 10.00% | 0.00129 |
| rRNA 2'-O-methyltransferase fibrillarin                      | P22087 | FBL     | 34  | 3  | 14.00% | 0.00128 |
| Protein argonaute-2                                          | Q9UKV8 | AGO2    | 97  | 7  | 10.00% | 0.00127 |
| Peptidyl-prolyl cis-trans isomerase B                        | P23284 | PPIB    | 24  | 2  | 10.00% | 0.00126 |
| Retinitis pigmentosa 9 protein                               | Q8TA86 | RP9     | 26  | 2  | 10.00% | 0.00124 |
| Tubulin beta-4B chain                                        | P68371 | TUBB4B  | 50  | 3  | 38.00% | 0.00123 |
| Fragile X mental retardation syndrome-related protein 2      | P51116 | FXR2    | 74  | 6  | 17.00% | 0.00122 |
| G patch domain-containing protein 4                          | Q5T310 | GPATCH4 | 50  | 4  | 16.00% | 0.00122 |
| Pre-mRNA-splicing factor SPF27                               | O75934 | BCAS2   | 26  | 2  | 19.00% | 0.00121 |
| Cleavage and polyadenylation specificity factor subunit 5    | O43809 | NUDT21  | 26  | 2  | 15.00% | 0.0012  |
| DNA-directed RNA polymerases I and III subunit RPAC1         | O15160 | POLR1C  | 39  | 3  | 12.00% | 0.00118 |
| RNA-binding protein 4B                                       | Q9BQ04 | RBM4B   | 40  | 3  | 34.00% | 0.00114 |
| ATP-binding cassette sub-family F member 1                   | Q8NE71 | ABCF1   | 96  | 7  | 9.80%  | 0.00113 |
| Protein PRRC2C                                               | Q9Y520 | PRRC2C  | 317 | 20 | 14.00% | 0.00113 |
| DNA-dependent protein kinase catalytic subunit               | P78527 | PRKDC   | 469 | 32 | 11.00% | 0.00112 |
| Poly(rC)-binding protein 2                                   | Q15366 | PCBP2   | 39  | 3  | 12.00% | 0.00112 |
| RISC-loading complex subunit TARBP2                          | Q15633 | TARBP2  | 39  | 3  | 9.60%  | 0.00112 |
| Eukaryotic translation initiation factor 4E type 2           | O60573 | EIF4E2  | 28  | 2  | 9.80%  | 0.00111 |
| 60S ribosomal protein L7                                     | P18124 | RPL7    | 29  | 2  | 10.00% | 0.0011  |
| Probable ATP-dependent RNA helicase DDX41                    | Q9UJV9 | DDX41   | 70  | 5  | 8.70%  | 0.0011  |
| Homeobox protein Hox-B9                                      | P17482 | HOXB9   | 28  | 2  | 9.20%  | 0.00109 |
| Cell growth-regulating nucleolar protein                     | Q9NX58 | LYAR    | 44  | 3  | 11.00% | 0.00108 |
| RNA-binding protein PNO1                                     | Q9NRX1 | PNO1    | 28  | 2  | 10.00% | 0.00108 |
| 14-3-3 protein epsilon                                       | P62258 | YWHAE   | 29  | 2  | 9.00%  | 0.00107 |
| Histidine--tRNA ligase, cytoplasmic                          | P12081 | HARS1   | 57  | 4  | 8.80%  | 0.00107 |
| 60S ribosomal protein L8                                     | P62917 | RPL8    | 28  | 2  | 11.00% | 0.00106 |
| H/ACA ribonucleoprotein complex subunit DKC1                 | O60832 | DKC1    | 58  | 4  | 11.00% | 0.00106 |
| Muscleblind-like protein 1                                   | Q9NR56 | MBNL1   | 42  | 3  | 15.00% | 0.00106 |
| Endoplasmic reticulum chaperone BiP                          | P11021 | HSPA5   | 72  | 4  | 12.00% | 0.00104 |
| 60S ribosomal protein L7a                                    | P62424 | RPL7A   | 30  | 2  | 11.00% | 0.00103 |
| Pyruvate kinase PKM                                          | P14618 | PKM     | 58  | 4  | 11.00% | 0.00103 |
| Zinc finger CCCH-type with G patch domain-containing protein | Q8N5A5 | ZGPAT   | 57  | 4  | 13.00% | 0.00103 |
| 60S ribosomal protein L3                                     | P39023 | RPL3    | 46  | 2  | 5.00%  | 0.00102 |

|                                                                               |        |         |     |    |        |          |
|-------------------------------------------------------------------------------|--------|---------|-----|----|--------|----------|
| DAZ-associated protein 1                                                      | Q96EP5 | DAZAP1  | 43  | 3  | 11.00% | 0.00101  |
| Eukaryotic initiation factor 4A-I                                             | P60842 | EIF4A1  | 46  | 3  | 9.10%  | 0.00101  |
| Heterogeneous nuclear ribonucleoprotein L-like                                | Q8WVV9 | HNRNPLL | 60  | 3  | 9.80%  | 0.00101  |
| Serine/arginine-rich splicing factor 5                                        | Q13243 | SRSF5   | 31  | 2  | 8.80%  | 0.001    |
| 7SK snRNA methylphosphate capping enzyme                                      | Q7L2J0 | MEPCE   | 74  | 4  | 8.60%  | 0.000991 |
| NF-kappa-B-activating protein                                                 | Q8N5F7 | NKAP    | 47  | 2  | 6.30%  | 0.000987 |
| SPATS2-like protein                                                           | Q9NUQ6 | SPATS2L | 62  | 3  | 8.10%  | 0.000979 |
| ADP-ribosylation factor-like protein 6-interacting protein 4                  | Q66PJ3 | ARL6IP4 | 45  | 3  | 12.00% | 0.000973 |
| Probable 18S rRNA (guanine-N(7))-methyltransferase                            | O43709 | BUD23   | 32  | 2  | 14.00% | 0.000972 |
| GRB10-interacting GYF protein 2                                               | Q6Y7W6 | GIGYF2  | 150 | 8  | 9.10%  | 0.000946 |
| Guanine nucleotide-binding protein-like 3-like protein                        | Q9NVN8 | GNL3L   | 66  | 4  | 9.10%  | 0.000939 |
| Elongation factor 1-gamma                                                     | P26641 | EEF1G   | 50  | 3  | 8.50%  | 0.000938 |
| MKI67 FHA domain-interacting nucleolar phosphoprotein                         | Q9BYG3 | NIFK    | 34  | 2  | 9.20%  | 0.000932 |
| KH domain-containing, RNA-binding, signal transduction-associated protein 1   | Q07666 | KHDRBS1 | 48  | 3  | 7.20%  | 0.000925 |
| Cyclin-dependent kinase 1                                                     | P06493 | CDK1    | 34  | 2  | 8.10%  | 0.00092  |
| Protein PRRC2B                                                                | Q5JSZ5 | PRRC2B  | 243 | 11 | 9.80%  | 0.000919 |
| Myelin expression factor 2                                                    | Q9P2K5 | MYEF2   | 64  | 4  | 15.00% | 0.00091  |
| GTP-binding protein 2                                                         | Q9BX10 | GTPBP2  | 66  | 4  | 7.30%  | 0.000907 |
| Eukaryotic translation initiation factor 4 gamma 2                            | P78344 | EIF4G2  | 102 | 6  | 10.00% | 0.000903 |
| Heterogeneous nuclear ribonucleoproteins C1/C2                                | P07910 | HNRNPC  | 34  | 2  | 7.50%  | 0.000893 |
| Polyadenylate-binding protein 2                                               | Q86U42 | PABPN1  | 33  | 2  | 20.00% | 0.000893 |
| Melanoma-associated antigen D1                                                | Q9Y5V3 | MAGED1  | 86  | 5  | 14.00% | 0.000878 |
| Interferon-inducible double-stranded RNA-dependent protein kinase activator A | O75569 | PRKRA   | 34  | 2  | 8.00%  | 0.000873 |
| Cleavage and polyadenylation specificity factor subunit 7                     | Q8N684 | CPSF7   | 52  | 3  | 9.30%  | 0.00087  |
| Insulin receptor substrate 4                                                  | O14654 | IRS4    | 134 | 7  | 9.20%  | 0.000869 |
| Eukaryotic translation initiation factor 2 subunit 3                          | P41091 | EIF2S3  | 51  | 3  | 13.00% | 0.000868 |
| 60S acidic ribosomal protein P0                                               | P05388 | RPLP0   | 34  | 2  | 13.00% | 0.000862 |
| U4/U6.U5 tri-snRNP-associated protein 1                                       | O43290 | SART1   | 90  | 5  | 10.00% | 0.000854 |
| Transcription intermediary factor 1-beta                                      | Q13263 | TRIM28  | 89  | 3  | 5.90%  | 0.000818 |
| Spermatid perinuclear RNA-binding protein                                     | Q96SI9 | STRBP   | 74  | 4  | 13.00% | 0.000813 |
| DDB1- and CUL4-associated factor 7                                            | P61962 | DCAF7   | 39  | 2  | 8.20%  | 0.000799 |
| RNA cytidine acetyltransferase                                                | Q9H0A0 | NAT10   | 116 | 5  | 5.70%  | 0.000799 |



|                                                              |        |         |     |    |        |          |
|--------------------------------------------------------------|--------|---------|-----|----|--------|----------|
| Heterogeneous nuclear ribonucleoprotein H3                   | P31942 | HNRNPH3 | 37  | 2  | 7.50%  | 0.000789 |
| Serine-threonine kinase receptor-associated protein          | Q9Y3F4 | STRAP   | 38  | 2  | 10.00% | 0.00078  |
| Replication factor C subunit 2                               | P35250 | RFC2    | 39  | 2  | 7.30%  | 0.000772 |
| T-complex protein 1 subunit zeta                             | P40227 | CCT6A   | 58  | 3  | 6.60%  | 0.000772 |
| Replication factor C subunit 3                               | P40938 | RFC3    | 41  | 2  | 7.90%  | 0.000767 |
| Alpha-taxilin                                                | P40222 | TXLNA   | 62  | 2  | 10.00% | 0.00075  |
| T-complex protein 1 subunit theta                            | P50990 | CCT8    | 60  | 3  | 6.80%  | 0.000748 |
| Protein ECT2                                                 | Q9H8V3 | ECT2    | 104 | 3  | 4.50%  | 0.000747 |
| Cleavage and polyadenylation specificity factor subunit 6    | Q16630 | CPSF6   | 59  | 2  | 5.10%  | 0.000744 |
| mRNA export factor                                           | P78406 | RAE1    | 41  | 2  | 9.00%  | 0.000742 |
| T-complex protein 1 subunit alpha                            | P17987 | TCP1    | 60  | 3  | 8.60%  | 0.000737 |
| Actin, cytoplasmic 2                                         | P63261 | ACTG1   | 42  | 2  | 9.10%  | 0.000728 |
| U4/U6.U5 tri-snRNP-associated protein 2                      | Q53GS9 | USP39   | 65  | 3  | 8.00%  | 0.000725 |
| YTH domain-containing family protein 2                       | Q9Y5A9 | YTHDF2  | 62  | 3  | 7.30%  | 0.000708 |
| Malonyl-CoA-acyl carrier protein transacylase, mitochondrial | Q8IVS2 | MCAT    | 43  | 2  | 7.70%  | 0.0007   |
| RNA binding protein fox-1 homolog 2                          | O43251 | RBFOX2  | 41  | 2  | 11.00% | 0.0007   |
| YTH domain-containing family protein 3                       | Q7Z739 | YTHDF3  | 64  | 3  | 8.00%  | 0.0007   |
| Serine/threonine-protein kinase VRK1                         | Q99986 | VRK1    | 45  | 2  | 11.00% | 0.00069  |
| S1 RNA-binding domain-containing protein 1                   | Q8N5C6 | SRBD1   | 112 | 5  | 5.90%  | 0.000686 |
| Pre-rRNA-processing protein TSR1 homolog                     | Q2NL82 | TSR1    | 92  | 3  | 4.70%  | 0.000679 |
| Cytoskeleton-associated protein 5                            | Q14008 | CKAP5   | 226 | 10 | 6.10%  | 0.000672 |
| Trinucleotide repeat-containing gene 6B protein              | Q9UPQ9 | TNRC6B  | 194 | 8  | 7.50%  | 0.000671 |
| CREB-regulated transcription coactivator 3                   | Q6UUU7 | CRTC3   | 67  | 3  | 8.70%  | 0.000662 |
| TAR DNA-binding protein 43                                   | Q13148 | TARDBP  | 45  | 2  | 7.20%  | 0.00066  |
| ATP-binding cassette sub-family F member 2                   | Q9UG63 | ABCF2   | 71  | 2  | 5.10%  | 0.000658 |
| Treacle protein                                              | Q13428 | TCOF1   | 152 | 7  | 7.40%  | 0.000642 |
| Protein FAM98B                                               | Q52LJ0 | FAM98B  | 46  | 2  | 5.50%  | 0.000631 |
| N-acylneuraminate cytidyltransferase                         | Q8NFW8 | CMAS    | 48  | 2  | 8.50%  | 0.000629 |
| SRSF protein kinase 1                                        | Q96SB4 | SRPK1   | 74  | 3  | 6.70%  | 0.000626 |
| Tubulin beta-2A chain                                        | Q13885 | TUBB2A  | 50  | 2  | 35.00% | 0.000614 |
| Zinc finger protein 281                                      | Q9Y2X9 | ZNF281  | 97  | 4  | 9.80%  | 0.00061  |
| Probable ATP-dependent RNA helicase DDX47                    | Q9H0S4 | DDX47   | 51  | 2  | 9.20%  | 0.0006   |
| Lysine-rich nucleolar protein 1                              | Q1ED39 | KNOP1   | 52  | 2  | 5.50%  | 0.000596 |
| Ribonuclease inhibitor                                       | P13489 | RNH1    | 50  | 2  | 5.60%  | 0.000593 |

|                                                         |        |           |     |   |       |          |
|---------------------------------------------------------|--------|-----------|-----|---|-------|----------|
| Protein LSM14 homolog A                                 | Q8ND56 | LSM14A    | 51  | 2 | 9.10% | 0.00059  |
| Vimentin                                                | P08670 | VIM       | 54  | 2 | 7.10% | 0.000586 |
| Histone deacetylase 1                                   | Q13547 | HDAC1     | 55  | 2 | 6.40% | 0.000567 |
| Squamous cell carcinoma antigen recognized by T-cells 3 | Q15020 | SART3     | 110 | 3 | 6.30% | 0.000567 |
| Heat shock protein HSP 90-beta                          | P08238 | HSP90AB1  | 83  | 3 | 6.40% | 0.000566 |
| Hyaluronan mediated motility receptor                   | O75330 | HMMR      | 84  | 3 | 6.80% | 0.000566 |
| Poly(A) RNA polymerase GLD2                             | Q6PIY7 | TENT2     | 56  | 2 | 4.80% | 0.000564 |
| Eukaryotic translation initiation factor 4E transporter | Q9NRA8 | EIF4ENIF1 | 108 | 4 | 8.10% | 0.000555 |
| U4/U6 small nuclear ribonucleoprotein Prp31             | Q8WWY3 | PRPF31    | 55  | 2 | 5.60% | 0.000547 |
| Pre-mRNA-processing factor 19                           | Q9UMS4 | PRPF19    | 55  | 2 | 4.20% | 0.000542 |
| Serine--tRNA ligase, cytoplasmic                        | P49591 | SARS1     | 59  | 2 | 6.00% | 0.000531 |
| Ankyrin repeat domain-containing protein 17             | O75179 | ANKRD17   | 274 | 8 | 9.60% | 0.000525 |
| Apoptosis inhibitor 5                                   | Q9BZZ5 | API5      | 59  | 2 | 3.20% | 0.000521 |
| Importin subunit alpha-1                                | P52292 | KPNA2     | 58  | 2 | 5.30% | 0.000516 |
| Cell division cycle 5-like protein                      | Q99459 | CDC5L     | 92  | 3 | 5.10% | 0.000511 |
| T-complex protein 1 subunit beta                        | P78371 | CCT2      | 57  | 2 | 6.50% | 0.000511 |
| DNA (cytosine-5)-methyltransferase 1                    | P26358 | DNMT1     | 183 | 6 | 4.70% | 0.000507 |
| Lariat debranching enzyme                               | Q9UK59 | DBR1      | 62  | 2 | 3.70% | 0.000502 |
| Spermatogenesis-associated serine-rich protein 2        | Q86XZ4 | SPATS2    | 60  | 2 | 7.30% | 0.000501 |
| Asparagine--tRNA ligase, cytoplasmic                    | O43776 | NARS1     | 63  | 2 | 4.90% | 0.000498 |
| ATP-citrate synthase                                    | P53396 | ACLY      | 121 | 4 | 4.60% | 0.000496 |
| YTH domain-containing family protein 1                  | Q9BYJ9 | YTHDF1    | 61  | 2 | 9.10% | 0.000489 |
| RNA N6-adenosine-methyltransferase METTL16              | Q86W50 | METTL16   | 64  | 2 | 4.30% | 0.000486 |
| E3 ubiquitin-protein ligase ZFP91                       | Q96JP5 | ZFP91     | 63  | 2 | 8.40% | 0.000479 |
| Elongation factor 2                                     | P13639 | EEF2      | 95  | 2 | 3.50% | 0.000478 |
| Leucine-rich repeat-containing protein 47               | Q8N1G4 | LRRC47    | 63  | 2 | 4.60% | 0.000469 |
| MAP7 domain-containing protein 3                        | Q8IWC1 | MAP7D3    | 98  | 3 | 4.50% | 0.000468 |
| ATP-dependent RNA helicase DDX54                        | Q8TDD1 | DDX54     | 99  | 2 | 3.50% | 0.000465 |
| Pescadillo homolog                                      | O00541 | PES1      | 68  | 2 | 6.60% | 0.000465 |
| Serine/threonine-protein kinase PLK1                    | P53350 | PLK1      | 68  | 2 | 5.60% | 0.000453 |
| Protein regulator of cytokinesis 1                      | O43663 | PRC1      | 72  | 2 | 4.20% | 0.000441 |
| E3 ubiquitin/ISG15 ligase TRIM25                        | Q14258 | TRIM25    | 71  | 2 | 3.50% | 0.000434 |
| Ribosome biogenesis protein BMS1 homolog                | Q14692 | BMS1      | 146 | 4 | 4.70% | 0.000426 |
| ATP-dependent DNA helicase Q1                           | P46063 | RECQL     | 73  | 2 | 3.90% | 0.000421 |

|                                                       |        |          |     |   |       |          |
|-------------------------------------------------------|--------|----------|-----|---|-------|----------|
| Tudor domain-containing protein 3                     | Q9H7E2 | TDRD3    | 73  | 2 | 3.80% | 0.00042  |
| RNA-binding protein 26                                | Q5T8P6 | RBM26    | 114 | 3 | 5.40% | 0.000407 |
| Helicase-like transcription factor                    | Q14527 | HLTF     | 114 | 3 | 4.10% | 0.000406 |
| HBS1-like protein                                     | Q9Y450 | HBS1L    | 75  | 2 | 5.30% | 0.000399 |
| Lamina-associated polypeptide 2, isoform alpha        | P42166 | TMPO     | 75  | 2 | 3.50% | 0.000394 |
| Mitotic deacetylase-associated SANT domain protein    | Q6PJG2 | MIDEAS   | 115 | 3 | 3.40% | 0.000392 |
| BCL-6 corepressor                                     | Q6W2J9 | BCOR     | 192 | 4 | 4.00% | 0.000389 |
| RNA-binding protein 27                                | Q9P2N5 | RBM27    | 119 | 3 | 3.40% | 0.000387 |
| Cleavage stimulation factor subunit 3                 | Q12996 | CSTF3    | 83  | 2 | 4.20% | 0.000381 |
| La-related protein 4                                  | Q71RC2 | LARP4    | 81  | 2 | 4.40% | 0.000377 |
| Heat shock protein HSP 90-alpha                       | P07900 | HSP90AA1 | 85  | 2 | 5.20% | 0.000373 |
| Double-stranded RNA-specific editase 1                | P78563 | ADARB1   | 81  | 2 | 1.80% | 0.000369 |
| Ribosomal RNA processing protein 1 homolog B          | Q14684 | RRP1B    | 84  | 2 | 4.50% | 0.00036  |
| Probable ATP-dependent RNA helicase DHX37             | Q8IY37 | DHX37    | 130 | 3 | 3.30% | 0.000354 |
| Transcription factor Sp1                              | P08047 | SP1      | 81  | 2 | 5.60% | 0.000348 |
| Splicing factor 3A subunit 1                          | Q15459 | SF3A1    | 89  | 2 | 3.70% | 0.000344 |
| ATP-dependent RNA helicase DHX30                      | Q7L2E3 | DHX30    | 134 | 3 | 4.10% | 0.000343 |
| Ubiquitin carboxyl-terminal hydrolase 10              | Q14694 | USP10    | 87  | 2 | 3.30% | 0.000342 |
| Protein argonaute-1                                   | Q9UL18 | AGO1     | 97  | 2 | 4.10% | 0.000319 |
| Putative PIP5K1A and PSMD4-like protein               | A2A3N6 | PIPSL    | 95  | 2 | 2.90% | 0.000317 |
| Ataxin-2                                              | Q99700 | ATXN2    | 140 | 3 | 3.70% | 0.000312 |
| Sister chromatid cohesion protein PDS5 homolog A      | Q29RF7 | PDS5A    | 151 | 3 | 4.10% | 0.000306 |
| Pre-mRNA-processing factor 6                          | O94906 | PRPF6    | 107 | 2 | 2.90% | 0.00029  |
| WD repeat-containing protein 36                       | Q8NI36 | WDR36    | 105 | 2 | 2.30% | 0.000287 |
| Pre-mRNA-processing factor 40 homolog A               | O75400 | PRPF40A  | 109 | 2 | 3.10% | 0.000285 |
| Catenin delta-1                                       | O60716 | CTNND1   | 108 | 2 | 4.10% | 0.000282 |
| 116 kDa U5 small nuclear ribonucleoprotein component  | Q15029 | EFTUD2   | 109 | 2 | 2.30% | 0.000281 |
| DNA ligase 3                                          | P49916 | LIG3     | 113 | 2 | 2.20% | 0.000271 |
| Proline-rich protein 12                               | Q9ULL5 | PRR12    | 211 | 4 | 4.10% | 0.000268 |
| Exosome RNA helicase MTR4                             | P42285 | MTREX    | 118 | 2 | 2.30% | 0.000262 |
| SURP and G-patch domain-containing protein 2          | Q8IX01 | SUGP2    | 120 | 2 | 3.50% | 0.000252 |
| Constitutive coactivator of PPAR-gamma-like protein 1 | Q9NZB2 | FAM120A  | 122 | 2 | 2.80% | 0.000244 |
| Ubiquitin-associated protein 2                        | Q5T6F2 | UBAP2    | 117 | 2 | 2.80% | 0.000244 |
| 5'-3' exoribonuclease 1                               | Q8IZH2 | XRN1     | 194 | 2 | 2.10% | 0.00024  |

|           |                                                              |        |           |     |    |        |          |
|-----------|--------------------------------------------------------------|--------|-----------|-----|----|--------|----------|
|           | Microtubule-associated protein 4                             | P27816 | MAP4      | 121 | 2  | 2.80%  | 0.000237 |
|           | Pyruvate carboxylase, mitochondrial                          | P11498 | PC        | 130 | 2  | 3.10%  | 0.000232 |
|           | Pumilio homolog 1                                            | Q14671 | PUM1      | 126 | 2  | 2.50%  | 0.00023  |
|           | Transcription initiation factor TFIIID subunit 2             | Q6P1X5 | TAF2      | 137 | 2  | 1.70%  | 0.000228 |
|           | ATP-dependent DNA helicase Q4                                | O94761 | RECQL4    | 133 | 2  | 3.40%  | 0.000226 |
|           | Structural maintenance of chromosomes protein 3              | Q9UQE7 | SMC3      | 142 | 2  | 2.20%  | 0.000224 |
|           | Probable helicase with zinc finger domain                    | P42694 | HELZ      | 219 | 3  | 2.50%  | 0.000211 |
|           | Trinucleotide repeat-containing gene 6A protein              | Q8NDV7 | TNRC6A    | 210 | 3  | 2.80%  | 0.000209 |
|           | Ribonuclease 3                                               | Q9NRR4 | DROSHA    | 159 | 2  | 2.50%  | 0.000199 |
|           | U5 small nuclear ribonucleoprotein 200 kDa helicase          | O75643 | SNRNP200  | 245 | 3  | 1.50%  | 0.000192 |
|           | Eukaryotic translation initiation factor 4 gamma 1           | Q04637 | EIF4G1    | 175 | 2  | 1.60%  | 0.000171 |
|           | Protein RRP5 homolog                                         | Q14690 | PDCD11    | 209 | 2  | 1.30%  | 0.000146 |
|           | Pre-mRNA-processing-splicing factor 8                        | Q6P2Q9 | PRPF8     | 274 | 2  | 0.99%  | 0.000117 |
|           | Acetyl-CoA carboxylase 2                                     | O00763 | ACACB     | 277 | 2  | 6.30%  | 0.000111 |
| RNA5SP268 | Zinc finger CCCH-type with G patch domain-containing protein | Q8N5A5 | ZGPAT     | 57  | 40 | 75.00% | 0.0473   |
|           | 60S ribosomal protein L38                                    | P63173 | RPL38     | 8   | 6  | 57.00% | 0.0207   |
|           | Heterogeneous nuclear ribonucleoprotein M                    | P52272 | HNRNPM    | 78  | 35 | 61.00% | 0.0127   |
|           | Heterogeneous nuclear ribonucleoprotein A1                   | P09651 | HNRNPA1   | 39  | 19 | 42.00% | 0.0121   |
|           | Heterogeneous nuclear ribonucleoproteins A2/B1               | P22626 | HNRNPA2B1 | 37  | 19 | 61.00% | 0.0116   |
|           | Translation machinery-associated protein 7                   | Q9Y2S6 | TMA7      | 7   | 5  | 41.00% | 0.0113   |
|           | Thiosulfate sulfurtransferase                                | Q16762 | TST       | 33  | 14 | 65.00% | 0.00922  |
|           | Epithelial splicing regulatory protein 2                     | Q9H6T0 | ESRP2     | 78  | 25 | 46.00% | 0.00742  |
|           | 40S ribosomal protein S19                                    | P39019 | RPS19     | 16  | 9  | 45.00% | 0.00722  |
|           | Pre-mRNA-splicing factor ATP-dependent RNA helicase DHX15    | O43143 | DHX15     | 91  | 35 | 42.00% | 0.00719  |
|           | 40S ribosomal protein S25                                    | P62851 | RPS25     | 14  | 5  | 29.00% | 0.00709  |
|           | Interleukin enhancer-binding factor 2                        | Q12905 | ILF2      | 43  | 18 | 59.00% | 0.00702  |
|           | 40S ribosomal protein S17                                    | P08708 | RPS17     | 16  | 5  | 44.00% | 0.00656  |
|           | 40S ribosomal protein S18                                    | P62269 | RPS18     | 18  | 10 | 48.00% | 0.00636  |
|           | Non-POU domain-containing octamer-binding protein            | Q15233 | NONO      | 54  | 15 | 45.00% | 0.00616  |
|           | Heterogeneous nuclear ribonucleoprotein H                    | P31943 | HNRNPH1   | 49  | 13 | 41.00% | 0.0061   |
|           | Tubulin beta chain                                           | P07437 | TUBB      | 50  | 16 | 45.00% | 0.00599  |
|           | 40S ribosomal protein S14                                    | P62263 | RPS14     | 16  | 8  | 42.00% | 0.00587  |
|           | 40S ribosomal protein S10                                    | P46783 | RPS10     | 19  | 6  | 46.00% | 0.00586  |
|           | Interleukin enhancer-binding factor 3                        | Q12906 | ILF3      | 95  | 40 | 60.00% | 0.00586  |

|                                                            |        |         |     |    |        |         |
|------------------------------------------------------------|--------|---------|-----|----|--------|---------|
| 40S ribosomal protein S29                                  | P62273 | RPS29   | 7   | 2  | 36.00% | 0.00575 |
| 40S ribosomal protein S3                                   | P23396 | RPS3    | 27  | 12 | 49.00% | 0.00563 |
| Eukaryotic translation initiation factor 1A, Y-chromosomal | O14602 | EIF1AY  | 16  | 5  | 59.00% | 0.00559 |
| Peptidyl-prolyl cis-trans isomerase H                      | O43447 | PPIH    | 19  | 7  | 54.00% | 0.00546 |
| Eukaryotic translation initiation factor 4B                | P23588 | EIF4B   | 69  | 21 | 38.00% | 0.00527 |
| Elongation factor 1-alpha 1                                | P68104 | EEF1A1  | 50  | 13 | 48.00% | 0.00523 |
| 60S ribosomal protein L23                                  | P62829 | RPL23   | 15  | 5  | 21.00% | 0.00518 |
| Tubulin alpha-1B chain                                     | P68363 | TUBA1B  | 50  | 15 | 48.00% | 0.005   |
| 40S ribosomal protein S16                                  | P62249 | RPS16   | 16  | 7  | 41.00% | 0.00496 |
| Heterogeneous nuclear ribonucleoprotein A3                 | P51991 | HNRNPA3 | 40  | 13 | 35.00% | 0.0049  |
| Protein phosphatase 1B                                     | O75688 | PPM1B   | 53  | 17 | 42.00% | 0.00488 |
| Peroxiredoxin-1                                            | Q06830 | PRDX1   | 22  | 10 | 40.00% | 0.00486 |
| Cold-inducible RNA-binding protein                         | Q14011 | CIRBP   | 19  | 6  | 34.00% | 0.00468 |
| Splicing factor, proline- and glutamine-rich               | P23246 | SFPQ    | 76  | 26 | 43.00% | 0.00467 |
| 40S ribosomal protein S7                                   | P62081 | RPS7    | 22  | 10 | 52.00% | 0.00457 |
| Actin, cytoplasmic 2                                       | P63261 | ACTG1   | 42  | 12 | 44.00% | 0.00451 |
| ATP-dependent RNA helicase A                               | Q08211 | DHX9    | 141 | 41 | 39.00% | 0.0045  |
| Heterogeneous nuclear ribonucleoprotein A0                 | Q13151 | HNRNPA0 | 31  | 12 | 31.00% | 0.00449 |
| Protein arginine N-methyltransferase 5                     | O14744 | PRMT5   | 73  | 23 | 46.00% | 0.00443 |
| 40S ribosomal protein S24                                  | P62847 | RPS24   | 15  | 6  | 39.00% | 0.00424 |
| U4/U6 small nuclear ribonucleoprotein Prp31                | Q8WWY3 | PRPF31  | 55  | 17 | 41.00% | 0.0042  |
| 60S ribosomal protein L9                                   | P32969 | RPL9    | 22  | 8  | 42.00% | 0.00419 |
| Plasminogen activator inhibitor 1 RNA-binding protein      | Q8NC51 | SERBP1  | 45  | 12 | 37.00% | 0.00415 |
| 40S ribosomal protein S30                                  | P62861 | FAU     | 7   | 2  | 19.00% | 0.0041  |
| Small EDRK-rich factor 2                                   | P84101 | SERF2   | 7   | 3  | 31.00% | 0.0041  |
| Heat shock cognate 71 kDa protein                          | P11142 | HSPA8   | 71  | 24 | 48.00% | 0.00399 |
| Multiple myeloma tumor-associated protein 2                | Q9BU76 | MMTAG2  | 29  | 10 | 32.00% | 0.00398 |
| 60S ribosomal protein L22-like 1                           | Q6P5R6 | RPL22L1 | 15  | 4  | 49.00% | 0.00396 |
| Serine/threonine-protein kinase 38                         | Q15208 | STK38   | 54  | 13 | 41.00% | 0.00381 |
| 60S ribosomal protein L22                                  | P35268 | RPL22   | 15  | 5  | 41.00% | 0.00378 |
| Histone H1.2                                               | P16403 | H1-2    | 21  | 9  | 28.00% | 0.00378 |
| Heat shock 70 kDa protein 1B                               | P0DMV9 | HSPA1B  | 70  | 22 | 45.00% | 0.00377 |
| BOLA-like protein 2                                        | Q9H3K6 | BOLA2   | 10  | 2  | 29.00% | 0.00375 |
| Tubulin-specific chaperone A                               | O75347 | TBCA    | 13  | 3  | 35.00% | 0.00373 |

|                                                        |             |          |     |    |        |         |
|--------------------------------------------------------|-------------|----------|-----|----|--------|---------|
| 40S ribosomal protein S4, X isoform                    | P62701      | RPS4X    | 30  | 12 | 38.00% | 0.00367 |
| Thymosin beta-10                                       | P63313      | TMSB10   | 5   | 2  | 39.00% | 0.00366 |
| Creatine kinase B-type                                 | P12277      | CKB      | 43  | 11 | 46.00% | 0.00359 |
| 28 kDa heat- and acid-stable phosphoprotein            | Q13442      | PDAP1    | 21  | 4  | 23.00% | 0.00356 |
| RNA-binding protein Musashi homolog 1                  | O43347      | MSI1     | 39  | 10 | 43.00% | 0.00356 |
| Alpha-enolase                                          | P06733      | ENO1     | 47  | 14 | 39.00% | 0.00353 |
| Y-box-binding protein 1                                | P67809      | YBX1     | 36  | 10 | 64.00% | 0.00348 |
| T-complex protein 1 subunit epsilon                    | P48643      | CCT5     | 60  | 15 | 41.00% | 0.00342 |
| 40S ribosomal protein S20                              | P60866      | RPS20    | 13  | 4  | 26.00% | 0.00338 |
| Small nuclear ribonucleoprotein Sm D1                  | P62314      | SNRPD1   | 13  | 3  | 37.00% | 0.00338 |
| Acetyl-CoA carboxylase 1                               | Q13085      | ACACA    | 266 | 72 | 40.00% | 0.00336 |
| 40S ribosomal protein S15                              | P62841      | RPS15    | 17  | 4  | 56.00% | 0.00333 |
| Far upstream element-binding protein 2                 | Q92945      | KHSRP    | 73  | 24 | 46.00% | 0.00328 |
| Retinitis pigmentosa 9 protein                         | Q8TA86      | RP9      | 26  | 4  | 21.00% | 0.00328 |
| Heterogeneous nuclear ribonucleoprotein H3             | P31942      | HNRNPH3  | 37  | 10 | 58.00% | 0.00326 |
| THO complex subunit 4                                  | Q86V81      | ALYREF   | 27  | 8  | 48.00% | 0.00313 |
| Histone H2A type 2-C                                   | Q16777 (+1) | H2AC20   | 14  | 3  | 30.00% | 0.00312 |
| Enhancer of rudimentary homolog                        | P84090      | ERH      | 12  | 4  | 33.00% | 0.0031  |
| Peptidyl-prolyl cis-trans isomerase NIMA-interacting 4 | Q9Y237      | PIN4     | 14  | 4  | 42.00% | 0.00307 |
| Methylosome protein 50                                 | Q9BQA1      | WDR77    | 37  | 6  | 27.00% | 0.00306 |
| Heat shock protein HSP 90-beta                         | P08238      | HSP90AB1 | 83  | 20 | 33.00% | 0.003   |
| High mobility group protein B1                         | P09429      | HMGB1    | 25  | 7  | 27.00% | 0.003   |
| Eukaryotic initiation factor 4A-I                      | P60842      | EIF4A1   | 46  | 13 | 43.00% | 0.00298 |
| Peptidyl-prolyl cis-trans isomerase A                  | P62937      | PPIA     | 18  | 4  | 36.00% | 0.00293 |
| Prothymosin alpha                                      | P06454      | PTMA     | 12  | 3  | 34.00% | 0.0029  |
| Glyceraldehyde-3-phosphate dehydrogenase               | P04406      | GAPDH    | 36  | 9  | 48.00% | 0.00288 |
| Heterogeneous nuclear ribonucleoprotein Q              | O60506      | SYNCRIP  | 70  | 17 | 42.00% | 0.00284 |
| U4/U6 small nuclear ribonucleoprotein Prp3             | O43395      | PRPF3    | 78  | 17 | 30.00% | 0.00283 |
| 60S acidic ribosomal protein P2                        | P05387      | RPLP2    | 12  | 3  | 59.00% | 0.0028  |
| RNA-binding protein FUS                                | P35637      | FUS      | 53  | 9  | 20.00% | 0.00276 |
| 40S ribosomal protein S3a                              | P61247      | RPS3A    | 30  | 8  | 34.00% | 0.00275 |
| Endothelial differentiation-related factor 1           | O60869      | EDF1     | 16  | 4  | 32.00% | 0.00272 |
| Methylosome subunit pICln                              | P54105      | CLNS1A   | 26  | 4  | 38.00% | 0.00272 |
| Non-histone chromosomal protein HMG-17                 | P05204      | HMGN2    | 9   | 2  | 46.00% | 0.00268 |

|                                                       |        |         |     |    |        |         |
|-------------------------------------------------------|--------|---------|-----|----|--------|---------|
| Double-stranded RNA-binding protein Staufen homolog 1 | O95793 | STAU1   | 63  | 19 | 40.00% | 0.00265 |
| Mth938 domain-containing protein                      | Q9H7C9 | AAMDC   | 13  | 3  | 27.00% | 0.00264 |
| Eukaryotic translation initiation factor 5A-1         | P63241 | EIF5A   | 17  | 3  | 34.00% | 0.00261 |
| GTP-binding nuclear protein Ran                       | P62826 | RAN     | 24  | 6  | 19.00% | 0.00261 |
| 60S ribosomal protein L23a                            | P62750 | RPL23A  | 18  | 4  | 31.00% | 0.00258 |
| RNA-binding protein 3                                 | P98179 | RBM3    | 17  | 4  | 49.00% | 0.00256 |
| 40S ribosomal protein S11                             | P62280 | RPS11   | 18  | 3  | 15.00% | 0.00255 |
| 40S ribosomal protein S9                              | P46781 | RPS9    | 23  | 5  | 28.00% | 0.00249 |
| 40S ribosomal protein S15a                            | P62244 | RPS15A  | 15  | 4  | 41.00% | 0.00248 |
| 60S ribosomal protein L19                             | P84098 | RPL19   | 23  | 4  | 14.00% | 0.00247 |
| Nucleophosmin                                         | P06748 | NPM1    | 33  | 6  | 42.00% | 0.00247 |
| U4/U6 small nuclear ribonucleoprotein Prp4            | O43172 | PRPF4   | 58  | 14 | 33.00% | 0.00247 |
| 40S ribosomal protein S12                             | P25398 | RPS12   | 15  | 2  | 27.00% | 0.00244 |
| 60S ribosomal protein L12                             | P30050 | RPL12   | 18  | 4  | 45.00% | 0.00244 |
| Cofilin-1                                             | P23528 | CFL1    | 19  | 5  | 50.00% | 0.00243 |
| Polypyrimidine tract-binding protein 1                | P26599 | PTBP1   | 57  | 12 | 40.00% | 0.00243 |
| RNA-binding protein 10                                | P98175 | RBM10   | 104 | 23 | 33.00% | 0.00242 |
| Far upstream element-binding protein 3                | Q96I24 | FUBP3   | 62  | 12 | 39.00% | 0.00239 |
| Nucleolin                                             | P19338 | NCL     | 77  | 17 | 26.00% | 0.00238 |
| 40S ribosomal protein S5                              | P46782 | RPS5    | 23  | 3  | 23.00% | 0.00237 |
| Endoplasmic reticulum chaperone BiP                   | P11021 | HSPA5   | 72  | 15 | 30.00% | 0.00234 |
| 40S ribosomal protein S28                             | P62857 | RPS28   | 8   | 2  | 23.00% | 0.00233 |
| 40S ribosomal protein S8                              | P62241 | RPS8    | 24  | 4  | 21.00% | 0.00232 |
| High mobility group protein B2                        | P26583 | HMGB2   | 24  | 5  | 17.00% | 0.00231 |
| Receptor of activated protein C kinase 1              | P63244 | RACK1   | 35  | 6  | 20.00% | 0.00229 |
| ATP synthase subunit beta, mitochondrial              | P06576 | ATP5F1B | 57  | 10 | 31.00% | 0.00228 |
| Heterogeneous nuclear ribonucleoprotein D0            | Q14103 | HNRNPD  | 38  | 8  | 26.00% | 0.00227 |
| 40S ribosomal protein S6                              | P62753 | RPS6    | 29  | 4  | 20.00% | 0.00226 |
| T-complex protein 1 subunit beta                      | P78371 | CCT2    | 57  | 12 | 34.00% | 0.00226 |
| E3 ubiquitin-protein ligase RBX1                      | P62877 | RBX1    | 12  | 2  | 19.00% | 0.00224 |
| T-complex protein 1 subunit delta                     | P50991 | CCT4    | 58  | 12 | 35.00% | 0.00224 |
| ELAV-like protein 1                                   | Q15717 | ELAVL1  | 36  | 7  | 29.00% | 0.00222 |
| 14-3-3 protein epsilon                                | P62258 | YWHAE   | 29  | 6  | 37.00% | 0.00221 |
| Fructose-bisphosphate aldolase A                      | P04075 | ALDOA   | 39  | 8  | 30.00% | 0.00221 |

|                                                                  |           |           |     |    |        |         |
|------------------------------------------------------------------|-----------|-----------|-----|----|--------|---------|
| Transitional endoplasmic reticulum ATPase                        | P55072    | VCP       | 89  | 16 | 29.00% | 0.0022  |
| Interferon-induced, double-stranded RNA-activated protein kinase | P19525    | EIF2AK2   | 62  | 14 | 34.00% | 0.00219 |
| 40S ribosomal protein SA                                         | P08865    | RPSA      | 33  | 7  | 36.00% | 0.00218 |
| T-complex protein 1 subunit alpha                                | P17987    | TCP1      | 60  | 11 | 34.00% | 0.00217 |
| Protein FAM32A                                                   | Q9Y421    | FAM32A    | 13  | 3  | 28.00% | 0.00216 |
| Spindlin-1                                                       | Q9Y657    | SPIN1     | 30  | 5  | 28.00% | 0.00215 |
| Spindlin interactor and repressor of chromatin-binding protein   | Q9BUA3    | SPINDOC   | 41  | 8  | 37.00% | 0.00211 |
| Heterogeneous nuclear ribonucleoprotein K                        | P61978    | HNRNPK    | 51  | 10 | 28.00% | 0.00209 |
| T-complex protein 1 subunit eta                                  | Q99832    | CCT7      | 59  | 11 | 30.00% | 0.00208 |
| Ras GTPase-activating protein-binding protein 1                  | Q13283    | G3BP1     | 52  | 11 | 38.00% | 0.00207 |
| T-complex protein 1 subunit theta                                | P50990    | CCT8      | 60  | 12 | 25.00% | 0.00206 |
| Myotrophin                                                       | P58546    | MTPN      | 13  | 2  | 31.00% | 0.00205 |
| Immunoglobulin kappa variable 2D-29                              | A0A075B6S | IGKV2D-29 | 13  | 2  | 17.00% | 0.00201 |
| Nucleolar protein of 40 kDa                                      | Q9NP64    | ZCCHC17   | 28  | 5  | 23.00% | 0.00201 |
| U6 snRNA-associated Sm-like protein LSM6                         | P62312    | LSM6      | 9   | 2  | 24.00% | 0.00201 |
| Translation machinery-associated protein 16                      | Q96EY4    | TMA16     | 24  | 5  | 29.00% | 0.00198 |
| Elongation factor 2                                              | P13639    | EEF2      | 95  | 16 | 23.00% | 0.00197 |
| T-complex protein 1 subunit zeta                                 | P40227    | CCT6A     | 58  | 10 | 34.00% | 0.00197 |
| TAR DNA-binding protein 43                                       | Q13148    | TARDBP    | 45  | 8  | 26.00% | 0.00195 |
| Thyroid hormone receptor-associated protein 3                    | Q9Y2W1    | THRAP3    | 109 | 17 | 23.00% | 0.00194 |
| 60S ribosomal protein L31                                        | P62899    | RPL31     | 14  | 3  | 26.00% | 0.00193 |
| Phosphoglycerate kinase 1                                        | P00558    | PGK1      | 45  | 7  | 31.00% | 0.00193 |
| TGF-beta-activated kinase 1 and MAP3K7-binding protein 1         | Q15750    | TAB1      | 55  | 10 | 35.00% | 0.00192 |
| 60S ribosomal protein L13                                        | P26373    | RPL13     | 24  | 5  | 22.00% | 0.00191 |
| Activated RNA polymerase II transcriptional coactivator p15      | P53999    | SUB1      | 14  | 3  | 31.00% | 0.0019  |
| Cyclin-dependent kinase 1                                        | P06493    | CDK1      | 34  | 6  | 30.00% | 0.0019  |
| Signal recognition particle 9 kDa protein                        | P49458    | SRP9      | 10  | 2  | 23.00% | 0.00187 |
| X-ray repair cross-complementing protein 6                       | P12956    | XRCC6     | 70  | 13 | 28.00% | 0.00185 |
| Probable ATP-dependent RNA helicase DDX5                         | P17844    | DDX5      | 69  | 13 | 28.00% | 0.00184 |
| Poly [ADP-ribose] polymerase 1                                   | P09874    | PARP1     | 113 | 16 | 26.00% | 0.00183 |
| RNA-binding protein 39                                           | Q14498    | RBM39     | 59  | 11 | 22.00% | 0.00182 |
| Reticulocalbin-2                                                 | Q14257    | RCN2      | 37  | 6  | 33.00% | 0.00178 |
| Signal recognition particle 14 kDa protein                       | P37108    | SRP14     | 15  | 3  | 31.00% | 0.00178 |
| T-complex protein 1 subunit gamma                                | P49368    | CCT3      | 61  | 10 | 28.00% | 0.00177 |



|                                                                         |        |          |     |    |        |         |
|-------------------------------------------------------------------------|--------|----------|-----|----|--------|---------|
| 60S ribosomal protein L28                                               | P46779 | RPL28    | 16  | 3  | 18.00% | 0.00176 |
| Heterogeneous nuclear ribonucleoprotein U                               | Q00839 | HNRNPU   | 91  | 16 | 23.00% | 0.00176 |
| 60S ribosomal protein L17                                               | P18621 | RPL17    | 21  | 4  | 29.00% | 0.00175 |
| Protein arginine N-methyltransferase 1                                  | Q99873 | PRMT1    | 42  | 6  | 23.00% | 0.00174 |
| 26S proteasome regulatory subunit 6B                                    | P43686 | PSMC4    | 47  | 7  | 31.00% | 0.00173 |
| Y-box-binding protein 3                                                 | P16989 | YBX3     | 40  | 7  | 58.00% | 0.00173 |
| 6-phosphofructo-2-kinase/fructose-2,6-bisphosphatase 3                  | Q16875 | PFKFB3   | 60  | 10 | 22.00% | 0.0017  |
| 40S ribosomal protein S23                                               | P62266 | RPS23    | 16  | 3  | 16.00% | 0.00169 |
| Pyruvate kinase PKM                                                     | P14618 | PKM      | 58  | 10 | 27.00% | 0.00167 |
| Heat shock protein HSP 90-alpha                                         | P07900 | HSP90AA1 | 85  | 11 | 31.00% | 0.00165 |
| 60S ribosomal protein L27a                                              | P46776 | RPL27A   | 17  | 3  | 16.00% | 0.00163 |
| Protein dpy-30 homolog                                                  | Q9C005 | DPY30    | 11  | 2  | 36.00% | 0.00163 |
| Ubiquitin-associated protein 2-like                                     | Q14157 | UBAP2L   | 115 | 17 | 30.00% | 0.00163 |
| ADP/ATP translocase 2                                                   | P05141 | SLC25A5  | 33  | 5  | 18.00% | 0.00162 |
| DNA-directed RNA polymerases I, II, and III subunit RPABC3              | P52434 | POLR2H   | 17  | 3  | 22.00% | 0.00161 |
| High mobility group protein B3                                          | O15347 | HMGB3    | 23  | 4  | 23.00% | 0.00161 |
| Ribosomal biogenesis factor                                             | Q8N0T1 | RBIS     | 11  | 2  | 22.00% | 0.00161 |
| 40S ribosomal protein S13                                               | P62277 | RPS13    | 17  | 3  | 17.00% | 0.0016  |
| Myosin light polypeptide 6                                              | P60660 | MYL6     | 17  | 2  | 19.00% | 0.0016  |
| Squamous cell carcinoma antigen recognized by T-cells 3                 | Q15020 | SART3    | 110 | 17 | 24.00% | 0.00159 |
| DAZ-associated protein 1                                                | Q96EP5 | DAZAP1   | 43  | 5  | 14.00% | 0.00158 |
| U6 snRNA-associated Sm-like protein LSM3                                | P62310 | LSM3     | 12  | 2  | 33.00% | 0.00158 |
| Prefoldin subunit 2                                                     | Q9UHV9 | PFDN2    | 17  | 3  | 30.00% | 0.00157 |
| Protein LSM14 homolog A                                                 | Q8ND56 | LSM14A   | 51  | 6  | 23.00% | 0.00157 |
| Replication protein A 70 kDa DNA-binding subunit                        | P27694 | RPA1     | 68  | 9  | 24.00% | 0.00157 |
| c-Myc-binding protein                                                   | Q99417 | MYCBP    | 12  | 2  | 25.00% | 0.00156 |
| Serine/threonine-protein kinase 38-like                                 | Q9Y2H1 | STK38L   | 54  | 6  | 20.00% | 0.00156 |
| Serine/threonine-protein kinase RIO1                                    | Q9BRS2 | RIOK1    | 66  | 7  | 17.00% | 0.00156 |
| Arf-GAP with coiled-coil, ANK repeat and PH domain-containing protein 2 | Q15057 | ACAP2    | 88  | 14 | 27.00% | 0.00155 |
| Heterogeneous nuclear ribonucleoprotein F                               | P52597 | HNRNPF   | 46  | 6  | 33.00% | 0.00155 |
| Probable ATP-dependent RNA helicase DDX17                               | Q92841 | DDX17    | 80  | 13 | 21.00% | 0.00155 |
| X-ray repair cross-complementing protein 5                              | P13010 | XRCC5    | 83  | 10 | 21.00% | 0.00154 |
| 26S proteasome non-ATPase regulatory subunit 11                         | O00231 | PSMD11   | 47  | 7  | 22.00% | 0.00153 |

|                                                             |        |         |     |    |        |         |
|-------------------------------------------------------------|--------|---------|-----|----|--------|---------|
| Low molecular weight phosphotyrosine protein phosphatase    | P24666 | ACP1    | 18  | 3  | 25.00% | 0.00153 |
| 26S proteasome non-ATPase regulatory subunit 3              | O43242 | PSMD3   | 61  | 10 | 28.00% | 0.00151 |
| Eukaryotic translation initiation factor 3 subunit G        | O75821 | EIF3G   | 36  | 6  | 18.00% | 0.00151 |
| Histone H1.10                                               | Q92522 | H1-10   | 22  | 3  | 22.00% | 0.00151 |
| U4/U6.U5 tri-snRNP-associated protein 1                     | O43290 | SART1   | 90  | 13 | 26.00% | 0.00151 |
| 26S proteasome regulatory subunit 7                         | P35998 | PSMC2   | 49  | 7  | 30.00% | 0.00149 |
| 60S ribosomal protein L10a                                  | P62906 | RPL10A  | 25  | 2  | 14.00% | 0.00148 |
| 26S proteasome regulatory subunit 6A                        | P17980 | PSMC3   | 49  | 7  | 26.00% | 0.00147 |
| Peptidyl-prolyl cis-trans isomerase-like 4                  | Q8WUA2 | PPIL4   | 57  | 6  | 18.00% | 0.00147 |
| RNA-binding protein Musashi homolog 2                       | Q96DH6 | MSI2    | 35  | 6  | 26.00% | 0.00147 |
| Heterogeneous nuclear ribonucleoprotein A/B                 | Q99729 | HNRNPAB | 36  | 4  | 14.00% | 0.00146 |
| Serine/arginine-rich splicing factor 2                      | Q01130 | SRSF2   | 25  | 3  | 19.00% | 0.00146 |
| Transcription intermediary factor 1-beta                    | Q13263 | TRIM28  | 89  | 12 | 22.00% | 0.00145 |
| Tubulin beta-4B chain                                       | P68371 | TUBB4B  | 50  | 3  | 41.00% | 0.00145 |
| Elongation factor 1-delta                                   | P29692 | EEF1D   | 31  | 4  | 17.00% | 0.00143 |
| Heterogeneous nuclear ribonucleoprotein H2                  | P55795 | HNRNPH2 | 49  | 5  | 27.00% | 0.00143 |
| Cleavage and polyadenylation specificity factor subunit 5   | O43809 | NUDT21  | 26  | 3  | 24.00% | 0.00142 |
| Myosin regulatory light chain 12A                           | P19105 | MYL12A  | 20  | 3  | 18.00% | 0.00141 |
| 60S ribosomal protein L30                                   | P62888 | RPL30   | 13  | 2  | 10.00% | 0.0014  |
| 26S proteasome regulatory subunit 8                         | P62195 | PSMC5   | 46  | 6  | 22.00% | 0.00139 |
| Nuclear fragile X mental retardation-interacting protein 2  | Q7Z417 | NUFIP2  | 76  | 10 | 21.00% | 0.00139 |
| Far upstream element-binding protein 1                      | Q96AE4 | FUBP1   | 68  | 10 | 28.00% | 0.00138 |
| Small nuclear ribonucleoprotein Sm D2                       | P62316 | SNRPD2  | 14  | 2  | 25.00% | 0.00137 |
| Ubiquitin-like modifier-activating enzyme 1                 | P22314 | UBA1    | 118 | 14 | 23.00% | 0.00137 |
| Zinc finger protein 346                                     | Q9UL40 | ZNF346  | 33  | 4  | 18.00% | 0.00137 |
| 60S ribosomal protein L11                                   | P62913 | RPL11   | 20  | 3  | 20.00% | 0.00136 |
| Caprin-1                                                    | Q14444 | CAPRIN1 | 78  | 8  | 22.00% | 0.00136 |
| Heat shock 70 kDa protein 4                                 | P34932 | HSPA4   | 94  | 11 | 16.00% | 0.00134 |
| CUGBP Elav-like family member 1                             | Q92879 | CELF1   | 52  | 6  | 12.00% | 0.00133 |
| Multifunctional protein ADE2                                | P22234 | PAICS   | 47  | 6  | 18.00% | 0.00133 |
| 60S ribosomal protein L4                                    | P36578 | RPL4    | 48  | 4  | 9.10%  | 0.00132 |
| RNA transcription, translation and transport factor protein | Q9Y224 | RTRAF   | 28  | 3  | 25.00% | 0.00132 |
| 14-3-3 protein theta                                        | P27348 | YWHAQ   | 28  | 4  | 14.00% | 0.00131 |
| 60S ribosomal protein L35                                   | P42766 | RPL35   | 15  | 2  | 22.00% | 0.00131 |

|                                                               |        |          |     |    |        |         |
|---------------------------------------------------------------|--------|----------|-----|----|--------|---------|
| Uncharacterized protein C11orf98                              | E9PRG8 | C11orf98 | 14  | 2  | 22.00% | 0.00131 |
| 26S proteasome non-ATPase regulatory subunit 14               | O00487 | PSMD14   | 35  | 4  | 31.00% | 0.0013  |
| Multifunctional methyltransferase subunit TRM112-like protein | Q9UI30 | TRMT112  | 14  | 2  | 22.00% | 0.00129 |
| Splicing factor 3B subunit 6                                  | Q9Y3B4 | SF3B6    | 15  | 2  | 21.00% | 0.00129 |
| 26S proteasome regulatory subunit 4                           | P62191 | PSMC1    | 49  | 5  | 19.00% | 0.00128 |
| Protein disulfide-isomerase A3                                | P30101 | PDIA3    | 57  | 6  | 15.00% | 0.00128 |
| 60S acidic ribosomal protein P0                               | P05388 | RPLP0    | 34  | 5  | 23.00% | 0.00127 |
| DnaJ homolog subfamily C member 8                             | O75937 | DNAJC8   | 30  | 4  | 30.00% | 0.00127 |
| Eukaryotic translation initiation factor 3 subunit E          | P60228 | EIF3E    | 52  | 5  | 18.00% | 0.00127 |
| NHP2-like protein 1                                           | P55769 | SNU13    | 14  | 2  | 16.00% | 0.00126 |
| Cysteine and glycine-rich protein 2                           | Q16527 | CSRP2    | 21  | 3  | 21.00% | 0.00125 |
| Elongation factor Tu, mitochondrial                           | P49411 | TUFM     | 50  | 6  | 15.00% | 0.00125 |
| Influenza virus NS1A-binding protein                          | Q9Y6Y0 | IVNS1ABP | 72  | 5  | 14.00% | 0.00125 |
| 26S proteasome regulatory subunit 10B                         | P62333 | PSMC6    | 44  | 6  | 23.00% | 0.00124 |
| Eukaryotic translation initiation factor 3 subunit I          | Q13347 | EIF3I    | 37  | 5  | 24.00% | 0.00124 |
| RNA-binding motif protein, X chromosome                       | P38159 | RBMX     | 42  | 6  | 19.00% | 0.00124 |
| RuvB-like 1                                                   | Q9Y265 | RUVBL1   | 50  | 4  | 12.00% | 0.00124 |
| Mitotic checkpoint protein BUB3                               | O43684 | BUB3     | 37  | 5  | 23.00% | 0.00123 |
| Proteasome subunit alpha type-4                               | P25789 | PSMA4    | 29  | 3  | 12.00% | 0.00123 |
| ATP-dependent RNA helicase DDX3X                              | O00571 | DDX3X    | 73  | 8  | 19.00% | 0.00122 |
| Peroxiredoxin-2                                               | P32119 | PRDX2    | 22  | 3  | 21.00% | 0.00122 |
| 60S ribosomal protein L7a                                     | P62424 | RPL7A    | 30  | 3  | 15.00% | 0.00121 |
| D-3-phosphoglycerate dehydrogenase                            | O43175 | PHGDH    | 57  | 8  | 19.00% | 0.00121 |
| L-lactate dehydrogenase A chain                               | P00338 | LDHA     | 37  | 5  | 17.00% | 0.00121 |
| Transgelin-2                                                  | P37802 | TAGLN2   | 22  | 3  | 18.00% | 0.00121 |
| CD2 antigen cytoplasmic tail-binding protein 2                | O95400 | CD2BP2   | 38  | 5  | 19.00% | 0.00118 |
| Prohibitin                                                    | P35232 | PHB      | 30  | 3  | 16.00% | 0.00118 |
| Importin-8                                                    | O15397 | IPO8     | 120 | 13 | 17.00% | 0.00116 |
| Glutathione S-transferase P                                   | P09211 | GSTP1    | 23  | 3  | 34.00% | 0.00115 |
| Heterogeneous nuclear ribonucleoprotein R                     | O43390 | HNRNPR   | 71  | 7  | 23.00% | 0.00115 |
| Polymerase delta-interacting protein 3                        | Q9BY77 | POLDIP3  | 46  | 6  | 22.00% | 0.00115 |
| Profilin-1                                                    | P07737 | PFN1     | 15  | 2  | 21.00% | 0.00115 |
| Eukaryotic translation initiation factor 3 subunit H          | O15372 | EIF3H    | 40  | 4  | 20.00% | 0.00114 |
| Matrin-3                                                      | P43243 | MATR3    | 95  | 9  | 20.00% | 0.00114 |

|                                                           |        |         |     |    |        |          |
|-----------------------------------------------------------|--------|---------|-----|----|--------|----------|
| 60S ribosomal protein L10                                 | P27635 | RPL10   | 25  | 2  | 6.50%  | 0.00113  |
| Eukaryotic translation initiation factor 3 subunit F      | O00303 | EIF3F   | 38  | 4  | 17.00% | 0.00113  |
| Insulin-like growth factor 2 mRNA-binding protein 1       | Q9NZI8 | IGF2BP1 | 63  | 6  | 15.00% | 0.00112  |
| 60S ribosomal protein L26                                 | P61254 | RPL26   | 17  | 2  | 13.00% | 0.00111  |
| Phenylalanine--tRNA ligase alpha subunit                  | Q9Y285 | FARSA   | 58  | 6  | 21.00% | 0.00111  |
| Developmentally-regulated GTP-binding protein 1           | Q9Y295 | DRG1    | 41  | 5  | 19.00% | 0.0011   |
| Poly(rC)-binding protein 2                                | Q15366 | PCBP2   | 39  | 3  | 18.00% | 0.0011   |
| Uncharacterized protein NKAPD1                            | Q6ZUT1 | NKAPD1  | 34  | 4  | 16.00% | 0.0011   |
| Calmodulin-3                                              | P0DP25 | CALM3   | 17  | 2  | 21.00% | 0.00108  |
| Coiled-coil domain-containing protein 124                 | Q96CT7 | CCDC124 | 26  | 3  | 15.00% | 0.00108  |
| Peroxiredoxin-6                                           | P30041 | PRDX6   | 25  | 2  | 15.00% | 0.00108  |
| Prohibitin-2                                              | Q99623 | PHB2    | 33  | 4  | 16.00% | 0.00108  |
| Stathmin                                                  | P16949 | STMN1   | 17  | 2  | 18.00% | 0.00108  |
| 26S proteasome non-ATPase regulatory subunit 4            | P55036 | PSMD4   | 41  | 4  | 15.00% | 0.00107  |
| Calcyclin-binding protein                                 | Q9HB71 | CACYBP  | 26  | 3  | 19.00% | 0.00106  |
| Staphylococcal nuclease domain-containing protein 1       | Q7KZF4 | SND1    | 102 | 11 | 19.00% | 0.00106  |
| Translin                                                  | Q15631 | TSN     | 26  | 2  | 9.60%  | 0.00106  |
| Bcl-2-associated transcription factor 1                   | Q9NYF8 | BCLAF1  | 106 | 10 | 14.00% | 0.00105  |
| Eukaryotic translation initiation factor 3 subunit A      | Q14152 | EIF3A   | 167 | 15 | 15.00% | 0.00105  |
| U4/U6.U5 small nuclear ribonucleoprotein 27 kDa protein   | Q8WVK2 | SNRNP27 | 19  | 2  | 22.00% | 0.00104  |
| Cleavage and polyadenylation specificity factor subunit 7 | Q8N684 | CPSF7   | 52  | 5  | 15.00% | 0.00103  |
| ATP synthase subunit alpha, mitochondrial                 | P25705 | ATP5F1A | 60  | 7  | 18.00% | 0.00102  |
| Eukaryotic translation initiation factor 2 subunit 1      | P05198 | EIF2S1  | 36  | 4  | 19.00% | 0.00102  |
| Proliferation-associated protein 2G4                      | Q9UQ80 | PA2G4   | 44  | 5  | 23.00% | 0.00102  |
| Adenylate kinase 2, mitochondrial                         | P54819 | AK2     | 26  | 3  | 22.00% | 0.00101  |
| DNA-(apurinic or apyrimidinic site) endonuclease          | P27695 | APEX1   | 36  | 4  | 18.00% | 0.00101  |
| Chloride intracellular channel protein 1                  | O00299 | CLIC1   | 27  | 3  | 17.00% | 0.001    |
| Ras GTPase-activating protein-binding protein 2           | Q9UN86 | G3BP2   | 54  | 5  | 19.00% | 0.001    |
| 60S ribosomal protein L3                                  | P39023 | RPL3    | 46  | 4  | 14.00% | 0.000999 |
| Ribosomal RNA small subunit methyltransferase NEP1        | Q92979 | EMG1    | 27  | 3  | 15.00% | 0.00099  |
| Lupus La protein                                          | P05455 | SSB     | 47  | 5  | 18.00% | 0.000987 |
| 14-3-3 protein zeta/delta                                 | P63104 | YWHAZ   | 28  | 2  | 13.00% | 0.000986 |
| Protein FAM133B                                           | Q5BKY9 | FAM133B | 28  | 2  | 17.00% | 0.000978 |
| NF-kappa-B-activating protein                             | Q8N5F7 | NKAP    | 47  | 4  | 13.00% | 0.00097  |

|                                                           |        |         |     |    |        |          |
|-----------------------------------------------------------|--------|---------|-----|----|--------|----------|
| Triosephosphate isomerase                                 | P60174 | TPI1    | 27  | 2  | 11.00% | 0.00097  |
| Calmodulin-regulated spectrin-associated protein 3        | Q9P1Y5 | CAMSAP3 | 135 | 13 | 22.00% | 0.000967 |
| L-lactate dehydrogenase B chain                           | P07195 | LDHB    | 37  | 4  | 15.00% | 0.000965 |
| ATP-dependent DNA/RNA helicase DHX36                      | Q9H2U1 | DHX36   | 115 | 11 | 17.00% | 0.000959 |
| Heterogeneous nuclear ribonucleoprotein D-like            | O14979 | HNRNPDL | 46  | 4  | 19.00% | 0.000959 |
| Pre-mRNA-splicing factor CWC25 homolog                    | Q9NXE8 | CWC25   | 50  | 5  | 9.90%  | 0.000948 |
| 60S ribosomal protein L8                                  | P62917 | RPL8    | 28  | 3  | 22.00% | 0.00094  |
| Inosine-5'-monophosphate dehydrogenase 2                  | P12268 | IMPDH2  | 56  | 6  | 18.00% | 0.00094  |
| Translationally-controlled tumor protein                  | P13693 | TPT1    | 20  | 2  | 16.00% | 0.000936 |
| RNA-binding protein MEX3A                                 | A1L020 | MEX3A   | 54  | 6  | 19.00% | 0.000929 |
| RNA-binding protein 8A                                    | Q9Y5S9 | RBM8A   | 20  | 2  | 26.00% | 0.000926 |
| 116 kDa U5 small nuclear ribonucleoprotein component      | Q15029 | EFTUD2  | 109 | 9  | 13.00% | 0.000911 |
| Nucleolar protein 16                                      | Q9Y3C1 | NOP16   | 21  | 2  | 18.00% | 0.000905 |
| Myosin-9                                                  | P35579 | MYH9    | 227 | 20 | 18.00% | 0.000904 |
| U5 small nuclear ribonucleoprotein 40 kDa protein         | Q96DI7 | SNRNP40 | 39  | 3  | 24.00% | 0.000902 |
| ADP-ribosylation factor 1                                 | P84077 | ARF1    | 21  | 2  | 18.00% | 0.00089  |
| Vigilin                                                   | Q00341 | HDLBP   | 141 | 14 | 17.00% | 0.000889 |
| 26S proteasome non-ATPase regulatory subunit 12           | O00232 | PSMD12  | 53  | 5  | 15.00% | 0.000883 |
| Eukaryotic translation initiation factor 3 subunit D      | O15371 | EIF3D   | 64  | 6  | 20.00% | 0.000882 |
| Splicing factor 1                                         | Q15637 | SF1     | 68  | 6  | 15.00% | 0.000882 |
| Cleavage and polyadenylation specificity factor subunit 6 | Q16630 | CPSF6   | 59  | 4  | 11.00% | 0.000877 |
| RuvB-like 2                                               | Q9Y230 | RUVBL2  | 51  | 5  | 14.00% | 0.00087  |
| Poly(U)-binding-splicing factor PUF60                     | Q9UHX1 | PUF60   | 60  | 5  | 19.00% | 0.000864 |
| Vimentin                                                  | P08670 | VIM     | 54  | 5  | 13.00% | 0.000864 |
| RNA-binding protein EWS                                   | Q01844 | EWSR1   | 68  | 3  | 11.00% | 0.000859 |
| 60S ribosomal protein L18                                 | Q07020 | RPL18   | 22  | 2  | 14.00% | 0.000857 |
| Eukaryotic translation initiation factor 3 subunit L      | Q9Y262 | EIF3L   | 67  | 5  | 15.00% | 0.000857 |
| Tryptophan--tRNA ligase, cytoplasmic                      | P23381 | WARS1   | 53  | 4  | 15.00% | 0.000855 |
| Eukaryotic translation initiation factor 2 subunit 3      | P41091 | EIF2S3  | 51  | 4  | 16.00% | 0.000853 |
| Hsp90 co-chaperone Cdc37                                  | Q16543 | CDC37   | 44  | 4  | 17.00% | 0.000852 |
| Parkinson disease protein 7                               | Q99497 | PARK7   | 20  | 2  | 13.00% | 0.000852 |
| Cancer-related nucleoside-triphosphatase                  | Q9BSD7 | NTPCR   | 21  | 2  | 16.00% | 0.000848 |
| Flap endonuclease 1                                       | P39748 | FEN1    | 43  | 4  | 18.00% | 0.000848 |
| Jupiter microtubule associated homolog 2                  | Q9H910 | JPT2    | 20  | 2  | 16.00% | 0.000848 |

|                                                                                   |        |          |     |    |        |          |
|-----------------------------------------------------------------------------------|--------|----------|-----|----|--------|----------|
| Tropomyosin alpha-3 chain                                                         | P06753 | TPM3     | 33  | 3  | 13.00% | 0.000848 |
| F-actin-capping protein subunit alpha-1                                           | P52907 | CAPZA1   | 33  | 3  | 17.00% | 0.000845 |
| RNA-binding protein 14                                                            | Q96PK6 | RBM14    | 69  | 7  | 18.00% | 0.000843 |
| Rho-associated protein kinase 1                                                   | Q13464 | ROCK1    | 158 | 14 | 12.00% | 0.000833 |
| Guanine nucleotide-binding protein-like 3-like protein                            | Q9NVN8 | GNL3L    | 66  | 5  | 14.00% | 0.00083  |
| MARCKS-related protein                                                            | P49006 | MARCKSL1 | 20  | 2  | 14.00% | 0.000826 |
| Protein LSM12 homolog                                                             | Q3MHD2 | LSM12    | 22  | 2  | 14.00% | 0.000826 |
| 40S ribosomal protein S2                                                          | P15880 | RPS2     | 31  | 3  | 12.00% | 0.000825 |
| Zinc finger RNA-binding protein                                                   | Q96KR1 | ZFR      | 117 | 9  | 15.00% | 0.000825 |
| Casein kinase II subunit alpha                                                    | P68400 | CSNK2A1  | 45  | 4  | 18.00% | 0.000824 |
| Serine/threonine-protein phosphatase 2A 65 kDa regulatory subunit A alpha isoform | P30153 | PPP2R1A  | 65  | 5  | 12.00% | 0.00082  |
| tRNA (adenine(58)-N(1))-methyltransferase non-catalytic subunit TRM6              | Q9UJA5 | TRMT6    | 56  | 5  | 16.00% | 0.00081  |
| Myelin expression factor 2                                                        | Q9P2K5 | MYEF2    | 64  | 5  | 16.00% | 0.000805 |
| Dynactin subunit 2                                                                | Q13561 | DCTN2    | 44  | 4  | 16.00% | 0.000803 |
| DNA replication licensing factor MCM3                                             | P25205 | MCM3     | 91  | 7  | 15.00% | 0.000797 |
| RNA-splicing ligase RtcB homolog                                                  | Q9Y3I0 | RTCB     | 55  | 4  | 14.00% | 0.000797 |
| Filamin-A                                                                         | P21333 | FLNA     | 281 | 21 | 14.00% | 0.000791 |
| 60S ribosomal protein L15                                                         | P61313 | RPL15    | 24  | 2  | 14.00% | 0.00079  |
| Rho GDP-dissociation inhibitor 1                                                  | P52565 | ARHGDI1  | 23  | 2  | 16.00% | 0.00079  |
| Double-stranded RNA-specific adenosine deaminase                                  | P55265 | ADAR     | 136 | 12 | 14.00% | 0.000788 |
| Probable dimethyladenosine transferase                                            | Q9UNQ2 | DIMT1    | 35  | 3  | 11.00% | 0.000772 |
| Fatty acid synthase                                                               | P49327 | FASN     | 273 | 21 | 15.00% | 0.00077  |
| Pre-mRNA-processing factor 6                                                      | O94906 | PRPF6    | 107 | 8  | 10.00% | 0.00077  |
| SAP domain-containing ribonucleoprotein                                           | P82979 | SARNP    | 24  | 2  | 14.00% | 0.000767 |
| ADP-ribosylation factor-like protein 6-interacting protein 4                      | Q66PJ3 | ARL6IP4  | 45  | 4  | 12.00% | 0.000765 |
| 39S ribosomal protein L48, mitochondrial                                          | Q96GC5 | MRPL48   | 24  | 2  | 11.00% | 0.00076  |
| Ribose-phosphate pyrophosphokinase 1                                              | P60891 | PRPS1    | 35  | 2  | 9.40%  | 0.00076  |
| Histone-binding protein RBBP4                                                     | Q09028 | RBBP4    | 48  | 2  | 12.00% | 0.000758 |
| ATP synthase subunit O, mitochondrial                                             | P48047 | ATP5PO   | 23  | 2  | 12.00% | 0.000756 |
| rRNA 2'-O-methyltransferase fibrillarin                                           | P22087 | FBL      | 34  | 3  | 14.00% | 0.000753 |
| Heat shock protein 105 kDa                                                        | Q92598 | HSPH1    | 97  | 8  | 14.00% | 0.000751 |
| Adenosylhomocysteinase                                                            | P23526 | AHCY     | 48  | 4  | 12.00% | 0.000746 |
| Peptidyl-prolyl cis-trans isomerase B                                             | P23284 | PPIB     | 24  | 2  | 10.00% | 0.000746 |

|                                                                                   |        |         |     |   |        |          |
|-----------------------------------------------------------------------------------|--------|---------|-----|---|--------|----------|
| Myotubularin-related protein 14                                                   | Q8NCE2 | MTMR14  | 72  | 5 | 14.00% | 0.000743 |
| Hypoxanthine-guanine phosphoribosyltransferase                                    | P00492 | HPRT1   | 25  | 2 | 12.00% | 0.000739 |
| Serine/threonine-protein phosphatase PP1-beta catalytic subunit                   | P62140 | PPP1CB  | 37  | 3 | 14.00% | 0.000739 |
| Elongation factor 1-gamma                                                         | P26641 | EEF1G   | 50  | 4 | 11.00% | 0.000737 |
| U1 small nuclear ribonucleoprotein 70 kDa                                         | P08621 | SNRNP70 | 52  | 4 | 17.00% | 0.000737 |
| Importin-5                                                                        | O00410 | IPO5    | 124 | 9 | 12.00% | 0.000734 |
| Tubulin beta-2A chain                                                             | Q13885 | TUBB2A  | 50  | 3 | 39.00% | 0.000724 |
| G patch domain-containing protein 4                                               | Q5T3I0 | GPATCH4 | 50  | 3 | 12.00% | 0.000722 |
| Serine/threonine-protein phosphatase 2A 55 kDa regulatory subunit B alpha isoform | P63151 | PPP2R2A | 52  | 3 | 9.40%  | 0.000721 |
| Peptidyl-prolyl cis-trans isomerase FKBP3                                         | Q00688 | FKBP3   | 25  | 2 | 12.00% | 0.000719 |
| Elongation factor 1-beta                                                          | P24534 | EEF1B2  | 25  | 2 | 9.80%  | 0.000716 |
| Annexin A2                                                                        | P07355 | ANXA2   | 39  | 3 | 13.00% | 0.000713 |
| Protein FAM76B                                                                    | Q5HYJ3 | FAM76B  | 39  | 2 | 6.50%  | 0.000713 |
| 26S proteasome non-ATPase regulatory subunit 2                                    | Q13200 | PSMD2   | 100 | 6 | 9.40%  | 0.00071  |
| Eukaryotic translation initiation factor 3 subunit C                              | Q99613 | EIF3C   | 105 | 6 | 8.80%  | 0.000706 |
| 60 kDa heat shock protein, mitochondrial                                          | P10809 | HSPD1   | 61  | 4 | 12.00% | 0.000703 |
| Tyrosine-protein kinase JAK1                                                      | P23458 | JAK1    | 133 | 8 | 11.00% | 0.000698 |
| Eukaryotic translation initiation factor 3 subunit B                              | P55884 | EIF3B   | 92  | 6 | 8.70%  | 0.000693 |
| Pre-mRNA 3'-end-processing factor FIP1                                            | Q6UN15 | FIP1L1  | 67  | 4 | 10.00% | 0.000678 |
| Protein LTV1 homolog                                                              | Q96GA3 | LTV1    | 55  | 3 | 7.80%  | 0.000678 |
| DNA replication licensing factor MCM7                                             | P33993 | MCM7    | 81  | 6 | 12.00% | 0.000672 |
| Hepatoma-derived growth factor                                                    | P51858 | HDGF    | 27  | 2 | 20.00% | 0.000671 |
| Splicing factor U2AF 35 kDa subunit                                               | Q01081 | U2AF1   | 28  | 2 | 11.00% | 0.000671 |
| Septin-2                                                                          | Q15019 | SEPTIN2 | 41  | 3 | 16.00% | 0.000669 |
| Histone deacetylase 1                                                             | Q13547 | HDAC1   | 55  | 4 | 15.00% | 0.000668 |
| Probable ATP-dependent RNA helicase DDX6                                          | P26196 | DDX6    | 54  | 4 | 16.00% | 0.000667 |
| Fructose-bisphosphate aldolase C                                                  | P09972 | ALDOC   | 39  | 2 | 7.10%  | 0.000664 |
| ATP-citrate synthase                                                              | P53396 | ACLY    | 121 | 9 | 13.00% | 0.000658 |
| DNA replication licensing factor MCM5                                             | P33992 | MCM5    | 82  | 6 | 13.00% | 0.000658 |
| 14-3-3 protein beta/alpha                                                         | P31946 | YWHAH   | 28  | 2 | 12.00% | 0.000655 |
| 14-3-3 protein eta                                                                | Q04917 | YWHAH   | 28  | 2 | 9.80%  | 0.000655 |
| 60S ribosomal protein L7                                                          | P18124 | RPL7    | 29  | 2 | 10.00% | 0.00065  |
| Chromatin target of PRMT1 protein                                                 | Q9Y3Y2 | CHTOP   | 26  | 2 | 10.00% | 0.00065  |

|                                                                 |        |         |     |    |        |          |
|-----------------------------------------------------------------|--------|---------|-----|----|--------|----------|
| Eukaryotic translation initiation factor 4H                     | Q15056 | EIF4H   | 27  | 2  | 17.00% | 0.00065  |
| General transcription factor II-I                               | P78347 | GTF2I   | 112 | 8  | 12.00% | 0.000646 |
| Protein DEK                                                     | P35659 | DEK     | 43  | 3  | 9.30%  | 0.000644 |
| Protein lin-28 homolog B                                        | Q6ZN17 | LIN28B  | 27  | 2  | 14.00% | 0.000644 |
| Deoxyuridine 5'-triphosphate nucleotidohydrolase, mitochondrial | P33316 | DUT     | 27  | 2  | 12.00% | 0.000639 |
| Proteasome activator complex subunit 3                          | P61289 | PSME3   | 30  | 2  | 11.00% | 0.000634 |
| Protein disulfide-isomerase                                     | P07237 | P4HB    | 57  | 3  | 7.50%  | 0.000634 |
| Polyadenylate-binding protein 1                                 | P11940 | PABPC1  | 71  | 5  | 10.00% | 0.000633 |
| Protein CDV3 homolog                                            | Q9UKY7 | CDV3    | 27  | 2  | 28.00% | 0.000624 |
| Protein FRG1                                                    | Q14331 | FRG1    | 29  | 2  | 11.00% | 0.000624 |
| 26S proteasome non-ATPase regulatory subunit 6                  | Q15008 | PSMD6   | 46  | 3  | 12.00% | 0.000621 |
| Pre-mRNA-processing-splicing factor 8                           | Q6P2Q9 | PRPF8   | 274 | 17 | 13.00% | 0.000621 |
| Transcription factor E2F7                                       | Q96AV8 | E2F7    | 100 | 6  | 12.00% | 0.000619 |
| Nucleosome assembly protein 1-like 1                            | P55209 | NAP1L1  | 45  | 3  | 16.00% | 0.000618 |
| Nucleolar RNA helicase 2                                        | Q9NR30 | DDX21   | 87  | 6  | 8.60%  | 0.000617 |
| Proliferating cell nuclear antigen                              | P12004 | PCNA    | 29  | 2  | 12.00% | 0.000617 |
| Paraspeckle component 1                                         | Q8WXF1 | PSPC1   | 59  | 3  | 9.60%  | 0.000616 |
| Putative RNA-binding protein Luc7-like 2                        | Q9Y383 | LUC7L2  | 47  | 3  | 8.40%  | 0.000616 |
| Apoptosis inhibitor 5                                           | Q9BZZ5 | API5    | 59  | 4  | 9.20%  | 0.000615 |
| Proteasome subunit alpha type-1                                 | P25786 | PSMA1   | 30  | 2  | 11.00% | 0.000612 |
| Pumilio homolog 1                                               | Q14671 | PUM1    | 126 | 7  | 9.70%  | 0.000611 |
| Glucosidase 2 subunit beta                                      | P14314 | PRKCSH  | 59  | 3  | 5.90%  | 0.00061  |
| Importin subunit alpha-1                                        | P52292 | KPNA2   | 58  | 4  | 13.00% | 0.000609 |
| C-1-tetrahydrofolate synthase, cytoplasmic                      | P11586 | MTHFD1  | 102 | 7  | 11.00% | 0.000603 |
| Acidic leucine-rich nuclear phosphoprotein 32 family member E   | Q9BTT0 | ANP32E  | 31  | 2  | 5.20%  | 0.000601 |
| Angiomotin                                                      | Q4VCS5 | AMOT    | 118 | 7  | 9.90%  | 0.000594 |
| Proteasomal ubiquitin receptor ADRM1                            | Q16186 | ADRM1   | 42  | 2  | 7.90%  | 0.000594 |
| Stress-70 protein, mitochondrial                                | P38646 | HSPA9   | 74  | 5  | 11.00% | 0.000593 |
| Stress-induced-phosphoprotein 1                                 | P31948 | STIP1   | 63  | 4  | 9.20%  | 0.000593 |
| Pre-mRNA-processing factor 40 homolog A                         | O75400 | PRPF40A | 109 | 7  | 11.00% | 0.000589 |
| Kinesin-1 heavy chain                                           | P33176 | KIF5B   | 110 | 7  | 11.00% | 0.000585 |
| Carbonyl reductase [NADPH] 3                                    | O75828 | CBR3    | 31  | 2  | 10.00% | 0.000582 |
| Probable 18S rRNA (guanine-N(7))-methyltransferase              | O43709 | BUD23   | 32  | 2  | 14.00% | 0.000573 |
| ATP-binding cassette sub-family F member 1                      | Q8NE71 | ABCF1   | 96  | 5  | 7.90%  | 0.000572 |



|                                                                          |        |         |     |   |        |          |
|--------------------------------------------------------------------------|--------|---------|-----|---|--------|----------|
| Complement component 1 Q subcomponent-binding protein, mitochondrial     | Q07021 | C1QBP   | 31  | 2 | 12.00% | 0.000571 |
| Histone-binding protein RBBP7                                            | Q16576 | RBBP7   | 48  | 3 | 12.00% | 0.000569 |
| Zinc finger CCCH domain-containing protein 15                            | Q8WU90 | ZC3H15  | 49  | 3 | 10.00% | 0.000567 |
| Double-stranded RNA-binding protein Staufen homolog 2                    | Q9NUL3 | STAU2   | 63  | 4 | 13.00% | 0.000565 |
| Nucleolar protein 14                                                     | P78316 | NOP14   | 98  | 5 | 7.00%  | 0.000564 |
| 60S ribosomal protein L6                                                 | Q02878 | RPL6    | 33  | 2 | 11.00% | 0.000559 |
| Cleavage stimulation factor subunit 2                                    | P33240 | CSTF2   | 61  | 3 | 11.00% | 0.000558 |
| Inorganic pyrophosphatase                                                | Q15181 | PPA1    | 33  | 2 | 11.00% | 0.000557 |
| YTH domain-containing family protein 2                                   | Q9Y5A9 | YTHDF2  | 62  | 4 | 9.30%  | 0.000556 |
| Importin subunit beta-1                                                  | Q14974 | KPNB1   | 97  | 5 | 7.60%  | 0.000552 |
| Protein disulfide-isomerase A6                                           | Q15084 | PDIA6   | 48  | 3 | 10.00% | 0.000549 |
| Survival motor neuron protein                                            | Q16637 | SMN1    | 32  | 2 | 9.50%  | 0.000548 |
| Heterogeneous nuclear ribonucleoprotein L                                | P14866 | HNRNPL  | 64  | 4 | 20.00% | 0.000547 |
| Bifunctional purine biosynthesis protein ATIC                            | P31939 | ATIC    | 65  | 4 | 11.00% | 0.000544 |
| Calnexin                                                                 | P27824 | CANX    | 68  | 4 | 11.00% | 0.000544 |
| 60S ribosomal protein L5                                                 | P46777 | RPL5    | 34  | 2 | 8.80%  | 0.000542 |
| Tubulin beta-6 chain                                                     | Q9BUF5 | TUBB6   | 50  | 3 | 26.00% | 0.000542 |
| DNA-3-methyladenine glycosylase                                          | P29372 | MPG     | 33  | 2 | 11.00% | 0.000541 |
| Zinc finger CCCH-type antiviral protein 1                                | Q7Z2W4 | ZC3HAV1 | 101 | 5 | 9.80%  | 0.000536 |
| Dolichyl-diphosphooligosaccharide--protein glycosyltransferase subunit 1 | P04843 | RPN1    | 69  | 4 | 8.20%  | 0.000531 |
| RNA-binding protein with serine-rich domain 1                            | Q15287 | RNPS1   | 34  | 2 | 10.00% | 0.000528 |
| Heterogeneous nuclear ribonucleoproteins C1/C2                           | P07910 | HNRNPC  | 34  | 2 | 8.80%  | 0.000526 |
| Ataxin-2-like protein                                                    | Q8WWM7 | ATXN2L  | 113 | 7 | 11.00% | 0.000524 |
| Probable ATP-dependent RNA helicase DDX41                                | Q9UJV9 | DDX41   | 70  | 4 | 7.60%  | 0.000518 |
| Transcriptional activator protein Pur-beta                               | Q96QR8 | PURB    | 33  | 2 | 14.00% | 0.000516 |
| Glyoxalase domain-containing protein 4                                   | Q9HC38 | GLOD4   | 35  | 2 | 7.30%  | 0.000515 |
| Insulin receptor substrate 4                                             | O14654 | IRS4    | 134 | 8 | 12.00% | 0.000513 |
| Nuclear autoantigenic sperm protein                                      | P49321 | NASP    | 85  | 4 | 13.00% | 0.000511 |
| Valine--tRNA ligase                                                      | P26640 | VAR51   | 140 | 8 | 9.70%  | 0.00051  |
| ATP-dependent RNA helicase DDX19A                                        | Q9NUU7 | DDX19A  | 54  | 3 | 9.60%  | 0.000505 |
| Methionine aminopeptidase 2                                              | P50579 | METAP2  | 53  | 2 | 10.00% | 0.000505 |
| Endoplasmin                                                              | P14625 | HSP90B1 | 92  | 5 | 10.00% | 0.000501 |

|                                                           |        |          |     |    |        |          |
|-----------------------------------------------------------|--------|----------|-----|----|--------|----------|
| RNA-binding motif protein, X-linked 2                     | Q9Y388 | RBMX2    | 37  | 2  | 7.10%  | 0.0005   |
| N-alpha-acetyltransferase 25, NatB auxiliary subunit      | Q14CX7 | NAA25    | 112 | 6  | 6.30%  | 0.000497 |
| BTB/POZ domain-containing protein KCTD12                  | Q96CX2 | KCTD12   | 36  | 2  | 7.40%  | 0.000496 |
| Calponin-3                                                | Q15417 | CNN3     | 36  | 2  | 8.20%  | 0.00049  |
| U5 small nuclear ribonucleoprotein 200 kDa helicase       | O75643 | SNRNP200 | 245 | 12 | 8.10%  | 0.00049  |
| Treacle protein                                           | Q13428 | TCOF1    | 152 | 9  | 10.00% | 0.000487 |
| Serine/threonine-protein kinase PRP4 homolog              | Q13523 | PRPF4B   | 117 | 6  | 7.70%  | 0.00048  |
| Protein quaking                                           | Q96PU8 | QKI      | 38  | 2  | 7.30%  | 0.000472 |
| CAD protein                                               | P27708 | CAD      | 243 | 12 | 9.10%  | 0.000471 |
| Probable ATP-dependent RNA helicase DDX46                 | Q7L014 | DDX46    | 117 | 6  | 7.00%  | 0.000469 |
| Nucleolar complex protein 4 homolog                       | Q9BVI4 | NOC4L    | 58  | 3  | 12.00% | 0.000468 |
| Protein FAM98A                                            | Q8NCA5 | FAM98A   | 55  | 2  | 7.10%  | 0.000466 |
| Decreased expression in renal and prostate cancer protein | P0CG12 | DERPC    | 51  | 3  | 8.80%  | 0.000461 |
| Casein kinase II subunit alpha'                           | P19784 | CSNK2A2  | 41  | 2  | 7.10%  | 0.00046  |
| Serine-threonine kinase receptor-associated protein       | Q9Y3F4 | STRAP    | 38  | 2  | 10.00% | 0.00046  |
| Homer protein homolog 1                                   | Q86YM7 | HOMER1   | 40  | 2  | 7.90%  | 0.000455 |
| Homer protein homolog 2                                   | Q9NSB8 | HOMER2   | 41  | 2  | 7.30%  | 0.000455 |
| Replication factor C subunit 2                            | P35250 | RFC2     | 39  | 2  | 7.30%  | 0.000455 |
| Exportin-1                                                | O14980 | XPO1     | 123 | 4  | 7.50%  | 0.000451 |
| Splicing factor 3B subunit 2                              | Q13435 | SF3B2    | 100 | 4  | 10.00% | 0.00045  |
| Protein phosphatase 1G                                    | O15355 | PPM1G    | 59  | 3  | 7.50%  | 0.000443 |
| RNA-binding protein 4                                     | Q9BWF3 | RBM4     | 40  | 2  | 12.00% | 0.000443 |
| RNA 3'-terminal phosphate cyclase                         | O00442 | RTCA     | 39  | 2  | 7.90%  | 0.00044  |
| Src substrate cortactin                                   | Q14247 | CTTN     | 62  | 3  | 14.00% | 0.000439 |
| Hsc70-interacting protein                                 | P50502 | ST13     | 41  | 2  | 7.30%  | 0.000437 |
| ATP-dependent RNA helicase DDX1                           | Q92499 | DDX1     | 82  | 4  | 7.80%  | 0.000435 |
| Cyclin-dependent kinase 9                                 | P50750 | CDK9     | 43  | 2  | 5.40%  | 0.000433 |
| Cytosolic purine 5'-nucleotidase                          | P49902 | NT5C2    | 65  | 3  | 11.00% | 0.000431 |
| Nucleosome assembly protein 1-like 4                      | Q99733 | NAP1L4   | 43  | 2  | 7.70%  | 0.00043  |
| U4/U6.U5 tri-snRNP-associated protein 2                   | Q53GS9 | USP39    | 65  | 2  | 5.30%  | 0.000428 |
| HIV Tat-specific factor 1                                 | O43719 | HTATSF1  | 86  | 4  | 12.00% | 0.000427 |
| Neutral alpha-glucosidase AB                              | Q14697 | GANAB    | 107 | 5  | 9.60%  | 0.000427 |
| 26S proteasome non-ATPase regulatory subunit 1            | Q99460 | PSMD1    | 106 | 5  | 7.00%  | 0.000423 |
| RNA cytosine C(5)-methyltransferase NSUN2                 | Q08J23 | NSUN2    | 86  | 4  | 9.50%  | 0.00042  |

|                                                          |        |          |     |    |        |          |
|----------------------------------------------------------|--------|----------|-----|----|--------|----------|
| Moesin                                                   | P26038 | MSN      | 68  | 3  | 6.20%  | 0.000419 |
| SLAIN motif-containing protein 2                         | Q9P270 | SLAIN2   | 63  | 3  | 8.80%  | 0.000416 |
| Melanoma-associated antigen D1                           | Q9Y5V3 | MAGED1   | 86  | 4  | 8.90%  | 0.000414 |
| RNA binding protein fox-1 homolog 2                      | O43251 | RBFOX2   | 41  | 2  | 11.00% | 0.000413 |
| Ankyrin repeat and KH domain-containing protein 1        | Q8IWZ3 | ANKHD1   | 269 | 12 | 8.10%  | 0.000412 |
| Protein enabled homolog                                  | Q8N8S7 | ENAH     | 67  | 2  | 7.30%  | 0.000409 |
| S-adenosylmethionine synthase isoform type-2             | P31153 | MAT2A    | 44  | 2  | 6.60%  | 0.000408 |
| Obg-like ATPase 1                                        | Q9NTK5 | OLA1     | 45  | 2  | 6.60%  | 0.000407 |
| DnaJ homolog subfamily A member 1                        | P31689 | DNAJA1   | 45  | 2  | 14.00% | 0.000406 |
| Splicing factor 3A subunit 1                             | Q15459 | SF3A1    | 89  | 3  | 6.60%  | 0.000406 |
| mRNA-capping enzyme                                      | O60942 | RNGTT    | 69  | 2  | 3.70%  | 0.000405 |
| Insulin-like growth factor 2 mRNA-binding protein 2      | Q9Y6M1 | IGF2BP2  | 66  | 2  | 7.20%  | 0.000403 |
| Cytoskeleton-associated protein 4                        | Q07065 | CKAP4    | 66  | 3  | 7.50%  | 0.000401 |
| RNA-binding motif, single-stranded-interacting protein 1 | P29558 | RBMS1    | 45  | 2  | 13.00% | 0.000397 |
| Splicing factor 3B subunit 3                             | Q15393 | SF3B3    | 136 | 6  | 7.30%  | 0.000397 |
| RNA-binding motif, single-stranded-interacting protein 2 | Q15434 | RBMS2    | 44  | 2  | 8.60%  | 0.000396 |
| Coatomer subunit alpha                                   | P53621 | COPA     | 138 | 6  | 7.50%  | 0.000395 |
| Probable ATP-dependent RNA helicase DDX23                | Q9BUQ8 | DDX23    | 96  | 4  | 6.50%  | 0.000393 |
| RNA cytidine acetyltransferase                           | Q9H0A0 | NAT10    | 116 | 5  | 8.10%  | 0.000393 |
| Structural maintenance of chromosomes protein 1A         | Q14683 | SMC1A    | 143 | 6  | 5.80%  | 0.000392 |
| DNA-dependent protein kinase catalytic subunit           | P78527 | PRKDC    | 469 | 18 | 6.40%  | 0.00039  |
| Casein kinase I isoform epsilon                          | P49674 | CSNK1E   | 47  | 2  | 7.00%  | 0.000387 |
| Importin-9                                               | Q96P70 | IPO9     | 116 | 3  | 6.10%  | 0.000387 |
| Calreticulin                                             | P27797 | CALR     | 48  | 2  | 11.00% | 0.000386 |
| Acylglycerol kinase, mitochondrial                       | Q53H12 | AGK      | 47  | 2  | 18.00% | 0.000382 |
| Dynactin subunit 1                                       | Q14203 | DCTN1    | 142 | 5  | 4.50%  | 0.000378 |
| Septin-11                                                | Q9NVA2 | SEPTIN11 | 49  | 2  | 7.90%  | 0.000375 |
| Eukaryotic translation initiation factor 5               | P55010 | EIF5     | 49  | 2  | 4.90%  | 0.000374 |
| Gem-associated protein 5                                 | Q8TEQ6 | GEMIN5   | 169 | 6  | 7.50%  | 0.000374 |
| DNA replication licensing factor MCM4                    | P33991 | MCM4     | 97  | 4  | 7.40%  | 0.000373 |
| Luc7-like protein 3                                      | O95232 | LUC7L3   | 51  | 2  | 6.50%  | 0.000373 |
| Pachytene checkpoint protein 2 homolog                   | Q15645 | TRIP13   | 49  | 2  | 4.90%  | 0.000373 |
| Protein PRRC2A                                           | P48634 | PRRC2A   | 229 | 10 | 9.30%  | 0.000373 |
| Splicing factor 3B subunit 1                             | O75533 | SF3B1    | 146 | 6  | 8.10%  | 0.000371 |

|                                                                             |        |         |     |    |        |          |
|-----------------------------------------------------------------------------|--------|---------|-----|----|--------|----------|
| Myosin-10                                                                   | P35580 | MYH10   | 229 | 9  | 8.40%  | 0.000367 |
| Arginine--tRNA ligase, cytoplasmic                                          | P54136 | RARS1   | 75  | 3  | 5.90%  | 0.000366 |
| KH domain-containing, RNA-binding, signal transduction-associated protein 1 | Q07666 | KHDRBS1 | 48  | 2  | 12.00% | 0.000364 |
| Cytoskeleton-associated protein 5                                           | Q14008 | CKAP5   | 226 | 9  | 8.10%  | 0.000357 |
| Peptidyl-prolyl cis-trans isomerase FKBP4                                   | Q02790 | FKBP4   | 52  | 2  | 6.80%  | 0.000351 |
| Serine/arginine repetitive matrix protein 2                                 | Q9UQ35 | SRRM2   | 300 | 10 | 6.00%  | 0.000351 |
| Microtubule-associated protein 4                                            | P27816 | MAP4    | 121 | 5  | 7.90%  | 0.00035  |
| Lamina-associated polypeptide 2, isoform alpha                              | P42166 | TMPO    | 75  | 3  | 7.90%  | 0.000348 |
| Glutamine--fructose-6-phosphate aminotransferase [isomerizing] 1            | Q06210 | GFPT1   | 79  | 3  | 6.30%  | 0.000346 |
| Splicing factor U2AF 65 kDa subunit                                         | P26368 | U2AF2   | 54  | 2  | 9.90%  | 0.000339 |
| Mitogen-activated protein kinase 6                                          | Q16659 | MAPK6   | 83  | 3  | 6.80%  | 0.000335 |
| Exportin-2                                                                  | P55060 | CSE1L   | 110 | 4  | 5.60%  | 0.000332 |
| Eukaryotic translation initiation factor 5B                                 | O60841 | EIF5B   | 139 | 5  | 6.60%  | 0.00033  |
| COP9 signalosome complex subunit 1                                          | Q13098 | GPS1    | 56  | 2  | 8.80%  | 0.000328 |
| Aspartate--tRNA ligase, cytoplasmic                                         | P14868 | DARS1   | 57  | 2  | 5.60%  | 0.000322 |
| Bifunctional glutamate/proline--tRNA ligase                                 | P07814 | EPRS1   | 171 | 6  | 6.50%  | 0.00032  |
| 6-phosphofructo-2-kinase/fructose-2,6-bisphosphatase 2                      | O60825 | PFKFB2  | 58  | 2  | 7.70%  | 0.000319 |
| Trifunctional purine biosynthetic protein adenosine-3                       | P22102 | GART    | 108 | 4  | 6.40%  | 0.000319 |
| DNA topoisomerase 1                                                         | P11387 | TOP1    | 91  | 3  | 6.30%  | 0.000316 |
| DNA-directed RNA polymerase I subunit RPA34                                 | O15446 | POLR1G  | 55  | 2  | 12.00% | 0.000316 |
| Coatomer subunit delta                                                      | P48444 | ARCN1   | 57  | 2  | 4.70%  | 0.000315 |
| Sodium/potassium-transporting ATPase subunit alpha-1                        | P05023 | ATP1A1  | 113 | 4  | 4.80%  | 0.000315 |
| Protein RCC2                                                                | Q9P258 | RCC2    | 56  | 2  | 5.40%  | 0.000309 |
| Trinucleotide repeat-containing gene 6B protein                             | Q9UPQ9 | TNRC6B  | 194 | 6  | 5.20%  | 0.000308 |
| Protein PRRC2C                                                              | Q9Y520 | PRRC2C  | 317 | 11 | 6.80%  | 0.000306 |
| Tyrosine--tRNA ligase, cytoplasmic                                          | P54577 | YARS1   | 59  | 2  | 7.00%  | 0.000305 |
| Cell division cycle 5-like protein                                          | Q99459 | CDC5L   | 92  | 3  | 9.10%  | 0.000301 |
| Pre-rRNA-processing protein TSR1 homolog                                    | Q2NL82 | TSR1    | 92  | 3  | 5.20%  | 0.000301 |
| SNW domain-containing protein 1                                             | Q13573 | SNW1    | 61  | 2  | 6.20%  | 0.000301 |
| Probable ATP-dependent RNA helicase DDX56                                   | Q9NY93 | DDX56   | 62  | 2  | 5.50%  | 0.000294 |
| Guanine nucleotide-binding protein-like 3                                   | Q9BVP2 | GNL3    | 62  | 2  | 4.70%  | 0.000293 |
| Constitutive coactivator of PPAR-gamma-like protein 1                       | Q9NZB2 | FAM120A | 122 | 4  | 5.20%  | 0.000288 |

|                                                                                    |        |          |     |   |        |          |
|------------------------------------------------------------------------------------|--------|----------|-----|---|--------|----------|
| Putative bifunctional UDP-N-acetylglucosamine transferase and deubiquitinase ALG13 | Q9NP73 | ALG13    | 126 | 4 | 4.90%  | 0.000283 |
| Heterogeneous nuclear ribonucleoprotein U-like protein 1                           | Q9BUJ2 | HNRNPUL1 | 96  | 2 | 4.20%  | 0.000282 |
| Ezrin                                                                              | P15311 | EZR      | 69  | 2 | 8.70%  | 0.000275 |
| CTP synthase 1                                                                     | P17812 | CTPS1    | 67  | 2 | 4.90%  | 0.000273 |
| TATA-binding protein-associated factor 2N                                          | Q92804 | TAF15    | 62  | 2 | 13.00% | 0.000272 |
| Transcription initiation factor TFIID subunit 2                                    | Q6P1X5 | TAF2     | 137 | 4 | 4.60%  | 0.000269 |
| DNA replication licensing factor MCM2                                              | P49736 | MCM2     | 102 | 3 | 4.10%  | 0.000267 |
| Mitogen-activated protein kinase kinase kinase 7                                   | O43318 | MAP3K7   | 67  | 2 | 4.10%  | 0.000266 |
| Ribonucleoprotein PTB-binding 1                                                    | Q8IY67 | RAVER1   | 64  | 2 | 7.60%  | 0.000266 |
| Structural maintenance of chromosomes protein 3                                    | Q9UQE7 | SMC3     | 142 | 4 | 4.00%  | 0.000265 |
| Cell cycle and apoptosis regulator protein 2                                       | Q8N163 | CCAR2    | 103 | 3 | 5.50%  | 0.000262 |
| Fragile X mental retardation syndrome-related protein 1                            | P51114 | FXR1     | 70  | 2 | 5.00%  | 0.000259 |
| Signal recognition particle subunit SRP68                                          | Q9UHB9 | SRP68    | 71  | 2 | 6.40%  | 0.000257 |
| Nucleolar GTP-binding protein 1                                                    | Q9BZE4 | GTPBP4   | 74  | 2 | 3.90%  | 0.000254 |
| Eukaryotic translation initiation factor 4 gamma 1                                 | Q04637 | EIF4G1   | 175 | 4 | 4.20%  | 0.000252 |
| Protein disulfide-isomerase A4                                                     | P13667 | PDIA4    | 73  | 2 | 3.90%  | 0.00025  |
| A-kinase anchor protein 8-like                                                     | Q9ULX6 | AKAP8L   | 72  | 2 | 6.30%  | 0.000249 |
| GRB10-interacting GYF protein 2                                                    | Q6Y7W6 | GIGYF2   | 150 | 4 | 4.80%  | 0.000248 |
| Signal recognition particle subunit SRP72                                          | O76094 | SRP72    | 75  | 2 | 4.20%  | 0.00024  |
| Importin-7                                                                         | O95373 | IPO7     | 120 | 3 | 4.10%  | 0.000233 |
| GMP synthase [glutamine-hydrolyzing]                                               | P49915 | GMPS     | 77  | 2 | 3.50%  | 0.000232 |
| TGF-beta-activated kinase 1 and MAP3K7-binding protein 2                           | Q9NYJ8 | TAB2     | 76  | 2 | 4.60%  | 0.000232 |
| La-related protein 1                                                               | Q6PKG0 | LARP1    | 124 | 2 | 3.30%  | 0.00022  |
| Alpha-adducin                                                                      | P35611 | ADD1     | 81  | 2 | 5.30%  | 0.000219 |
| Ubiquitin carboxyl-terminal hydrolase 7                                            | Q93009 | USP7     | 128 | 3 | 4.00%  | 0.000219 |
| OTU domain-containing protein 4                                                    | Q01804 | OTUD4    | 124 | 3 | 5.00%  | 0.000217 |
| Transducin-like enhancer protein 3                                                 | Q04726 | TLE3     | 83  | 2 | 3.40%  | 0.000209 |
| ATP-dependent 6-phosphofructokinase, liver type                                    | P17858 | PFKL     | 85  | 2 | 4.70%  | 0.000207 |
| Probable ATP-dependent RNA helicase DHX40                                          | Q8IX18 | DHX40    | 89  | 2 | 3.60%  | 0.000207 |
| Rabankyrin-5                                                                       | Q9P2R3 | ANKFY1   | 128 | 3 | 3.70%  | 0.000207 |
| Structural maintenance of chromosomes protein 2                                    | O95347 | SMC2     | 136 | 3 | 3.80%  | 0.000202 |
| Vacuolar protein sorting-associated protein 35                                     | Q96QK1 | VPS35    | 92  | 2 | 4.40%  | 0.000202 |
| Cullin-associated NEDD8-dissociated protein 1                                      | Q86VP6 | CAND1    | 136 | 3 | 3.50%  | 0.000196 |

|                                                                            |        |         |     |   |       |          |
|----------------------------------------------------------------------------|--------|---------|-----|---|-------|----------|
| Transforming acidic coiled-coil-containing protein 3                       | Q9Y6A5 | TACC3   | 90  | 2 | 6.20% | 0.000192 |
| Structural maintenance of chromosomes protein 4                            | Q9NTJ3 | SMC4    | 147 | 3 | 3.60% | 0.000188 |
| N-alpha-acetyltransferase 15, NatA auxiliary subunit                       | Q9BXJ9 | NAA15   | 101 | 2 | 4.00% | 0.000186 |
| Ataxin-2                                                                   | Q99700 | ATXN2   | 140 | 3 | 3.50% | 0.000184 |
| Coatomer subunit gamma-1                                                   | Q9Y678 | COPG1   | 98  | 2 | 3.80% | 0.000184 |
| A-kinase anchor protein 12                                                 | Q02952 | AKAP12  | 191 | 3 | 2.60% | 0.000181 |
| CWF19-like protein 2                                                       | Q2TBE0 | CWF19L2 | 104 | 2 | 3.20% | 0.00018  |
| Transportin-1                                                              | Q92973 | TNPO1   | 102 | 2 | 2.60% | 0.000179 |
| Eukaryotic translation initiation factor 4 gamma 2                         | P78344 | EIF4G2  | 102 | 2 | 3.30% | 0.000178 |
| Serine/arginine repetitive matrix protein 1                                | Q8IYB3 | SRRM1   | 102 | 2 | 5.60% | 0.000178 |
| Cullin-4B                                                                  | Q13620 | CUL4B   | 104 | 2 | 4.10% | 0.000176 |
| 5'-3' exoribonuclease 2                                                    | Q9H0D6 | XRN2    | 109 | 2 | 4.60% | 0.00017  |
| Coatomer subunit beta                                                      | P53618 | COPB1   | 107 | 2 | 3.80% | 0.000169 |
| General vesicular transport factor p115                                    | O60763 | USO1    | 108 | 2 | 3.10% | 0.000167 |
| RNA-binding protein 26                                                     | Q5T8P6 | RBM26   | 114 | 2 | 2.70% | 0.00016  |
| Condensin complex subunit 3                                                | Q9BPX3 | NCAPG   | 114 | 2 | 2.70% | 0.000159 |
| U2 snRNP-associated SURP motif-containing protein                          | O15042 | U2SURP  | 118 | 2 | 4.90% | 0.000157 |
| Sarcoplasmic/endoplasmic reticulum calcium ATPase 2                        | P16615 | ATP2A2  | 115 | 2 | 2.70% | 0.000155 |
| FACT complex subunit SPT16                                                 | Q9Y5B9 | SUPT16H | 120 | 2 | 2.60% | 0.000154 |
| RNA-binding protein 27                                                     | Q9P2N5 | RBM27   | 119 | 2 | 2.70% | 0.000152 |
| Clathrin heavy chain 1                                                     | Q00610 | CLTC    | 192 | 2 | 1.70% | 0.000144 |
| ELKS/Rab6-interacting/CAST family member 1                                 | Q8IUD2 | ERC1    | 128 | 2 | 5.20% | 0.000144 |
| DNA damage-binding protein 1                                               | Q16531 | DDB1    | 127 | 2 | 3.50% | 0.000141 |
| Protogenin                                                                 | Q2VWP7 | PRTG    | 127 | 2 | 5.30% | 0.00014  |
| DNA-directed RNA polymerase II subunit RPB2                                | P30876 | POLR2B  | 134 | 2 | 2.90% | 0.000137 |
| Exportin-5                                                                 | Q9HAV4 | XPO5    | 136 | 2 | 2.10% | 0.000134 |
| Histone deacetylase 6                                                      | Q9UBN7 | HDAC6   | 131 | 2 | 4.90% | 0.000133 |
| Protein flightless-1 homolog                                               | Q13045 | FLII    | 145 | 2 | 1.90% | 0.000127 |
| Ankyrin repeat domain-containing protein 17                                | O75179 | ANKRD17 | 274 | 4 | 7.10% | 0.000124 |
| CLIP-associating protein 2                                                 | O75122 | CLASP2  | 141 | 2 | 2.50% | 0.000124 |
| Filamin-B                                                                  | O75369 | FLNB    | 278 | 4 | 3.00% | 0.000124 |
| Sister chromatid cohesion protein PDS5 homolog A                           | Q29RF7 | PDS5A   | 151 | 2 | 2.20% | 0.00012  |
| Nascent polypeptide-associated complex subunit alpha, muscle-specific form | E9PAV3 | NACA    | 205 | 2 | 1.40% | 0.000116 |

|          |                                                              |        |         |     |    |        |          |
|----------|--------------------------------------------------------------|--------|---------|-----|----|--------|----------|
|          | Protein PRRC2B                                               | Q5JSZ5 | PRRC2B  | 243 | 3  | 2.30%  | 0.000108 |
|          | Ras GTPase-activating-like protein IQGAP1                    | P46940 | IQGAP1  | 189 | 2  | 2.40%  | 9.72E-05 |
|          | Xin actin-binding repeat-containing protein 1                | Q702N8 | XIRP1   | 199 | 2  | 2.60%  | 8.74E-05 |
|          | Nuclear pore complex protein Nup205                          | Q92621 | NUP205  | 228 | 2  | 1.40%  | 8.01E-05 |
|          | Acetyl-CoA carboxylase 2                                     | O00763 | ACACB   | 277 | 2  | 7.40%  | 6.55E-05 |
|          | Probable ubiquitin carboxyl-terminal hydrolase FAF-X         | Q93008 | USP9X   | 290 | 2  | 0.86%  | 6.31E-05 |
|          | E3 ubiquitin-protein ligase HUWE1                            | Q7Z6Z7 | HUWE1   | 482 | 2  | 0.78%  | 3.68E-05 |
|          | Dynein heavy chain 10, axonemal                              | Q8IVF4 | DNAH10  | 515 | 2  | 1.80%  | 0.000036 |
|          | Sacsin                                                       | Q9NZJ4 | SACS    | 521 | 2  | 1.00%  | 3.52E-05 |
|          | Cytoplasmic dynein 1 heavy chain 1                           | Q14204 | DYNC1H1 | 532 | 2  | 0.82%  | 3.47E-05 |
| RNA5SP44 | Zinc finger CCCH-type with G patch domain-containing protein | Q8N5A5 | ZGPAT   | 57  | 43 | 76.00% | 0.0582   |
|          | 60S ribosomal protein L38                                    | P63173 | RPL38   | 8   | 5  | 57.00% | 0.0243   |
|          | Thiosulfate sulfurtransferase                                | Q16762 | TST     | 33  | 16 | 67.00% | 0.0123   |
|          | 40S ribosomal protein S25                                    | P62851 | RPS25   | 14  | 9  | 55.00% | 0.0117   |
|          | Non-POU domain-containing octamer-binding protein            | Q15233 | NONO    | 54  | 29 | 57.00% | 0.0117   |
|          | Translation machinery-associated protein 7                   | Q9Y2S6 | TMA7    | 7   | 4  | 41.00% | 0.0114   |
|          | 40S ribosomal protein S19                                    | P39019 | RPS19   | 16  | 11 | 52.00% | 0.00951  |
|          | Heterogeneous nuclear ribonucleoprotein M                    | P52272 | HNRNPM  | 78  | 28 | 48.00% | 0.00889  |
|          | Pre-mRNA-splicing factor ATP-dependent RNA helicase DHX15    | O43143 | DHX15   | 91  | 36 | 43.00% | 0.00878  |
|          | 40S ribosomal protein S7                                     | P62081 | RPS7    | 22  | 12 | 60.00% | 0.00795  |
|          | 40S ribosomal protein S17                                    | P08708 | RPS17   | 16  | 6  | 44.00% | 0.00781  |
|          | Epithelial splicing regulatory protein 2                     | Q9H6T0 | ESRP2   | 78  | 27 | 48.00% | 0.00781  |
|          | 40S ribosomal protein S10                                    | P46783 | RPS10   | 19  | 10 | 47.00% | 0.00738  |
|          | 40S ribosomal protein S18                                    | P62269 | RPS18   | 18  | 11 | 44.00% | 0.00694  |
|          | 40S ribosomal protein S16                                    | P62249 | RPS16   | 16  | 7  | 41.00% | 0.00667  |
|          | Tubulin beta chain                                           | P07437 | TUBB    | 50  | 19 | 50.00% | 0.0064   |
|          | Splicing factor, proline- and glutamine-rich                 | P23246 | SFPQ    | 76  | 29 | 46.00% | 0.00631  |
|          | Enhancer of rudimentary homolog                              | P84090 | ERH     | 12  | 6  | 57.00% | 0.00624  |
|          | Nucleolin                                                    | P19338 | NCL     | 77  | 39 | 51.00% | 0.00617  |
|          | Eukaryotic translation initiation factor 4B                  | P23588 | EIF4B   | 69  | 21 | 40.00% | 0.00611  |
|          | Interleukin enhancer-binding factor 2                        | Q12905 | ILF2    | 43  | 18 | 59.00% | 0.00603  |
|          | 60S ribosomal protein L23                                    | P62829 | RPL23   | 15  | 4  | 21.00% | 0.0058   |
|          | Heterogeneous nuclear ribonucleoprotein H                    | P31943 | HNRNPH1 | 49  | 14 | 40.00% | 0.00578  |
|          | Histone H1.2                                                 | P16403 | H1-2    | 21  | 12 | 39.00% | 0.00571  |

|                                                            |             |           |     |    |        |         |
|------------------------------------------------------------|-------------|-----------|-----|----|--------|---------|
| Heat shock 70 kDa protein 1B                               | P0DMV9      | HSPA1B    | 70  | 29 | 50.00% | 0.0057  |
| T-complex protein 1 subunit epsilon                        | P48643      | CCT5      | 60  | 22 | 50.00% | 0.00555 |
| 40S ribosomal protein S20                                  | P60866      | RPS20     | 13  | 4  | 26.00% | 0.00545 |
| Small nuclear ribonucleoprotein Sm D1                      | P62314      | SNRPD1    | 13  | 3  | 37.00% | 0.00545 |
| Tubulin alpha-1B chain                                     | P68363      | TUBA1B    | 50  | 14 | 48.00% | 0.0054  |
| 40S ribosomal protein S14                                  | P62263      | RPS14     | 16  | 6  | 34.00% | 0.00537 |
| 40S ribosomal protein S3                                   | P23396      | RPS3      | 27  | 13 | 58.00% | 0.00534 |
| Plasminogen activator inhibitor 1 RNA-binding protein      | Q8NC51      | SERBP1    | 45  | 15 | 40.00% | 0.00517 |
| Actin, cytoplasmic 2                                       | P63261      | ACTG1     | 42  | 14 | 51.00% | 0.00498 |
| Peptidyl-prolyl cis-trans isomerase NIMA-interacting 4     | Q9Y237      | PIN4      | 14  | 5  | 43.00% | 0.00495 |
| Multiple myeloma tumor-associated protein 2                | Q9BU76      | MMTAG2    | 29  | 12 | 34.00% | 0.00494 |
| Elongation factor 1-alpha 1                                | P68104      | EEF1A1    | 50  | 14 | 46.00% | 0.00492 |
| Protein arginine N-methyltransferase 5                     | O14744      | PRMT5     | 73  | 22 | 43.00% | 0.00484 |
| 40S ribosomal protein S5                                   | P46782      | RPS5      | 23  | 6  | 37.00% | 0.00477 |
| Protein phosphatase 1B                                     | O75688      | PPM1B     | 53  | 16 | 38.00% | 0.00474 |
| Immunoglobulin kappa variable 2D-29                        | A0A075B6S   | IGKV2D-29 | 13  | 2  | 17.00% | 0.00473 |
| Cold-inducible RNA-binding protein                         | Q14011      | CIRBP     | 19  | 7  | 37.00% | 0.00472 |
| U4/U6 small nuclear ribonucleoprotein Prp31                | Q8WWY3      | PRPF31    | 55  | 17 | 46.00% | 0.00472 |
| 60S ribosomal protein L22-like 1                           | Q6P5R6      | RPL22L1   | 15  | 4  | 52.00% | 0.00466 |
| 60S ribosomal protein L9                                   | P32969      | RPL9      | 22  | 8  | 55.00% | 0.00465 |
| 40S ribosomal protein S4, X isoform                        | P62701      | RPS4X     | 30  | 13 | 38.00% | 0.00463 |
| 40S ribosomal protein S3a                                  | P61247      | RPS3A     | 30  | 12 | 38.00% | 0.00461 |
| Heterogeneous nuclear ribonucleoprotein A1                 | P09651      | HNRNPA1   | 39  | 12 | 36.00% | 0.00458 |
| Eukaryotic translation initiation factor 1A, Y-chromosomal | O14602      | EIF1AY    | 16  | 5  | 51.00% | 0.00451 |
| Histone H2A type 2-C                                       | Q16777 (+1) | H2AC20    | 14  | 4  | 53.00% | 0.0044  |
| Endothelial differentiation-related factor 1               | O60869      | EDF1      | 16  | 6  | 41.00% | 0.00439 |
| 40S ribosomal protein S30                                  | P62861      | FAU       | 7   | 3  | 20.00% | 0.00413 |
| Peptidyl-prolyl cis-trans isomerase H                      | O43447      | PPIH      | 19  | 6  | 49.00% | 0.00413 |
| 60S ribosomal protein L13                                  | P26373      | RPL13     | 24  | 5  | 22.00% | 0.00385 |
| Interleukin enhancer-binding factor 3                      | Q12906      | ILF3      | 95  | 29 | 49.00% | 0.00381 |
| 60S ribosomal protein L22                                  | P35268      | RPL22     | 15  | 4  | 41.00% | 0.0038  |
| ATP-dependent RNA helicase A                               | Q08211      | DHX9      | 141 | 35 | 35.00% | 0.00377 |
| Heat shock cognate 71 kDa protein                          | P11142      | HSPA8     | 71  | 24 | 46.00% | 0.00377 |
| Eukaryotic translation initiation factor 5A-1              | P63241      | EIF5A     | 17  | 4  | 34.00% | 0.00369 |



|                                                                |             |           |     |    |        |         |
|----------------------------------------------------------------|-------------|-----------|-----|----|--------|---------|
| Acetyl-CoA carboxylase 1                                       | Q13085      | ACACA     | 266 | 74 | 43.00% | 0.00367 |
| Peroxiredoxin-1                                                | Q06830      | PRDX1     | 22  | 8  | 29.00% | 0.00367 |
| 40S ribosomal protein S24                                      | P62847      | RPS24     | 15  | 3  | 21.00% | 0.00366 |
| 60S ribosomal protein L23a                                     | P62750      | RPL23A    | 18  | 6  | 47.00% | 0.00364 |
| Protein FAM32A                                                 | Q9Y421      | FAM32A    | 13  | 4  | 31.00% | 0.00362 |
| 40S ribosomal protein S28                                      | P62857      | RPS28     | 8   | 3  | 28.00% | 0.00353 |
| Small nuclear ribonucleoprotein Sm D2                          | P62316      | SNRPD2    | 14  | 3  | 25.00% | 0.00344 |
| U4/U6 small nuclear ribonucleoprotein Prp3                     | O43395      | PRPF3     | 78  | 22 | 31.00% | 0.00344 |
| Serine/threonine-protein kinase 38                             | Q15208      | STK38     | 54  | 15 | 35.00% | 0.00332 |
| Poly [ADP-ribose] polymerase 1                                 | P09874      | PARP1     | 113 | 29 | 37.00% | 0.00328 |
| Y-box-binding protein 1                                        | P67809      | YBX1      | 36  | 9  | 48.00% | 0.00326 |
| 60S ribosomal protein L31                                      | P62899      | RPL31     | 14  | 5  | 41.00% | 0.00325 |
| Heat shock protein HSP 90-beta                                 | P08238      | HSP90AB1  | 83  | 20 | 34.00% | 0.00325 |
| Heterogeneous nuclear ribonucleoproteins A2/B1                 | P22626      | HNRNPA2B1 | 37  | 10 | 31.00% | 0.00322 |
| THO complex subunit 4                                          | Q86V81      | ALYREF    | 27  | 8  | 39.00% | 0.00316 |
| 40S ribosomal protein S15a                                     | P62244      | RPS15A    | 15  | 4  | 27.00% | 0.00312 |
| Spindlin-1                                                     | Q9Y657      | SPIN1     | 30  | 6  | 33.00% | 0.0031  |
| 40S ribosomal protein S11                                      | P62280      | RPS11     | 18  | 5  | 28.00% | 0.00308 |
| Signal recognition particle 14 kDa protein                     | P37108      | SRP14     | 15  | 3  | 31.00% | 0.00298 |
| Spindlin interactor and repressor of chromatin-binding protein | Q9BUA3      | SPINDOC   | 41  | 11 | 55.00% | 0.00298 |
| U4/U6 small nuclear ribonucleoprotein Prp4                     | O43172      | PRPF4     | 58  | 15 | 33.00% | 0.00295 |
| Coiled-coil domain-containing protein 124                      | Q96CT7      | CCDC124   | 26  | 7  | 28.00% | 0.00291 |
| Methylosome protein 50                                         | Q9BQA1      | WDR77     | 37  | 8  | 53.00% | 0.00285 |
| Reticulocalbin-2                                               | Q14257      | RCN2      | 37  | 6  | 37.00% | 0.00282 |
| 60S ribosomal protein L26                                      | P61254      | RPL26     | 17  | 5  | 31.00% | 0.0028  |
| X-ray repair cross-complementing protein 6                     | P12956      | XRCC6     | 70  | 18 | 38.00% | 0.0028  |
| RNA-binding protein FUS                                        | P35637      | FUS       | 53  | 10 | 22.00% | 0.00278 |
| Methylosome subunit pICln                                      | P54105      | CLNS1A    | 26  | 2  | 21.00% | 0.00274 |
| Thyroid hormone receptor-associated protein 3                  | Q9Y2W1      | THRAP3    | 109 | 20 | 24.00% | 0.00272 |
| RNA-binding protein 10                                         | P98175      | RBM10     | 104 | 27 | 41.00% | 0.0027  |
| 28 kDa heat- and acid-stable phosphoprotein                    | Q13442      | PDAP1     | 21  | 3  | 17.00% | 0.00269 |
| Heterogeneous nuclear ribonucleoprotein A0                     | Q13151      | HNRNPA0   | 31  | 7  | 34.00% | 0.00266 |
| High mobility group protein B1                                 | P09429      | HMGB1     | 25  | 6  | 27.00% | 0.00264 |
| Histone H2B type 1-K                                           | O60814 (+2) | H2BC12    | 14  | 2  | 19.00% | 0.00258 |

|                                                             |        |         |     |    |        |         |
|-------------------------------------------------------------|--------|---------|-----|----|--------|---------|
| Activated RNA polymerase II transcriptional coactivator p15 | P53999 | SUB1    | 14  | 3  | 31.00% | 0.00256 |
| Cancer-related nucleoside-triphosphatase                    | Q9BSD7 | NTPCR   | 21  | 4  | 31.00% | 0.00256 |
| Transitional endoplasmic reticulum ATPase                   | P55072 | VCP     | 89  | 20 | 36.00% | 0.00252 |
| T-complex protein 1 subunit alpha                           | P17987 | TCP1    | 60  | 12 | 35.00% | 0.00248 |
| 26S proteasome regulatory subunit 8                         | P62195 | PSMC5   | 46  | 10 | 31.00% | 0.0024  |
| Heterogeneous nuclear ribonucleoprotein A3                  | P51991 | HNRNPA3 | 40  | 8  | 25.00% | 0.00236 |
| Elongation factor Tu, mitochondrial                         | P49411 | TUFM    | 50  | 11 | 33.00% | 0.00233 |
| High mobility group protein B2                              | P26583 | HMGB2   | 24  | 5  | 24.00% | 0.00233 |
| ATP synthase subunit beta, mitochondrial                    | P06576 | ATP5F1B | 57  | 10 | 31.00% | 0.0023  |
| Heterogeneous nuclear ribonucleoprotein D0                  | Q14103 | HNRNPD  | 38  | 8  | 21.00% | 0.00229 |
| 40S ribosomal protein S6                                    | P62753 | RPS6    | 29  | 5  | 20.00% | 0.00228 |
| 60S ribosomal protein L11                                   | P62913 | RPL11   | 20  | 4  | 23.00% | 0.00228 |
| 40S ribosomal protein S15                                   | P62841 | RPS15   | 17  | 3  | 41.00% | 0.00224 |
| Developmentally-regulated GTP-binding protein 1             | Q9Y295 | DRG1    | 41  | 8  | 30.00% | 0.00221 |
| 60S ribosomal protein L17                                   | P18621 | RPL17   | 21  | 5  | 29.00% | 0.0022  |
| 60S ribosomal protein L27a                                  | P46776 | RPL27A  | 17  | 4  | 24.00% | 0.00219 |
| Squamous cell carcinoma antigen recognized by T-cells 3     | Q15020 | SART3   | 110 | 20 | 29.00% | 0.00219 |
| Myosin light polypeptide 6                                  | P60660 | MYL6    | 17  | 3  | 46.00% | 0.00215 |
| T-complex protein 1 subunit zeta                            | P40227 | CCT6A   | 58  | 8  | 27.00% | 0.00214 |
| U4/U6.U5 tri-snRNP-associated protein 1                     | O43290 | SART1   | 90  | 18 | 30.00% | 0.00213 |
| 40S ribosomal protein S26                                   | P62854 | RPS26   | 13  | 2  | 21.00% | 0.00212 |
| T-complex protein 1 subunit beta                            | P78371 | CCT2    | 57  | 12 | 39.00% | 0.00212 |
| Endoplasmic reticulum chaperone BiP                         | P11021 | HSPA5   | 72  | 14 | 31.00% | 0.00211 |
| X-ray repair cross-complementing protein 5                  | P13010 | XRCC5   | 83  | 14 | 34.00% | 0.00211 |
| Heterogeneous nuclear ribonucleoprotein K                   | P61978 | HNRNPK  | 51  | 9  | 26.00% | 0.0021  |
| Ras GTPase-activating protein-binding protein 1             | Q13283 | G3BP1   | 52  | 11 | 47.00% | 0.00209 |
| Heterogeneous nuclear ribonucleoprotein Q                   | O60506 | SYNCRIP | 70  | 14 | 30.00% | 0.00208 |
| 60S ribosomal protein L24                                   | P83731 | RPL24   | 18  | 2  | 16.00% | 0.00207 |
| RNA-binding protein 3                                       | P98179 | RBM3    | 17  | 4  | 35.00% | 0.00207 |
| 26S proteasome regulatory subunit 7                         | P35998 | PSMC2   | 49  | 9  | 31.00% | 0.00206 |
| RNA-binding protein Musashi homolog 1                       | O43347 | MSI1    | 39  | 8  | 37.00% | 0.00202 |
| Mth938 domain-containing protein                            | Q9H7C9 | AAMDC   | 13  | 3  | 27.00% | 0.002   |
| Translation machinery-associated protein 16                 | Q96EY4 | TMA16   | 24  | 4  | 28.00% | 0.002   |
| 60S ribosomal protein L35                                   | P42766 | RPL35   | 15  | 3  | 22.00% | 0.00198 |

|                                                          |        |          |     |    |        |         |
|----------------------------------------------------------|--------|----------|-----|----|--------|---------|
| Insulin-like growth factor 2 mRNA-binding protein 1      | Q9NZI8 | IGF2BP1  | 63  | 10 | 23.00% | 0.00197 |
| Peptidyl-prolyl cis-trans isomerase A                    | P62937 | PPIA     | 18  | 4  | 36.00% | 0.00197 |
| Cofilin-1                                                | P23528 | CFL1     | 19  | 3  | 23.00% | 0.00196 |
| T-complex protein 1 subunit delta                        | P50991 | CCT4     | 58  | 9  | 31.00% | 0.00196 |
| 40S ribosomal protein S8                                 | P62241 | RPS8     | 24  | 3  | 19.00% | 0.00195 |
| Splicing factor 3B subunit 6                             | Q9Y3B4 | SF3B6    | 15  | 2  | 21.00% | 0.00195 |
| Glyceraldehyde-3-phosphate dehydrogenase                 | P04406 | GAPDH    | 36  | 6  | 26.00% | 0.00194 |
| T-complex protein 1 subunit gamma                        | P49368 | CCT3     | 61  | 10 | 23.00% | 0.00194 |
| Transcription intermediary factor 1-beta                 | Q13263 | TRIM28   | 89  | 17 | 29.00% | 0.00194 |
| Histone H1.10                                            | Q92522 | H1-10    | 22  | 4  | 26.00% | 0.0019  |
| 26S proteasome regulatory subunit 10B                    | P62333 | PSMC6    | 44  | 9  | 29.00% | 0.00188 |
| 28S ribosomal protein S21, mitochondrial                 | P82921 | MRPS21   | 11  | 2  | 30.00% | 0.00187 |
| Heterogeneous nuclear ribonucleoprotein U                | Q00839 | HNRNPU   | 91  | 16 | 23.00% | 0.00187 |
| Retinitis pigmentosa 9 protein                           | Q8TA86 | RP9      | 26  | 4  | 16.00% | 0.00184 |
| RNA-binding protein 39                                   | Q14498 | RBM39    | 59  | 11 | 21.00% | 0.00184 |
| T-complex protein 1 subunit eta                          | Q99832 | CCT7     | 59  | 10 | 29.00% | 0.00179 |
| Heat shock protein HSP 90-alpha                          | P07900 | HSP90AA1 | 85  | 14 | 37.00% | 0.00177 |
| TGF-beta-activated kinase 1 and MAP3K7-binding protein 1 | Q15750 | TAB1     | 55  | 10 | 32.00% | 0.00177 |
| Protein LSM14 homolog A                                  | Q8ND56 | LSM14A   | 51  | 8  | 32.00% | 0.00175 |
| Serine/threonine-protein kinase 38-like                  | Q9Y2H1 | STK38L   | 54  | 6  | 17.00% | 0.00175 |
| Elongation factor 1-delta                                | P29692 | EEF1D    | 31  | 4  | 22.00% | 0.00173 |
| Paraspeckle component 1                                  | Q8WXF1 | PSPC1    | 59  | 9  | 29.00% | 0.00171 |
| U6 snRNA-associated Sm-like protein LSM2                 | Q9Y333 | LSM2     | 11  | 2  | 40.00% | 0.00171 |
| 40S ribosomal protein S23                                | P62266 | RPS23    | 16  | 3  | 16.00% | 0.0017  |
| Nucleolar protein of 40 kDa                              | Q9NP64 | ZCCHC17  | 28  | 4  | 23.00% | 0.00168 |
| 26S proteasome regulatory subunit 4                      | P62191 | PSMC1    | 49  | 9  | 28.00% | 0.00166 |
| 26S proteasome regulatory subunit 6A                     | P17980 | PSMC3    | 49  | 8  | 31.00% | 0.00166 |
| 40S ribosomal protein S2                                 | P15880 | RPS2     | 31  | 5  | 19.00% | 0.00166 |
| 60S ribosomal protein L19                                | P84098 | RPL19    | 23  | 4  | 14.00% | 0.00166 |
| Ubiquitin-associated protein 2-like                      | Q14157 | UBAP2L   | 115 | 16 | 28.00% | 0.00164 |
| Ribosomal biogenesis factor                              | Q8N0T1 | RBIS     | 11  | 2  | 29.00% | 0.00162 |
| 40S ribosomal protein S13                                | P62277 | RPS13    | 17  | 2  | 17.00% | 0.00161 |
| Cysteine-rich PDZ-binding protein                        | Q9P021 | CRIP1    | 11  | 2  | 12.00% | 0.00161 |
| Far upstream element-binding protein 2                   | Q92945 | KHSRP    | 73  | 13 | 27.00% | 0.0016  |

|                                                              |        |          |     |    |        |         |
|--------------------------------------------------------------|--------|----------|-----|----|--------|---------|
| ATP-dependent RNA helicase DDX3X                             | O00571 | DDX3X    | 73  | 10 | 20.00% | 0.00159 |
| Probable ATP-dependent RNA helicase DDX5                     | P17844 | DDX5     | 69  | 11 | 24.00% | 0.00159 |
| U6 snRNA-associated Sm-like protein LSM3                     | P62310 | LSM3     | 12  | 2  | 33.00% | 0.00159 |
| c-Myc-binding protein                                        | Q99417 | MYCBP    | 12  | 2  | 27.00% | 0.00158 |
| Serine/threonine-protein kinase RIO1                         | Q9BRS2 | RIOK1    | 66  | 8  | 17.00% | 0.00157 |
| 6-phosphofructo-2-kinase/fructose-2,6-bisphosphatase 3       | Q16875 | PFKFB3   | 60  | 9  | 22.00% | 0.00156 |
| NF-kappa-B-activating protein                                | Q8N5F7 | NKAP     | 47  | 4  | 13.00% | 0.00156 |
| 26S proteasome regulatory subunit 6B                         | P43686 | PSMC4    | 47  | 6  | 32.00% | 0.00155 |
| Protein LTV1 homolog                                         | Q96GA3 | LTV1     | 55  | 7  | 20.00% | 0.00154 |
| Y-box-binding protein 3                                      | P16989 | YBX3     | 40  | 6  | 58.00% | 0.00153 |
| 60S ribosomal protein L10                                    | P27635 | RPL10    | 25  | 2  | 6.50%  | 0.00152 |
| Eukaryotic translation initiation factor 3 subunit G         | O75821 | EIF3G    | 36  | 5  | 13.00% | 0.00152 |
| High mobility group protein HMG-I/HMG-Y                      | P17096 | HMGA1    | 12  | 2  | 23.00% | 0.00152 |
| rRNA 2'-O-methyltransferase fibrillarin                      | P22087 | FBL      | 34  | 4  | 15.00% | 0.00152 |
| E3 ubiquitin-protein ligase RBX1                             | P62877 | RBX1     | 12  | 2  | 19.00% | 0.0015  |
| Eukaryotic translation initiation factor 3 subunit I         | Q13347 | EIF3I    | 37  | 6  | 31.00% | 0.0015  |
| Importin-8                                                   | O15397 | IPO8     | 120 | 15 | 21.00% | 0.00149 |
| ATP synthase subunit alpha, mitochondrial                    | P25705 | ATP5F1A  | 60  | 10 | 24.00% | 0.00147 |
| Prothymosin alpha                                            | P06454 | PTMA     | 12  | 2  | 25.00% | 0.00146 |
| Heterogeneous nuclear ribonucleoprotein H2                   | P55795 | HNRNPH2  | 49  | 6  | 30.00% | 0.00145 |
| Peptidyl-prolyl cis-trans isomerase FKBP3                    | Q00688 | FKBP3    | 25  | 4  | 24.00% | 0.00145 |
| Probable ATP-dependent RNA helicase DDX17                    | Q92841 | DDX17    | 80  | 12 | 20.00% | 0.00145 |
| Elongation factor 1-beta                                     | P24534 | EEF1B2   | 25  | 3  | 16.00% | 0.00144 |
| Cleavage and polyadenylation specificity factor subunit 5    | O43809 | NUDT21   | 26  | 4  | 33.00% | 0.00143 |
| Elongation factor 2                                          | P13639 | EEF2     | 95  | 11 | 20.00% | 0.00142 |
| Myosin regulatory light chain 12A                            | P19105 | MYL12A   | 20  | 3  | 18.00% | 0.00142 |
| Double-stranded RNA-binding protein Staufen homolog 1        | O95793 | STAU1    | 63  | 10 | 22.00% | 0.00141 |
| Heterogeneous nuclear ribonucleoprotein R                    | O43390 | HNRNPR   | 71  | 8  | 22.00% | 0.00141 |
| Influenza virus NS1A-binding protein                         | Q9Y6Y0 | IVNS1ABP | 72  | 7  | 20.00% | 0.00139 |
| DNA topoisomerase 1                                          | P11387 | TOP1     | 91  | 10 | 17.00% | 0.00138 |
| 26S proteasome non-ATPase regulatory subunit 3               | O43242 | PSMD3    | 61  | 9  | 27.00% | 0.00137 |
| Cyclin-dependent kinase 1                                    | P06493 | CDK1     | 34  | 5  | 25.00% | 0.00137 |
| ADP/ATP translocase 2                                        | P05141 | SLC25A5  | 33  | 4  | 11.00% | 0.00136 |
| ADP-ribosylation factor-like protein 6-interacting protein 4 | Q66PJ3 | ARL6IP4  | 45  | 6  | 13.00% | 0.00135 |

|                                                                         |        |         |     |    |        |         |
|-------------------------------------------------------------------------|--------|---------|-----|----|--------|---------|
| Insulin-like growth factor 2 mRNA-binding protein 2                     | Q9Y6M1 | IGF2BP2 | 66  | 8  | 22.00% | 0.00135 |
| Fructose-bisphosphate aldolase A                                        | P04075 | ALDOA   | 39  | 4  | 19.00% | 0.00134 |
| Multifunctional protein ADE2                                            | P22234 | PAICS   | 47  | 6  | 20.00% | 0.00134 |
| Poly(rC)-binding protein 2                                              | Q15366 | PCBP2   | 39  | 5  | 26.00% | 0.00133 |
| RNA transcription, translation and transport factor protein             | Q9Y224 | RTRAF   | 28  | 3  | 19.00% | 0.00133 |
| Selenoprotein H                                                         | Q8IZQ5 | SELENOH | 13  | 2  | 19.00% | 0.00133 |
| Zinc finger CCCH domain-containing protein 15                           | Q8WU90 | ZC3H15  | 49  | 7  | 24.00% | 0.00133 |
| Coordinator of PRMT5 and differentiation stimulator                     | Q9NQ92 | COPRS   | 20  | 2  | 21.00% | 0.00132 |
| 26S proteasome non-ATPase regulatory subunit 14                         | O00487 | PSMD14  | 35  | 5  | 36.00% | 0.00131 |
| Multifunctional methyltransferase subunit TRM112-like protein           | Q9UI30 | TRMT112 | 14  | 2  | 22.00% | 0.0013  |
| 60S ribosomal protein L18                                               | Q07020 | RPL18   | 22  | 3  | 19.00% | 0.00129 |
| DNA-(apurinic or apyrimidinic site) endonuclease                        | P27695 | APEX1   | 36  | 5  | 22.00% | 0.00128 |
| Flap endonuclease 1                                                     | P39748 | FEN1    | 43  | 6  | 21.00% | 0.00128 |
| Negative elongation factor E                                            | P18615 | NELFE   | 43  | 6  | 21.00% | 0.00128 |
| Phenylalanine--tRNA ligase alpha subunit                                | Q9Y285 | FARSA   | 58  | 7  | 21.00% | 0.00128 |
| AP-3 complex subunit sigma-1                                            | Q92572 | AP3S1   | 22  | 3  | 31.00% | 0.00126 |
| Protein FRG1                                                            | Q14331 | FRG1    | 29  | 4  | 20.00% | 0.00126 |
| 40S ribosomal protein S9                                                | P46781 | RPS9    | 23  | 3  | 15.00% | 0.00125 |
| Arf-GAP with coiled-coil, ANK repeat and PH domain-containing protein 2 | Q15057 | ACAP2   | 88  | 10 | 20.00% | 0.00125 |
| Casein kinase II subunit alpha                                          | P68400 | CSNK2A1 | 45  | 6  | 28.00% | 0.00125 |
| Myotubularin-related protein 14                                         | Q8NCE2 | MTMR14  | 72  | 6  | 16.00% | 0.00125 |
| RNA-binding motif protein, X chromosome                                 | P38159 | RBMX    | 42  | 5  | 17.00% | 0.00125 |
| Bcl-2-associated transcription factor 1                                 | Q9NYF8 | BCLAF1  | 106 | 12 | 17.00% | 0.00123 |
| Eukaryotic translation initiation factor 3 subunit A                    | Q14152 | EIF3A   | 167 | 17 | 17.00% | 0.00123 |
| D-3-phosphoglycerate dehydrogenase                                      | O43175 | PHGDH   | 57  | 6  | 16.00% | 0.00122 |
| High mobility group protein B3                                          | O15347 | HMGB3   | 23  | 3  | 28.00% | 0.00122 |
| L-lactate dehydrogenase A chain                                         | P00338 | LDHA    | 37  | 4  | 16.00% | 0.00122 |
| Ribonuclease P protein subunit p30                                      | P78346 | RPP30   | 29  | 4  | 20.00% | 0.00121 |
| Zinc finger protein 593                                                 | O00488 | ZNF593  | 15  | 2  | 35.00% | 0.00121 |
| 5'-deoxynucleotidase HDDC2                                              | Q7Z4H3 | HDDC2   | 23  | 2  | 14.00% | 0.00119 |
| 60S ribosomal protein L15                                               | P61313 | RPL15   | 24  | 3  | 18.00% | 0.00119 |
| CD2 antigen cytoplasmic tail-binding protein 2                          | O95400 | CD2BP2  | 38  | 5  | 19.00% | 0.00119 |
| Lupus La protein                                                        | P05455 | SSB     | 47  | 6  | 21.00% | 0.00119 |

|                                                                  |        |         |     |    |        |         |
|------------------------------------------------------------------|--------|---------|-----|----|--------|---------|
| Prohibitin                                                       | P35232 | PHB     | 30  | 3  | 17.00% | 0.00119 |
| Replication protein A 70 kDa DNA-binding subunit                 | P27694 | RPA1    | 68  | 8  | 21.00% | 0.00119 |
| 60S ribosomal protein L28                                        | P46779 | RPL28   | 16  | 2  | 18.00% | 0.00118 |
| Interferon-induced, double-stranded RNA-activated protein kinase | P19525 | EIF2AK2 | 62  | 6  | 15.00% | 0.00118 |
| T-complex protein 1 subunit theta                                | P50990 | CCT8    | 60  | 8  | 17.00% | 0.00118 |
| Calmodulin-regulated spectrin-associated protein 3               | Q9P1Y5 | CAMSAP3 | 135 | 15 | 20.00% | 0.00117 |
| Heterogeneous nuclear ribonucleoprotein F                        | P52597 | HNRNPF  | 46  | 4  | 26.00% | 0.00117 |
| U6 snRNA-associated Sm-like protein LSM4                         | Q9Y4Z0 | LSM4    | 15  | 2  | 14.00% | 0.00117 |
| SAP domain-containing ribonucleoprotein                          | P82979 | SARNP   | 24  | 3  | 18.00% | 0.00116 |
| 39S ribosomal protein L48, mitochondrial                         | Q96GC5 | MRPL48  | 24  | 2  | 11.00% | 0.00115 |
| ATP-binding cassette sub-family F member 1                       | Q8NE71 | ABCF1   | 96  | 9  | 13.00% | 0.00115 |
| Eukaryotic translation initiation factor 3 subunit H             | O15372 | EIF3H   | 40  | 5  | 24.00% | 0.00115 |
| Eukaryotic translation initiation factor 3 subunit L             | Q9Y262 | EIF3L   | 67  | 7  | 19.00% | 0.00115 |
| ATP synthase subunit O, mitochondrial                            | P48047 | ATP5PO  | 23  | 3  | 17.00% | 0.00114 |
| GTP-binding nuclear protein Ran                                  | P62826 | RAN     | 24  | 3  | 16.00% | 0.00113 |
| Transcription elongation factor A protein-like 4                 | Q96E15 | TCEAL4  | 25  | 3  | 20.00% | 0.00113 |
| Guanine nucleotide-binding protein-like 3-like protein           | Q9NVN8 | GNL3L   | 66  | 7  | 19.00% | 0.00112 |
| Septin-2                                                         | Q15019 | SEPTIN2 | 41  | 5  | 23.00% | 0.00112 |
| Nucleolar complex protein 4 homolog                              | Q9BVI4 | NOC4L   | 58  | 5  | 16.00% | 0.0011  |
| Nucleophosmin                                                    | P06748 | NPM1    | 33  | 4  | 34.00% | 0.0011  |
| Survival motor neuron protein                                    | Q16637 | SMN1    | 32  | 4  | 23.00% | 0.0011  |
| DNA-3-methyladenine glycosylase                                  | P29372 | MPG     | 33  | 4  | 19.00% | 0.00109 |
| Eukaryotic translation initiation factor 3 subunit E             | P60228 | EIF3E   | 52  | 4  | 14.00% | 0.00109 |
| Peroxiredoxin-6                                                  | P30041 | PRDX6   | 25  | 2  | 15.00% | 0.00109 |
| Protein arginine N-methyltransferase 1                           | Q99873 | PRMT1   | 42  | 5  | 19.00% | 0.00109 |
| Calcyclin-binding protein                                        | Q9HB71 | CACYBP  | 26  | 2  | 13.00% | 0.00107 |
| Eukaryotic translation initiation factor 3 subunit C             | Q99613 | EIF3C   | 105 | 11 | 17.00% | 0.00107 |
| U4/U6.U5 small nuclear ribonucleoprotein 27 kDa protein          | Q8WVK2 | SNRNP27 | 19  | 2  | 23.00% | 0.00105 |
| Vimentin                                                         | P08670 | VIM     | 54  | 6  | 18.00% | 0.00104 |
| Caprin-1                                                         | Q14444 | CAPRIN1 | 78  | 8  | 16.00% | 0.00103 |
| Cleavage and polyadenylation specificity factor subunit 6        | Q16630 | CPSF6   | 59  | 5  | 14.00% | 0.00103 |
| Cleavage and polyadenylation specificity factor subunit 7        | Q8N684 | CPSF7   | 52  | 5  | 15.00% | 0.00103 |
| Eukaryotic translation initiation factor 2 subunit 1             | P05198 | EIF2S1  | 36  | 4  | 19.00% | 0.00103 |
| Low molecular weight phosphotyrosine protein phosphatase         | P24666 | ACP1    | 18  | 2  | 19.00% | 0.00103 |

|                                                            |        |         |     |    |        |          |
|------------------------------------------------------------|--------|---------|-----|----|--------|----------|
| 60S acidic ribosomal protein P0                            | P05388 | RPLP0   | 34  | 3  | 9.50%  | 0.00102  |
| Rho-associated protein kinase 1                            | Q13464 | ROCK1   | 158 | 16 | 18.00% | 0.00102  |
| Proteasome subunit beta type-1                             | P20618 | PSMB1   | 26  | 2  | 14.00% | 0.00101  |
| DNA replication licensing factor MCM3                      | P25205 | MCM3    | 91  | 8  | 16.00% | 0.001    |
| DAZ-associated protein 1                                   | Q96EP5 | DAZAP1  | 43  | 4  | 18.00% | 0.000997 |
| Proteasomal ubiquitin receptor ADRM1                       | Q16186 | ADRM1   | 42  | 2  | 7.90%  | 0.000997 |
| RNA-binding protein EWS                                    | Q01844 | EWSR1   | 68  | 5  | 13.00% | 0.000989 |
| 60S ribosomal protein L12                                  | P30050 | RPL12   | 18  | 2  | 15.00% | 0.000983 |
| 60S ribosomal protein L7                                   | P18124 | RPL7    | 29  | 2  | 10.00% | 0.000981 |
| Staphylococcal nuclease domain-containing protein 1        | Q7KZF4 | SND1    | 102 | 10 | 17.00% | 0.000981 |
| Heterogeneous nuclear ribonucleoprotein A/B                | Q99729 | HNRNPAB | 36  | 3  | 10.00% | 0.000978 |
| Gem-associated protein 6                                   | Q8WXD5 | GEMIN6  | 19  | 2  | 16.00% | 0.000972 |
| Serine/threonine-protein kinase PRP4 homolog               | Q13523 | PRPF4B  | 117 | 11 | 13.00% | 0.000967 |
| Polymerase delta-interacting protein 3                     | Q9BY77 | POLDIP3 | 46  | 5  | 19.00% | 0.000964 |
| 14-3-3 protein epsilon                                     | P62258 | YWHAE   | 29  | 3  | 11.00% | 0.000955 |
| Pre-mRNA-splicing factor CWC25 homolog                     | Q9NXE8 | CWC25   | 50  | 4  | 8.00%  | 0.000955 |
| RNA cytosine C(5)-methyltransferase NSUN2                  | Q08J23 | NSUN2   | 86  | 7  | 16.00% | 0.000952 |
| 60S ribosomal protein L4                                   | P36578 | RPL4    | 48  | 3  | 9.10%  | 0.00095  |
| Inosine-5'-monophosphate dehydrogenase 2                   | P12268 | IMPDH2  | 56  | 6  | 19.00% | 0.000947 |
| Heat shock protein 105 kDa                                 | Q92598 | HSPH1   | 97  | 8  | 14.00% | 0.000946 |
| Cytoskeleton-associated protein 4                          | Q07065 | CKAP4   | 66  | 7  | 18.00% | 0.000943 |
| Spindlin-3                                                 | Q5JUX0 | SPIN3   | 29  | 3  | 28.00% | 0.000943 |
| Heterogeneous nuclear ribonucleoprotein H3                 | P31942 | HNRNP3  | 37  | 4  | 18.00% | 0.000938 |
| Nuclear fragile X mental retardation-interacting protein 2 | Q7Z417 | NUFIP2  | 76  | 8  | 16.00% | 0.000934 |
| RNA-binding protein 8A                                     | Q9Y5S9 | RBM8A   | 20  | 2  | 26.00% | 0.000933 |
| Polypyrimidine tract-binding protein 1                     | P26599 | PTBP1   | 57  | 5  | 18.00% | 0.000917 |
| 60S ribosomal protein L7a                                  | P62424 | RPL7A   | 30  | 2  | 9.00%  | 0.000915 |
| Nucleolar protein 16                                       | Q9Y3C1 | NOP16   | 21  | 2  | 18.00% | 0.000912 |
| Tubulin beta-4B chain                                      | P68371 | TUBB4B  | 50  | 4  | 49.00% | 0.000912 |
| DNA replication licensing factor MCM7                      | P33993 | MCM7    | 81  | 8  | 19.00% | 0.000903 |
| General transcription factor II-I                          | P78347 | GTF2I   | 112 | 11 | 17.00% | 0.000894 |
| Transcription factor E2F7                                  | Q96AV8 | E2F7    | 100 | 10 | 18.00% | 0.000891 |
| Eukaryotic translation initiation factor 3 subunit D       | O15371 | EIF3D   | 64  | 6  | 16.00% | 0.000888 |
| Guanine nucleotide-binding protein-like 3                  | Q9BVP2 | GNL3    | 62  | 6  | 15.00% | 0.000887 |

|                                                                 |        |         |     |    |        |          |
|-----------------------------------------------------------------|--------|---------|-----|----|--------|----------|
| Lactoylglutathione lyase                                        | Q04760 | GLO1    | 21  | 2  | 16.00% | 0.000882 |
| RuvB-like 2                                                     | Q9Y230 | RUVBL2  | 51  | 5  | 14.00% | 0.000876 |
| RNA cytidine acetyltransferase                                  | Q9H0A0 | NAT10   | 116 | 8  | 13.00% | 0.000871 |
| Tropomyosin alpha-3 chain                                       | P06753 | TPM3    | 33  | 3  | 18.00% | 0.000854 |
| 60 kDa heat shock protein, mitochondrial                        | P10809 | HSPD1   | 61  | 4  | 12.00% | 0.00085  |
| 116 kDa U5 small nuclear ribonucleoprotein component            | Q15029 | EFTUD2  | 109 | 10 | 15.00% | 0.000835 |
| Uncharacterized protein NKAPD1                                  | Q6ZUT1 | NKAPD1  | 34  | 3  | 12.00% | 0.000834 |
| Protein LSM12 homolog                                           | Q3MHD2 | LSM12   | 22  | 2  | 14.00% | 0.000832 |
| MKI67 FHA domain-interacting nucleolar phosphoprotein           | Q9BYG3 | NIFK    | 34  | 2  | 4.80%  | 0.000831 |
| Myosin-9                                                        | P35579 | MYH9    | 227 | 17 | 15.00% | 0.000828 |
| Peptidyl-prolyl cis-trans isomerase-like 4                      | Q8WUA2 | PPIL4   | 57  | 4  | 9.60%  | 0.000825 |
| Angiomotin                                                      | Q4VCS5 | AMOT    | 118 | 10 | 15.00% | 0.000823 |
| Transgelin-2                                                    | P37802 | TAGLN2  | 22  | 2  | 11.00% | 0.000815 |
| Prohibitin-2                                                    | Q99623 | PHB2    | 33  | 3  | 13.00% | 0.000814 |
| Dynactin subunit 2                                              | Q13561 | DCTN2   | 44  | 4  | 16.00% | 0.000809 |
| RNA-splicing ligase RtcB homolog                                | Q9Y310 | RTCB    | 55  | 4  | 10.00% | 0.000803 |
| 60S ribosomal protein L13a                                      | P40429 | RPL13A  | 24  | 2  | 11.00% | 0.000799 |
| Probable ATP-dependent RNA helicase DDX23                       | Q9BUQ8 | DDX23   | 96  | 7  | 11.00% | 0.000792 |
| Probable ATP-dependent RNA helicase DDX20                       | Q9UHI6 | DDX20   | 92  | 6  | 14.00% | 0.000788 |
| Probable ATP-dependent RNA helicase DDX41                       | Q9UJV9 | DDX41   | 70  | 6  | 13.00% | 0.000783 |
| 26S proteasome non-ATPase regulatory subunit 11                 | O00231 | PSMD11  | 47  | 4  | 12.00% | 0.000769 |
| Pyruvate kinase PKM                                             | P14618 | PKM     | 58  | 4  | 13.00% | 0.000764 |
| Charged multivesicular body protein 2b                          | Q9UQN3 | CHMP2B  | 24  | 2  | 9.40%  | 0.000762 |
| Eukaryotic translation initiation factor 5                      | P55010 | EIF5    | 49  | 4  | 11.00% | 0.000753 |
| Peptidyl-prolyl cis-trans isomerase B                           | P23284 | PPIB    | 24  | 2  | 10.00% | 0.000751 |
| Alpha-enolase                                                   | P06733 | ENO1    | 47  | 4  | 18.00% | 0.000748 |
| Serine/threonine-protein phosphatase PP1-beta catalytic subunit | P62140 | PPP1CB  | 37  | 3  | 8.90%  | 0.000744 |
| Mitotic checkpoint protein BUB3                                 | O43684 | BUB3    | 37  | 3  | 14.00% | 0.000742 |
| Histone H1.3                                                    | P16402 | H1-3    | 22  | 2  | 38.00% | 0.000734 |
| Pre-mRNA-processing-splicing factor 8                           | Q6P2Q9 | PRPF8   | 274 | 19 | 13.00% | 0.00073  |
| L-lactate dehydrogenase B chain                                 | P07195 | LDHB    | 37  | 3  | 12.00% | 0.000729 |
| Tubulin beta-2A chain                                           | Q13885 | TUBB2A  | 50  | 3  | 44.00% | 0.000729 |
| Double-stranded RNA-specific adenosine deaminase                | P55265 | ADAR    | 136 | 11 | 13.00% | 0.000728 |
| G patch domain-containing protein 4                             | Q5T310 | GPATCH4 | 50  | 3  | 12.00% | 0.000728 |



|                                                                          |        |         |     |    |        |          |
|--------------------------------------------------------------------------|--------|---------|-----|----|--------|----------|
| RNA-binding protein 14                                                   | Q96PK6 | RBM14   | 69  | 6  | 16.00% | 0.000728 |
| ATP-dependent DNA/RNA helicase DHX36                                     | Q9H2U1 | DHX36   | 115 | 8  | 10.00% | 0.000724 |
| Corepressor interacting with RBPJ 1                                      | Q86X95 | CIR1    | 52  | 3  | 8.00%  | 0.000721 |
| Pre-mRNA-splicing factor SPF27                                           | O75934 | BCAS2   | 26  | 2  | 19.00% | 0.000721 |
| Cytoskeleton-associated protein 5                                        | Q14008 | CKAP5   | 226 | 16 | 13.00% | 0.000719 |
| Protein FAM76B                                                           | Q5HYJ3 | FAM76B  | 39  | 2  | 6.50%  | 0.000718 |
| 26S proteasome non-ATPase regulatory subunit 2                           | Q13200 | PSMD2   | 100 | 7  | 12.00% | 0.000715 |
| 26S proteasome non-ATPase regulatory subunit 12                          | O00232 | PSMD12  | 53  | 4  | 13.00% | 0.000712 |
| DNA-dependent protein kinase catalytic subunit                           | P78527 | PRKDC   | 469 | 30 | 10.00% | 0.000708 |
| Probable ATP-dependent RNA helicase DDX46                                | Q7L014 | DDX46   | 117 | 8  | 11.00% | 0.000708 |
| Filamin-A                                                                | P21333 | FLNA    | 281 | 20 | 14.00% | 0.000705 |
| YTH domain-containing family protein 2                                   | Q9Y5A9 | YTHDF2  | 62  | 5  | 17.00% | 0.000701 |
| SLAIN motif-containing protein 2                                         | Q9P270 | SLAIN2  | 63  | 5  | 13.00% | 0.000698 |
| Casein kinase II subunit alpha'                                          | P19784 | CSNK2A2 | 41  | 3  | 13.00% | 0.000695 |
| C-1-tetrahydrofolate synthase, cytoplasmic                               | P11586 | MTHFD1  | 102 | 8  | 11.00% | 0.000694 |
| Pre-mRNA-processing factor 6                                             | O94906 | PRPF6   | 107 | 8  | 10.00% | 0.00069  |
| Tryptophan--tRNA ligase, cytoplasmic                                     | P23381 | WARS1   | 53  | 4  | 15.00% | 0.000689 |
| Eukaryotic translation initiation factor 3 subunit F                     | O00303 | EIF3F   | 38  | 3  | 13.00% | 0.000682 |
| Ataxin-2-like protein                                                    | Q8WWM7 | ATXN2L  | 113 | 8  | 14.00% | 0.000679 |
| ATP-dependent RNA helicase DDX19A                                        | Q9NUU7 | DDX19A  | 54  | 4  | 12.00% | 0.000679 |
| Fatty acid synthase                                                      | P49327 | FASN    | 273 | 18 | 13.00% | 0.000679 |
| Small nuclear ribonucleoprotein-associated proteins B and B'             | P14678 | SNRPB   | 25  | 2  | 12.00% | 0.000676 |
| Mitogen-activated protein kinase 6                                       | Q16659 | MAPK6   | 83  | 4  | 9.70%  | 0.000675 |
| Dolichyl-diphosphooligosaccharide--protein glycosyltransferase subunit 1 | P04843 | RPN1    | 69  | 5  | 12.00% | 0.000668 |
| PHD finger protein 6                                                     | Q8IWS0 | PHF6    | 41  | 3  | 16.00% | 0.000667 |
| ATP-citrate synthase                                                     | P53396 | ACLY    | 121 | 8  | 13.00% | 0.000663 |
| Protein FAM133B                                                          | Q5BKY9 | FAM133B | 28  | 2  | 7.70%  | 0.000657 |
| Cyclin-dependent kinase 9                                                | P50750 | CDK9    | 43  | 3  | 9.90%  | 0.000654 |
| Proteasome subunit alpha type-7                                          | O14818 | PSMA7   | 28  | 2  | 10.00% | 0.000654 |
| tRNA (adenine(58)-N(1))-methyltransferase non-catalytic subunit TRM6     | Q9UJA5 | TRMT6   | 56  | 4  | 13.00% | 0.000653 |
| Protein DEK                                                              | P35659 | DEK     | 43  | 3  | 9.30%  | 0.000649 |
| HIV Tat-specific factor 1                                                | O43719 | HTATSF1 | 86  | 5  | 14.00% | 0.000645 |

|                                                                      |        |          |     |    |        |          |
|----------------------------------------------------------------------|--------|----------|-----|----|--------|----------|
| Deoxyuridine 5'-triphosphate nucleotidohydrolase, mitochondrial      | P33316 | DUT      | 27  | 2  | 12.00% | 0.000644 |
| Hsp90 co-chaperone Cdc37                                             | Q16543 | CDC37    | 44  | 2  | 11.00% | 0.000644 |
| RNA-binding protein PNO1                                             | Q9NRX1 | PNO1     | 28  | 2  | 10.00% | 0.000644 |
| Cell growth-regulating nucleolar protein                             | Q9NX58 | LYAR     | 44  | 3  | 12.00% | 0.000642 |
| DnaJ homolog subfamily C member 8                                    | O75937 | DNAJC8   | 30  | 2  | 13.00% | 0.000641 |
| Proteasome subunit alpha type-3                                      | P25788 | PSMA3    | 28  | 2  | 8.20%  | 0.000636 |
| 26S proteasome non-ATPase regulatory subunit 6                       | Q15008 | PSMD6    | 46  | 3  | 11.00% | 0.000626 |
| DnaJ homolog subfamily C member 9                                    | Q8WXX5 | DNAJC9   | 30  | 2  | 8.80%  | 0.000624 |
| Nucleolar RNA helicase 2                                             | Q9NR30 | DDX21    | 87  | 6  | 10.00% | 0.000622 |
| DnaJ homolog subfamily A member 1                                    | P31689 | DNAJA1   | 45  | 3  | 15.00% | 0.000613 |
| Importin subunit alpha-1                                             | P52292 | KPNA2    | 58  | 4  | 13.00% | 0.000613 |
| Endoplasmic                                                          | P14625 | HSP90B1  | 92  | 6  | 14.00% | 0.000606 |
| 60S ribosomal protein L3                                             | P39023 | RPL3     | 46  | 3  | 8.70%  | 0.000604 |
| Replication protein A 32 kDa subunit                                 | P15927 | RPA2     | 29  | 2  | 21.00% | 0.000601 |
| Eukaryotic initiation factor 4A-I                                    | P60842 | EIF4A1   | 46  | 3  | 9.90%  | 0.0006   |
| Eukaryotic translation initiation factor 3 subunit B                 | P55884 | EIF3B    | 92  | 5  | 8.60%  | 0.000598 |
| Arginine and glutamate-rich protein 1                                | Q9NWB6 | ARGLU1   | 33  | 2  | 6.20%  | 0.000594 |
| TGF-beta-activated kinase 1 and MAP3K7-binding protein 2             | Q9NYJ8 | TAB2     | 76  | 4  | 9.40%  | 0.000585 |
| Insulin receptor substrate 4                                         | O14654 | IRS4     | 134 | 9  | 15.00% | 0.000581 |
| Poly(U)-binding-splicing factor PUF60                                | Q9UHX1 | PUF60    | 60  | 4  | 14.00% | 0.000581 |
| Probable 18S rRNA (guanine-N(7))-methyltransferase                   | O43709 | BUD23    | 32  | 2  | 14.00% | 0.000577 |
| Complement component 1 Q subcomponent-binding protein, mitochondrial | Q07021 | C1QBP    | 31  | 2  | 9.90%  | 0.000575 |
| Histone-binding protein RBBP7                                        | Q16576 | RBBP7    | 48  | 2  | 9.60%  | 0.000573 |
| U5 small nuclear ribonucleoprotein 200 kDa helicase                  | O75643 | SNRNP200 | 245 | 15 | 9.90%  | 0.00057  |
| F-actin-capping protein subunit alpha-1                              | P52907 | CAPZA1   | 33  | 2  | 12.00% | 0.000567 |
| Far upstream element-binding protein 3                               | Q96I24 | FUBP3    | 62  | 4  | 13.00% | 0.000567 |
| Septin-11                                                            | Q9NVA2 | SEPTIN11 | 49  | 3  | 7.90%  | 0.000567 |
| 60S ribosomal protein L6                                             | Q02878 | RPL6     | 33  | 2  | 10.00% | 0.000563 |
| Tyrosine-protein kinase JAK1                                         | P23458 | JAK1     | 133 | 8  | 11.00% | 0.000562 |
| Serine/threonine-protein phosphatase PGAM5, mitochondrial            | Q96HS1 | PGAM5    | 32  | 2  | 7.60%  | 0.000561 |
| tRNA (adenine(58)-N(1))-methyltransferase catalytic subunit TRMT61A  | Q96FX7 | TRMT61A  | 31  | 2  | 16.00% | 0.000561 |
| Bystin                                                               | Q13895 | BYSL     | 50  | 2  | 7.60%  | 0.000557 |
| Elongation factor 1-gamma                                            | P26641 | EEF1G    | 50  | 3  | 9.20%  | 0.000557 |

|                                                                                    |        |          |     |    |        |          |
|------------------------------------------------------------------------------------|--------|----------|-----|----|--------|----------|
| Leucine-rich repeat-containing protein 47                                          | Q8N1G4 | LRRC47   | 63  | 3  | 6.50%  | 0.000557 |
| U1 small nuclear ribonucleoprotein 70 kDa                                          | P08621 | SNRNP70  | 52  | 3  | 16.00% | 0.000557 |
| DNA replication licensing factor MCM5                                              | P33992 | MCM5     | 82  | 4  | 9.50%  | 0.000553 |
| Zinc finger protein 346                                                            | Q9UL40 | ZNF346   | 33  | 2  | 9.50%  | 0.000552 |
| ATP-dependent RNA helicase DDX1                                                    | Q92499 | DDX1     | 82  | 5  | 11.00% | 0.000548 |
| Pre-mRNA 3'-end-processing factor FIP1                                             | Q6UN15 | FIP1L1   | 67  | 4  | 11.00% | 0.000546 |
| ATP synthase subunit gamma, mitochondrial                                          | P36542 | ATP5F1C  | 33  | 2  | 8.40%  | 0.000545 |
| Zinc finger CCCH-type antiviral protein 1                                          | Q7Z2W4 | ZC3HAV1  | 101 | 5  | 9.80%  | 0.00054  |
| Gem-associated protein 5                                                           | Q8TEQ6 | GEMIN5   | 169 | 9  | 10.00% | 0.000538 |
| Probable ATP-dependent RNA helicase DDX47                                          | Q9H0S4 | DDX47    | 51  | 2  | 9.20%  | 0.000535 |
| RuvB-like 1                                                                        | Q9Y265 | RUVBL1   | 50  | 2  | 5.70%  | 0.000534 |
| Exportin-1                                                                         | O14980 | XPO1     | 123 | 6  | 10.00% | 0.00053  |
| Fragile X mental retardation syndrome-related protein 1                            | P51114 | FXR1     | 70  | 4  | 14.00% | 0.000523 |
| Glyoxalase domain-containing protein 4                                             | Q9HC38 | GLOD4    | 35  | 2  | 7.30%  | 0.000518 |
| Probable dimethyladenosine transferase                                             | Q9UNQ2 | DIMT1    | 35  | 2  | 11.00% | 0.000518 |
| Mitochondrial 2-oxoglutarate/malate carrier protein                                | Q02978 | SLC25A11 | 34  | 2  | 11.00% | 0.000517 |
| Calumenin                                                                          | O43852 | CALU     | 37  | 2  | 11.00% | 0.000515 |
| Transcription initiation factor IIB                                                | Q00403 | GTF2B    | 35  | 2  | 9.20%  | 0.000514 |
| Valine--tRNA ligase                                                                | P26640 | VAR51    | 140 | 8  | 11.00% | 0.000514 |
| Receptor of activated protein C kinase 1                                           | P63244 | RACK1    | 35  | 2  | 8.20%  | 0.000512 |
| 26S proteasome non-ATPase regulatory subunit 1                                     | Q99460 | PSMD1    | 106 | 6  | 12.00% | 0.000511 |
| Ankyrin repeat and KH domain-containing protein 1                                  | Q8IWZ3 | ANKHD1   | 269 | 15 | 9.60%  | 0.000511 |
| Polyadenylate-binding protein 1                                                    | P11940 | PABPC1   | 71  | 4  | 10.00% | 0.00051  |
| Ribose-phosphate pyrophosphokinase 1                                               | P60891 | PRPS1    | 35  | 2  | 9.40%  | 0.00051  |
| Histone deacetylase 1                                                              | Q13547 | HDAC1    | 55  | 3  | 8.90%  | 0.000505 |
| Probable ATP-dependent RNA helicase DDX6                                           | P26196 | DDX6     | 54  | 3  | 11.00% | 0.000504 |
| RNA-binding motif protein, X-linked 2                                              | Q9Y388 | RBMX2    | 37  | 2  | 7.10%  | 0.000504 |
| 26S proteasome non-ATPase regulatory subunit 7                                     | P51665 | PSMD7    | 37  | 2  | 7.40%  | 0.000501 |
| Putative bifunctional UDP-N-acetylglucosamine transferase and deubiquitinase ALG13 | Q9NP73 | ALG13    | 126 | 6  | 7.80%  | 0.0005   |
| BTB/POZ domain-containing protein KCTD12                                           | Q96CX2 | KCTD12   | 36  | 2  | 7.40%  | 0.000499 |
| RNA-binding protein Musashi homolog 2                                              | Q96DH6 | MSI2     | 35  | 2  | 13.00% | 0.000495 |
| Arginine--tRNA ligase, cytoplasmic                                                 | P54136 | RARS1    | 75  | 4  | 8.90%  | 0.000492 |
| Protein PRRC2A                                                                     | P48634 | PRRC2A   | 229 | 11 | 11.00% | 0.000489 |

|                                                                                   |        |         |     |    |        |          |
|-----------------------------------------------------------------------------------|--------|---------|-----|----|--------|----------|
| Eukaryotic translation initiation factor 2 subunit 2                              | P20042 | EIF2S2  | 38  | 2  | 7.80%  | 0.000487 |
| Monocarboxylate transporter 1                                                     | P53985 | SLC16A1 | 54  | 2  | 8.20%  | 0.000487 |
| Trinucleotide repeat-containing gene 6B protein                                   | Q9UPQ9 | TNRC6B  | 194 | 11 | 11.00% | 0.000487 |
| Pre-mRNA-processing factor 19                                                     | Q9UMS4 | PRPF19  | 55  | 3  | 9.90%  | 0.000483 |
| 6-phosphofructo-2-kinase/fructose-2,6-bisphosphatase 2                            | O60825 | PFKFB2  | 58  | 3  | 11.00% | 0.000482 |
| Nucleolar protein 14                                                              | P78316 | NOP14   | 98  | 4  | 6.00%  | 0.000473 |
| DNA replication licensing factor MCM4                                             | P33991 | MCM4    | 97  | 4  | 8.90%  | 0.00047  |
| DNA-directed RNA polymerases I and III subunit RPAC1                              | O15160 | POLR1C  | 39  | 2  | 9.80%  | 0.000469 |
| Glutamine--fructose-6-phosphate aminotransferase [isomerizing] 1                  | Q06210 | GFPT1   | 79  | 4  | 8.40%  | 0.000464 |
| THO complex subunit 3                                                             | Q96J01 | THOC3   | 39  | 2  | 6.00%  | 0.000462 |
| Homer protein homolog 2                                                           | Q9NSB8 | HOMER2  | 41  | 2  | 9.00%  | 0.000458 |
| Poly(rC)-binding protein 1                                                        | Q15365 | PCBP1   | 37  | 2  | 12.00% | 0.000456 |
| U5 small nuclear ribonucleoprotein 40 kDa protein                                 | Q96DI7 | SNRNP40 | 39  | 2  | 16.00% | 0.000455 |
| CWF19-like protein 2                                                              | Q2TBE0 | CWF19L2 | 104 | 5  | 6.70%  | 0.000454 |
| Splicing factor 3B subunit 2                                                      | Q13435 | SF3B2   | 100 | 4  | 9.60%  | 0.000453 |
| Serine/arginine repetitive matrix protein 1                                       | Q8IYB3 | SRRM1   | 102 | 3  | 7.00%  | 0.000449 |
| Vigilin                                                                           | Q00341 | HDLBP   | 141 | 7  | 9.60%  | 0.000448 |
| Ribonuclease P protein subunit p40                                                | O75818 | RPP40   | 42  | 2  | 11.00% | 0.000447 |
| Src substrate cortactin                                                           | Q14247 | CTTN    | 62  | 3  | 11.00% | 0.000443 |
| Serine/arginine repetitive matrix protein 2                                       | Q9UQ35 | SRRM2   | 300 | 14 | 8.40%  | 0.000442 |
| Treacle protein                                                                   | Q13428 | TCOF1   | 152 | 7  | 6.40%  | 0.000436 |
| Nucleosome assembly protein 1-like 4                                              | Q99733 | NAP1L4  | 43  | 2  | 9.90%  | 0.000433 |
| U4/U6.U5 tri-snRNP-associated protein 2                                           | Q53GS9 | USP39   | 65  | 3  | 7.30%  | 0.000431 |
| 26S proteasome non-ATPase regulatory subunit 4                                    | P55036 | PSMD4   | 41  | 2  | 10.00% | 0.00043  |
| Pre-mRNA-processing factor 40 homolog A                                           | O75400 | PRPF40A | 109 | 4  | 6.50%  | 0.000424 |
| Protein LSM14 homolog B                                                           | Q9BX40 | LSM14B  | 42  | 2  | 7.80%  | 0.000421 |
| Melanoma-associated antigen D1                                                    | Q9Y5V3 | MAGED1  | 86  | 4  | 13.00% | 0.000417 |
| Nucleosome assembly protein 1-like 1                                              | P55209 | NAP1L1  | 45  | 2  | 9.00%  | 0.000415 |
| Putative RNA-binding protein Luc7-like 2                                          | Q9Y383 | LUC7L2  | 47  | 2  | 6.60%  | 0.000414 |
| Heterogeneous nuclear ribonucleoprotein L                                         | P14866 | HNRNPL  | 64  | 3  | 12.00% | 0.000413 |
| Serine/threonine-protein phosphatase 2A 65 kDa regulatory subunit A alpha isoform | P30153 | PPP2R1A | 65  | 3  | 5.40%  | 0.000413 |
| Protein enabled homolog                                                           | Q8N8S7 | ENAH    | 67  | 2  | 7.30%  | 0.000412 |
| Calnexin                                                                          | P27824 | CANX    | 68  | 3  | 6.90%  | 0.000411 |

|                                                      |        |         |     |    |        |          |
|------------------------------------------------------|--------|---------|-----|----|--------|----------|
| Myosin-10                                            | P35580 | MYH10   | 229 | 10 | 9.00%  | 0.000411 |
| S-adenosylmethionine synthase isoform type-2         | P31153 | MAT2A   | 44  | 2  | 6.60%  | 0.000411 |
| TATA-binding protein-associated factor 2N            | Q92804 | TAF15   | 62  | 3  | 16.00% | 0.000411 |
| Serine/threonine-protein kinase VRK1                 | Q99986 | VRK1    | 45  | 2  | 11.00% | 0.00041  |
| Transcriptional repressor p66-beta                   | Q8WXI9 | GATAD2B | 65  | 2  | 4.00%  | 0.00041  |
| Myelin expression factor 2                           | Q9P2K5 | MYEF2   | 64  | 3  | 8.70%  | 0.000406 |
| Transcription initiation factor TFIID subunit 2      | Q6P1X5 | TAF2    | 137 | 5  | 6.80%  | 0.000406 |
| Cell division cycle 5-like protein                   | Q99459 | CDC5L   | 92  | 4  | 7.00%  | 0.000405 |
| Melanoma-associated antigen D2                       | Q9UNF1 | MAGED2  | 65  | 2  | 12.00% | 0.000402 |
| Mitogen-activated protein kinase kinase kinase 7     | O43318 | MAP3K7  | 67  | 3  | 8.70%  | 0.000402 |
| Eukaryotic translation initiation factor 5B          | O60841 | EIF5B   | 139 | 6  | 9.20%  | 0.000399 |
| DnaJ homolog subfamily A member 2                    | O60884 | DNAJA2  | 46  | 2  | 10.00% | 0.000394 |
| RNA-binding protein NOB1                             | Q9ULX3 | NOB1    | 47  | 2  | 6.10%  | 0.000394 |
| Protein regulator of cytokinesis 1                   | O43663 | PRC1    | 72  | 3  | 6.50%  | 0.000393 |
| TAR DNA-binding protein 43                           | Q13148 | TARDBP  | 45  | 2  | 7.20%  | 0.000392 |
| ATP-binding cassette sub-family F member 2           | Q9UG63 | ABCF2   | 71  | 2  | 4.00%  | 0.000391 |
| Casein kinase I isoform epsilon                      | P49674 | CSNK1E  | 47  | 2  | 6.50%  | 0.00039  |
| Importin-9                                           | Q96P70 | IPO9    | 116 | 4  | 7.70%  | 0.00039  |
| Transforming acidic coiled-coil-containing protein 3 | Q9Y6A5 | TACC3   | 90  | 3  | 8.60%  | 0.000387 |
| Heat shock 70 kDa protein 4                          | P34932 | HSPA4   | 94  | 4  | 6.20%  | 0.000386 |
| AP-1 complex subunit mu-1                            | Q9BXS5 | AP1M1   | 49  | 2  | 7.10%  | 0.000384 |
| Nucleolar GTP-binding protein 1                      | Q9BZE4 | GTPBP4  | 74  | 3  | 6.90%  | 0.000384 |
| Dynactin subunit 1                                   | Q14203 | DCTN1   | 142 | 6  | 9.20%  | 0.000381 |
| Far upstream element-binding protein 1               | Q96AE4 | FUBP1   | 68  | 3  | 9.50%  | 0.000378 |
| Bifunctional glutamate/proline--tRNA ligase          | P07814 | EPRS1   | 171 | 7  | 8.30%  | 0.000376 |
| CLIP-associating protein 2                           | O75122 | CLASP2  | 141 | 5  | 6.00%  | 0.000376 |
| GRB10-interacting GYF protein 2                      | Q6Y7W6 | GIGYF2  | 150 | 5  | 6.10%  | 0.000375 |
| Arginine/serine-rich coiled-coil protein 2           | Q7L4I2 | RSRC2   | 51  | 2  | 7.80%  | 0.000374 |
| N-acylneuraminate cytidyltransferase                 | Q8NFW8 | CMAS    | 48  | 2  | 8.50%  | 0.000374 |
| Importin-5                                           | O00410 | IPO5    | 124 | 4  | 7.60%  | 0.00037  |
| Protein disulfide-isomerase A6                       | Q15084 | PDIA6   | 48  | 2  | 6.60%  | 0.000369 |
| Ubiquitin carboxyl-terminal hydrolase 7              | Q93009 | USP7    | 128 | 5  | 8.40%  | 0.000368 |
| Tubulin beta-6 chain                                 | Q9BUF5 | TUBB6   | 50  | 2  | 25.00% | 0.000364 |

|                                                                                   |        |         |     |   |        |          |
|-----------------------------------------------------------------------------------|--------|---------|-----|---|--------|----------|
| Serine/threonine-protein phosphatase 2A 55 kDa regulatory subunit B alpha isoform | P63151 | PPP2R2A | 52  | 2 | 6.00%  | 0.000363 |
| Stress-70 protein, mitochondrial                                                  | P38646 | HSPA9   | 74  | 3 | 5.40%  | 0.000358 |
| AP-3 complex subunit delta-1                                                      | O14617 | AP3D1   | 130 | 4 | 5.10%  | 0.000352 |
| Cell cycle and apoptosis regulator protein 2                                      | Q8N163 | CCAR2   | 103 | 4 | 5.40%  | 0.000352 |
| Microtubule-associated protein 4                                                  | P27816 | MAP4    | 121 | 5 | 6.90%  | 0.000352 |
| Lamina-associated polypeptide 2, isoform alpha                                    | P42166 | TMPO    | 75  | 3 | 7.20%  | 0.000351 |
| Rabankyrin-5                                                                      | Q9P2R3 | ANKFY1  | 128 | 5 | 7.80%  | 0.000347 |
| Kinesin-like protein KIF2A                                                        | O00139 | KIF2A   | 80  | 3 | 5.80%  | 0.000345 |
| FACT complex subunit SSRP1                                                        | Q08945 | SSRP1   | 81  | 2 | 4.90%  | 0.000343 |
| Adenylyl cyclase-associated protein 1                                             | Q01518 | CAP1    | 52  | 2 | 8.60%  | 0.000342 |
| Ataxin-10                                                                         | Q9UBB4 | ATXN10  | 53  | 2 | 5.30%  | 0.000342 |
| Dual specificity protein kinase CLK4                                              | Q9HAZ1 | CLK4    | 57  | 2 | 6.90%  | 0.000337 |
| General vesicular transport factor p115                                           | O60763 | USO1    | 108 | 4 | 6.20%  | 0.000337 |
| Kinesin-1 heavy chain                                                             | P33176 | KIF5B   | 110 | 4 | 5.30%  | 0.000337 |
| Ras GTPase-activating protein-binding protein 2                                   | Q9UN86 | G3BP2   | 54  | 2 | 12.00% | 0.000337 |
| N-alpha-acetyltransferase 25, NatB auxiliary subunit                              | Q14CX7 | NAA25   | 112 | 4 | 3.80%  | 0.000334 |
| Ribosomal L1 domain-containing protein 1                                          | O76021 | RSL1D1  | 55  | 2 | 9.20%  | 0.000331 |
| CAD protein                                                                       | P27708 | CAD     | 243 | 8 | 5.90%  | 0.000328 |
| H/ACA ribonucleoprotein complex subunit DKC1                                      | O60832 | DKC1    | 58  | 2 | 5.60%  | 0.000316 |
| Structural maintenance of chromosomes protein 4                                   | Q9NTJ3 | SMC4    | 147 | 5 | 5.90%  | 0.000315 |
| Transducin-like enhancer protein 3                                                | Q04726 | TLE3    | 83  | 3 | 4.80%  | 0.000315 |
| Apoptosis inhibitor 5                                                             | Q9BZZ5 | API5    | 59  | 2 | 4.20%  | 0.00031  |
| Decreased expression in renal and prostate cancer protein                         | P0CG12 | DERPC   | 51  | 2 | 6.50%  | 0.00031  |
| Protein PRRC2C                                                                    | Q9Y520 | PRRC2C  | 317 | 9 | 4.60%  | 0.000308 |
| Glucosidase 2 subunit beta                                                        | P14314 | PRKCSH  | 59  | 2 | 4.00%  | 0.000307 |
| Tyrosine--tRNA ligase, cytoplasmic                                                | P54577 | YARS1   | 59  | 2 | 4.20%  | 0.000307 |
| Ubiquitin-like modifier-activating enzyme 1                                       | P22314 | UBA1    | 118 | 4 | 7.10%  | 0.000307 |
| Zinc finger RNA-binding protein                                                   | Q96KR1 | ZFR     | 117 | 4 | 6.50%  | 0.000302 |
| Stress-induced-phosphoprotein 1                                                   | P31948 | STIP1   | 63  | 2 | 4.20%  | 0.000299 |
| OTU domain-containing protein 4                                                   | Q01804 | OTUD4   | 124 | 3 | 5.00%  | 0.000291 |
| Cytosolic purine 5'-nucleotidase                                                  | P49902 | NT5C2   | 65  | 2 | 7.00%  | 0.000289 |
| Double-stranded RNA-binding protein Staufen homolog 2                             | Q9NUL3 | STAU2   | 63  | 2 | 4.40%  | 0.000285 |
| Insulin-like growth factor 2 mRNA-binding protein 3                               | O00425 | IGF2BP3 | 64  | 2 | 9.20%  | 0.00028  |

|                                                                          |        |           |     |   |        |          |
|--------------------------------------------------------------------------|--------|-----------|-----|---|--------|----------|
| Importin subunit beta-1                                                  | Q14974 | KPNB1     | 97  | 3 | 3.80%  | 0.000278 |
| Eukaryotic translation initiation factor 2A                              | Q9BY44 | EIF2A     | 65  | 2 | 6.00%  | 0.000277 |
| Pre-mRNA-splicing factor SLU7                                            | O95391 | SLU7      | 68  | 2 | 7.00%  | 0.000277 |
| Septin-9                                                                 | Q9UHD8 | SEPTIN9   | 65  | 2 | 5.30%  | 0.000277 |
| Lysine--tRNA ligase                                                      | Q15046 | KARS1     | 68  | 2 | 6.50%  | 0.000272 |
| DNA replication licensing factor MCM2                                    | P49736 | MCM2      | 102 | 3 | 4.00%  | 0.000269 |
| Splicing factor 3B subunit 3                                             | Q15393 | SF3B3     | 136 | 4 | 4.70%  | 0.000267 |
| Coatmer subunit alpha                                                    | P53621 | COPA      | 138 | 4 | 5.20%  | 0.000265 |
| Structural maintenance of chromosomes protein 1A                         | Q14683 | SMC1A     | 143 | 4 | 4.60%  | 0.000263 |
| Dolichyl-diphosphooligosaccharide--protein glycosyltransferase subunit 2 | P04844 | RPN2      | 69  | 2 | 9.40%  | 0.000257 |
| Cytoplasmic dynein 1 intermediate chain 2                                | Q13409 | DYNC1I2   | 71  | 2 | 10.00% | 0.000254 |
| Eukaryotic translation initiation factor 4E transporter                  | Q9NRA8 | EIF4ENIF1 | 108 | 3 | 6.60%  | 0.000247 |
| Metastasis-associated protein MTA2                                       | O94776 | MTA2      | 75  | 2 | 3.90%  | 0.000243 |
| Signal recognition particle subunit SRP72                                | O76094 | SRP72     | 75  | 2 | 4.50%  | 0.000242 |
| Helicase-like transcription factor                                       | Q14527 | HLTF      | 114 | 3 | 4.00%  | 0.000241 |
| Calcium-binding mitochondrial carrier protein Aralar2                    | Q9UJS0 | SLC25A13  | 74  | 2 | 6.20%  | 0.00024  |
| Sodium/potassium-transporting ATPase subunit alpha-1                     | P05023 | ATP1A1    | 113 | 3 | 3.40%  | 0.000238 |
| 7SK snRNA methylphosphate capping enzyme                                 | Q7L2J0 | MEPCE     | 74  | 2 | 4.10%  | 0.000236 |
| TGF-beta-activated kinase 1 and MAP3K7-binding protein 3                 | Q8N5C8 | TAB3      | 79  | 2 | 4.90%  | 0.000228 |
| Ribosomal RNA processing protein 1 homolog B                             | Q14684 | RRP1B     | 84  | 2 | 3.80%  | 0.000214 |
| Nuclear autoantigenic sperm protein                                      | P49321 | NASP      | 85  | 2 | 6.00%  | 0.000206 |
| ATP-dependent RNA helicase DHX30                                         | Q7L2E3 | DHX30     | 134 | 3 | 3.00%  | 0.000204 |
| Eukaryotic translation initiation factor 4 gamma 1                       | Q04637 | EIF4G1    | 175 | 4 | 3.80%  | 0.000203 |
| Pre-rRNA-processing protein TSR1 homolog                                 | Q2NL82 | TSR1      | 92  | 2 | 3.90%  | 0.000202 |
| Leucine-rich repeat flightless-interacting protein 1                     | Q32MZ4 | LRRFIP1   | 89  | 2 | 3.80%  | 0.000201 |
| Cullin-associated NEDD8-dissociated protein 1                            | Q86VP6 | CAND1     | 136 | 3 | 3.50%  | 0.000198 |
| N-alpha-acetyltransferase 15, NatA auxiliary subunit                     | Q9BXJ9 | NAA15     | 101 | 2 | 4.00%  | 0.000187 |
| Splicing factor 3B subunit 1                                             | O75533 | SF3B1     | 146 | 3 | 4.10%  | 0.000187 |
| Methionine--tRNA ligase, cytoplasmic                                     | P56192 | MARS1     | 101 | 2 | 4.20%  | 0.00018  |
| Eukaryotic translation initiation factor 4 gamma 2                       | P78344 | EIF4G2    | 102 | 2 | 2.80%  | 0.000179 |
| Neutral alpha-glucosidase AB                                             | Q14697 | GANAB     | 107 | 2 | 3.40%  | 0.000172 |
| WD repeat-containing protein 36                                          | Q8NI36 | WDR36     | 105 | 2 | 2.50%  | 0.000171 |
| Exportin-2                                                               | P55060 | CSE1L     | 110 | 2 | 1.80%  | 0.000167 |

|                                                       |        |         |     |   |       |          |
|-------------------------------------------------------|--------|---------|-----|---|-------|----------|
| RNA-binding protein 15                                | Q96T37 | RBM15   | 107 | 2 | 3.60% | 0.000166 |
| Echinoderm microtubule-associated protein-like 4      | Q9HC35 | EML4    | 109 | 2 | 4.40% | 0.000165 |
| Ubiquitin carboxyl-terminal hydrolase 15              | Q9Y4E8 | USP15   | 112 | 2 | 2.90% | 0.000165 |
| RNA-binding protein 26                                | Q5T8P6 | RBM26   | 114 | 2 | 2.90% | 0.000161 |
| Trifunctional purine biosynthetic protein adenosine-3 | P22102 | GART    | 108 | 2 | 3.90% | 0.000161 |
| Condensin complex subunit 3                           | Q9BPX3 | NCAPG   | 114 | 2 | 2.50% | 0.00016  |
| Ankyrin repeat domain-containing protein 17           | O75179 | ANKRD17 | 274 | 4 | 7.20% | 0.000156 |
| Importin-7                                            | O95373 | IPO7    | 120 | 2 | 2.80% | 0.000156 |
| Sarcoplasmic/endoplasmic reticulum calcium ATPase 2   | P16615 | ATP2A2  | 115 | 2 | 2.70% | 0.000156 |
| FACT complex subunit SPT16                            | Q9Y5B9 | SUPT16H | 120 | 2 | 2.60% | 0.000155 |
| Kinesin-like protein KIF11                            | P52732 | KIF11   | 119 | 2 | 2.50% | 0.000154 |
| Gem-associated protein 4                              | P57678 | GEMIN4  | 120 | 2 | 3.30% | 0.000153 |
| RNA-binding protein 27                                | Q9P2N5 | RBM27   | 119 | 2 | 2.90% | 0.000153 |
| Dedicator of cytokinesis protein 7                    | Q96N67 | DOCK7   | 243 | 4 | 4.00% | 0.000152 |
| Transcription initiation factor TFIID subunit 4       | O00268 | TAF4    | 110 | 2 | 2.60% | 0.00015  |
| E3 ubiquitin-protein ligase HUWE1                     | Q7Z6Z7 | HUWE1   | 482 | 8 | 3.70% | 0.000148 |
| Protogenin                                            | Q2VWP7 | PRTG    | 127 | 2 | 5.50% | 0.000141 |
| DNA-directed RNA polymerase II subunit RPB2           | P30876 | POLR2B  | 134 | 2 | 3.20% | 0.000138 |
| Structural maintenance of chromosomes protein 2       | O95347 | SMC2    | 136 | 2 | 2.00% | 0.000136 |
| Structural maintenance of chromosomes protein 3       | Q9UQE7 | SMC3    | 142 | 2 | 2.50% | 0.000133 |
| Isoleucine--tRNA ligase, cytoplasmic                  | P41252 | IARS1   | 145 | 2 | 1.70% | 0.000129 |
| Protein flightless-1 homolog                          | Q13045 | FLII    | 145 | 2 | 1.90% | 0.000128 |
| Ataxin-2                                              | Q99700 | ATXN2   | 140 | 2 | 2.70% | 0.000124 |
| C-Jun-amino-terminal kinase-interacting protein 4     | O60271 | SPAG9   | 146 | 2 | 3.60% | 0.000123 |
| Sister chromatid cohesion protein PDS5 homolog A      | Q29RF7 | PDS5A   | 151 | 2 | 2.50% | 0.000121 |
| Host cell factor 1                                    | P51610 | HCFC1   | 209 | 3 | 2.40% | 0.00012  |
| THO complex subunit 2                                 | Q8NI27 | THOC2   | 183 | 2 | 2.00% | 0.000102 |
| Kinesin-like protein KIF21B                           | O75037 | KIF21B  | 183 | 2 | 5.10% | 9.91E-05 |
| Probable ubiquitin carboxyl-terminal hydrolase FAF-X  | Q93008 | USP9X   | 290 | 3 | 1.40% | 9.53E-05 |
| A-kinase anchor protein 12                            | Q02952 | AKAP12  | 191 | 2 | 3.20% | 9.11E-05 |
| eIF-2-alpha kinase activator GCN1                     | Q92616 | GCN1    | 293 | 3 | 1.70% | 9.11E-05 |
| E3 ubiquitin-protein ligase RBBP6                     | Q7Z6E9 | RBBP6   | 202 | 2 | 2.10% | 9.06E-05 |
| Proteasome adapter and scaffold protein ECM29         | Q5VYK3 | ECPAS   | 204 | 2 | 4.10% | 0.000088 |
| Ankyrin repeat domain-containing protein 36A          | A6QL64 | ANKRD36 | 215 | 2 | 2.00% | 8.47E-05 |



|                                    |        |          |     |   |       |          |
|------------------------------------|--------|----------|-----|---|-------|----------|
| Rho GTPase-activating protein 21   | Q5T5U3 | ARHGAP21 | 217 | 2 | 2.20% | 8.29E-05 |
| Protein PRRC2B                     | Q5JSZ5 | PRRC2B   | 243 | 2 | 1.70% | 7.28E-05 |
| Filamin-B                          | O75369 | FLNB     | 278 | 2 | 1.70% | 6.24E-05 |
| Teneurin-3                         | Q9P273 | TENM3    | 301 | 2 | 2.40% | 6.01E-05 |
| E3 ubiquitin-protein ligase UBR5   | O95071 | UBR5     | 309 | 2 | 1.80% | 0.000058 |
| Dynein heavy chain 6, axonemal     | Q9C0G6 | DNAH6    | 476 | 2 | 1.30% | 0.000039 |
| Cytoplasmic dynein 1 heavy chain 1 | Q14204 | DYNC1H1  | 532 | 2 | 1.00% | 3.49E-05 |
