# Supplementary material
Source: PubMed Central journal article supplement (PMC10192046)
Supplement: NIHMS1885021-supplement-Supplementary_7.pdf [file NIHMS1885021-supplement-Supplementary_7.pdf]

**Supporting Table 5:****Perturbed IRGs in sAH livers (DbGaP\_phs001807: including sAH and AH\_Expl; fold change > 2), related to Supporting Fig. 1**

| <b>Upregulated (958 genes)</b> | <b>Downregulated (468 genes)</b> |
|--------------------------------|----------------------------------|
| CREB3L1                        | COBLL1                           |
| B3GNT5                         | USP30                            |
| PNMA1                          | MT1B                             |
| MMP2                           | GPHN                             |
| ABCA3                          | BBOX1                            |
| FAM219A                        | KLHL13                           |
| INSL3                          | XDH                              |
| AP000295.9                     | GCSH                             |
| KIF26B                         | MYO1B                            |
| UGCG                           | PRADC1                           |
| BTG2                           | CXCL14                           |
| CHST8                          | GSTA1                            |
| HSPB1                          | FAM214A                          |
| MEF2D                          | CYP39A1                          |
| PFKP                           | C1R                              |
| ZPLD1                          | C1RL                             |
| PRTG                           | HMGCS2                           |
| CNTD2                          | DEPDC7                           |
| HSPB6                          | AQP9                             |
| NCF4                           | LDHD                             |
| SLC7A6                         | MREG                             |
| TMSB10                         | ITLN1                            |
| CXCL3                          | MET                              |
| PLAU                           | GALK1                            |
| EPB41L4A                       | CLRN1                            |
| NTRK1                          | PCSK1                            |
| CTNND2                         | SORL1                            |
| FRAS1                          | SERPINF1                         |
| ANXA1                          | SFXN2                            |
| MMP7                           | PRDX6                            |
| TC2N                           | AMBP                             |
| DEPDC1B                        | ACSM3                            |
| TICAM1                         | RP11-249C24.11                   |
| MSC                            | SMO                              |
| DTNBP1                         | CA14                             |
| CACNA2D1                       | LYZL1                            |
| CCDC88B                        | RMDN2                            |
| SOD2                           | MACROD1                          |
| ARRDC2                         | ACAT1                            |
| KCNF1                          | C1QTNF3                          |
| PKP1                           | ALDOC                            |
| FGR                            | CALML4                           |
| AATK                           | GHR                              |

|               |              |
|---------------|--------------|
| FHL3          | CLEC1B       |
| NETO2         | ST3GAL1      |
| RAB3IP        | STARD5       |
| BAK1          | GBP7         |
| PTPRE         | RBBP9        |
| UNC5B         | AC034228.7   |
| MRPS31P3      | DPP4         |
| MFSD6         | IL17RC       |
| ALPK3         | FOLH1        |
| SLC9A5        | EXOSC7       |
| BIK           | ANGPTL3      |
| RAB3C         | MAOA         |
| SH3RF3        | ALDH2        |
| ALOX5         | RP11-568A7.1 |
| VSTM2L        | CEACAM20     |
| RP11-447L10.1 | CNKSR3       |
| CHSY1         | FRRS1        |
| VEPH1         | NTHL1        |
| GPNMB         | MRPL12       |
| ITGA3         | GCSHP5       |
| SLC12A4       | PGA4         |
| AKAP7         | ACBD5        |
| PTPN12        | TNFSF10      |
| S1PR2         | UGT2B15      |
| RUNX3         | DNASE1L3     |
| TGM2          | ADI1         |
| FCGR2B        | JAKMIP2      |
| PDLIM7        | SCP2         |
| ARL14         | PKLR         |
| CLDN11        | GNG5         |
| RELT          | GPD1         |
| APOBR         | PCK2         |
| IQCF2         | TF           |
| ANXA3         | GNG10        |
| EPHA2         | CRHBP        |
| RGS3          | ALAD         |
| ZMYND15       | ZIM2         |
| ABHD4         | NIPSNAP1     |
| NFATC1        | EBPL         |
| COL1A1        | IGFALS       |
| PLK3          | LTBP1        |
| TMCO3         | VSNL1        |
| SEL1L3        | SDC2         |
| CMIP          | CFH          |
| ATF3          | OR13C4       |
| UCHL1         | SLC38A4      |
| EPHX3         | ACADL        |

|               |              |
|---------------|--------------|
| PRR16         | SLC47A1      |
| DGKH          | CLEC3B       |
| RP11-204C16.4 | RAB26        |
| PLP2          | IDNK         |
| TAGLN2        | PLCXD2       |
| GFPT2         | TNNC1        |
| FOXJ1         | FADS2        |
| ITGB4         | CYP4F3       |
| RP1-239B22.5  | CYP7A1       |
| ABR           | AHCY         |
| NCOR2         | MTTP         |
| RIPK4         | SRD5A2       |
| MAGEE1        | KHK          |
| PCDHA4        | CNGA1        |
| FBLIM1        | ECM1         |
| LAIR1         | AKR7A3       |
| DUSP4         | ABHD15       |
| HS3ST1        | DHFR         |
| PLTP          | CPB2         |
| ROR2          | ANXA9        |
| CHST1         | NR1I3        |
| MYO6          | CYP4A22      |
| COL15A1       | FCN2         |
| ATP11A        | SULT1A2      |
| PLEKHB1       | HP           |
| FABP5P2       | MT1G         |
| KIAA1211L     | TM7SF2       |
| F2RL1         | POLD2        |
| HBEGF         | CYP2A6       |
| OSMR          | BNIP3        |
| FOXC1         | SLCO1B7      |
| SOD3          | MTHFD1       |
| RASAL1        | IL13RA2      |
| HYOU1         | CYP3A5       |
| SLC16A5       | SIM1         |
| CSF1          | HPR          |
| SORT1         | GPR158       |
| FNDC1         | ALDH6A1      |
| FAM98B        | NDRG2        |
| MGAT5         | PRKAB2       |
| NFKB2         | GDF2         |
| MRAP2         | ANO1         |
| C2orf27A      | BNIP3P1      |
| TMEM156       | HAGH         |
| FAM102B       | RP11-612B6.2 |
| SH2B2         | SULT1A1      |
| SBNO2         | HOGA1        |

|              |               |
|--------------|---------------|
| BDKRB1       | TIGD2         |
| SLC6A6       | AKR7A2        |
| DUSP5        | CXCR2P1       |
| C12orf75     | AKR1C4        |
| PIK3CB       | DBT           |
| MYH9         | COQ10A        |
| CDS1         | MPC2          |
| SLCO3A1      | PGM1          |
| TNFSF15      | ADRA1B        |
| NCF2         | NUDT6         |
| ADAM19       | ASPA          |
| RAP1GAP      | MMACHC        |
| FUS          | MYCL          |
| CHST11       | PHGDH         |
| ADRA2A       | F2            |
| BCL9         | PCYOX1        |
| ADAMTS9      | CFHR1         |
| STMN3        | SULT2A1       |
| TMEM200A     | SAT2          |
| B3GALT5      | CBS           |
| ZFP69B       | GAMT          |
| IFITM5       | DPYS          |
| SRPK3        | TSPAN33       |
| BAMBI        | DHTKD1        |
| CTC-479C5.17 | SLC16A2       |
| REC8         | RRS1          |
| FAT2         | SMPDL3A       |
| GBGT1        | CYP2E1        |
| RHBDF1       | DNAJC25       |
| C3orf52      | DNAJC25-GNG10 |
| DLGAP4       | USP18         |
| GATAD2A      | NET1          |
| ARHGEF2      | ESR1          |
| BACE2        | KLF12         |
| OXTR         | SLCO1B1       |
| SLITRK4      | RUNDC3B       |
| IFFO2        | GPX4          |
| IGFBP7       | CYP2A13       |
| CACNB1       | CCT6B         |
| SCN4A        | IL1RAP        |
| TMEM87B      | ZKSCAN1       |
| FAM135A      | ACSL5         |
| FUT6         | ANG           |
| NCAM1        | DMGDH         |
| DEGS2        | ADRB2         |
| PDP1         | HPGD          |
| FERMT3       | DNAJC12       |

|            |               |
|------------|---------------|
| FLNC       | MFAP3L        |
| PRAF2      | PER3          |
| NACAD      | AC074182.1    |
| SPTAN1     | AMACR         |
| TMEM125    | ITPR2         |
| NCEH1      | CYP4A11       |
| RNF113B    | THRSP         |
| TM6SF1     | OSBPL6        |
| DSG2       | PHYH          |
| FUT4       | ART4          |
| JAG1       | GNG5P2        |
| DMPK       | RXFP1         |
| PAPPA      | SERPINF2      |
| KIF2A      | RNPC3         |
| VSIG10L    | RP11-315D16.2 |
| PRKCD      | SPIC          |
| POM121L10P | LONP2         |
| ITPRIPL2   | ZFP1          |
| ADAMTS2    | CTSF          |
| CRHR2      | AADAT         |
| ENAH       | KLHDC2        |
| IL1RL1     | APOM          |
| PLXNC1     | SHMT1         |
| RGS19      | IL27          |
| LILRA6     | PIN4          |
| AC068491.1 | ALDH5A1       |
| THSD1      | ACADS         |
| SLC12A2    | CPED1         |
| CD58       | ECI2          |
| OR2A9P     | EPHX2         |
| RLN1       | BLVRB         |
| WIPF3      | IVD           |
| HOXA3      | AC125232.1    |
| LITAF      | EBP           |
| DNAAF1     | FAM13A        |
| AC093724.2 | PROC          |
| TMEM165    | ACSM5         |
| KRT15      | GRIN3A        |
| IL18BP     | PHLPP1        |
| CDH24      | PLIN1         |
| KIAA1549L  | PDIA5         |
| KRT17      | SLC7A2        |
| ABCC4      | RP11-1084J3.4 |
| CBX6       | FH            |
| ELOVL7     | TUBE1         |
| GPR132     | ARHGAP20      |
| PIM1       | NR3C2         |

|               |               |
|---------------|---------------|
| FAM169A       | QRSL1P1       |
| THBD          | DIRAS3        |
| YWHAZ         | RXRG          |
| PGM2L1        | ETNPPL        |
| PAQR4         | PIK3R4        |
| ARNTL2        | SIGIRR        |
| BHLHE22       | SULT1E1       |
| MYBPH         | DBP           |
| TRAF2         | CCL23         |
| AC000403.1    | SYT1          |
| SERINC2       | ABCG2         |
| FLOT2         | C1S           |
| MICALL1       | DPF3          |
| CTD-2262B20.1 | INS           |
| OXCT1         | BDH1          |
| LTBP2         | ECM2          |
| GABBR1        | FCGRT         |
| FAM222B       | RMND5A        |
| LAMB3         | FITM1         |
| PDE9A         | CNTLN         |
| RRAD          | CTD-2008A1.2  |
| FMN1          | SLC10A1       |
| ZNF738        | ACADM         |
| RALGPS1       | CYP4X1        |
| CYP19A1       | CDC14B        |
| CLDN9         | PGRMC1        |
| TRIM40        | MAOB          |
| EPS8L1        | CR1L          |
| HOXB5         | MYOM2         |
| KSR1          | ACOT13        |
| S100A3        | RANBP3L       |
| TRPV2         | RP4-583P15.15 |
| KCTD10        | CYP1A2        |
| SLC9A7        | UROC1         |
| YWHAH         | SFXN1         |
| IL17D         | GSTM1         |
| CTAGE6        | LIME1         |
| FABP5P11      | ANXA10        |
| TUFT1         | SERPINA7      |
| EHBP1L1       | RP11-125O5.2  |
| MYOF          | STARD10       |
| MFSD2A        | SOX5          |
| ZC3H12A       | ADHFE1        |
| VANGL2        | DCAF6         |
| FA2H          | GYS2          |
| STC1          | CD5L          |
| SEMA3G        | NDST3         |

|            |               |
|------------|---------------|
| C1orf198   | ABCA6         |
| EEPD1      | LIFR          |
| COL23A1    | CMC2          |
| NEDD4L     | PLGLB2        |
| GLDN       | CYP4F2        |
| AMELX      | PGA3          |
| GAS2L3     | SIRT5         |
| CD248      | MSRB2         |
| GLB1L2     | ARRDC3        |
| PDGFD      | SLX1B-SULT1A4 |
| CTAGE9     | SRD5A1        |
| BEX2       | HINT2         |
| ZYX        | CFL2          |
| LXN        | UPB1          |
| GMIP       | LST3          |
| CHST4      | NAAA          |
| SCRN1      | CYP27A1       |
| ITGB6      | AGL           |
| TMC8       | CCNG1         |
| TANC2      | AZGP1         |
| CADPS      | CLU           |
| ANO2       | HSD3B2        |
| SPATA12    | ACAT2         |
| ANXA8      | HADH          |
| AL626787.1 | TRPM1         |
| FGFR2      | ST8SIA3       |
| ITGAV      | EPHX1         |
| THY1       | SULT1A3       |
| LZTS1      | NR5A2         |
| P2RY8      | AVPR1A        |
| ARHGEF3    | TOM1L1        |
| HSPA2      | EHD3          |
| HSD3B1     | PVALB         |
| TNNI2      | UNC93A        |
| SAMD1      | ABAT          |
| C5orf46    | DGAT2         |
| FAM167A    | ACSL1         |
| OSBPL3     | CPNE6         |
| DPYSL4     | SNRNP25       |
| ADAMTS14   | ACAA1         |
| ANTXR1     | CTSL          |
| HSPA6      | CA2           |
| RAB6B      | GPER1         |
| BICD1      | RALGPS2       |
| SLC25A29   | EIF4EBP1      |
| SPHK1      | NTF3          |
| SLAMF8     | SORD          |

|             |            |
|-------------|------------|
| SPP1        | AMDHD1     |
| BARD1       | TMEM97     |
| SMCO2       | AC079780.3 |
| ADAM9       | USP41      |
| CA9         | MRPL40     |
| APAF1       | SMIM14     |
| KCNC3       | SLC41A2    |
| POM121L9P   | CYP51A1    |
| GPR176      | ANGPTL6    |
| PTGS2       | CETP       |
| OLR1        | RPS3AP5    |
| SEZ6L2      | GOLIM4     |
| GLIPR2      | GPAM       |
| CYTH2       | AFMID      |
| MAP1A       | BRINP2     |
| MYO5A       | SEC14L2    |
| AC008132.13 | MBNL3      |
| BCAR1       | SSTR1      |
| SIPA1L3     | PGA5       |
| GNA15       | ENO3       |
| TMEM185B    | CMBL       |
| KIAA0753    | PEG3       |
| TREML4      | TRMT10A    |
| AGPAT4      | MPDZ       |
| NOX4        | ITIH1      |
| NBEAP3      | PLG        |
| VWF         | DHRS4      |
| CD200       | ZMYND12    |
| NCKAP5L     | SLC25A10   |
| TPM1        | SLC13A5    |
| IL18        | SLC39A8    |
| ITGA6       | TSLP       |
| GAD2        | CENPV      |
| BAG3        | PLGLB1     |
| CRIM1       | FAM162A    |
| SULF2       | FGFBP2     |
| TRPM2       | CDH23      |
| NRG2        | DCXR       |
| SEMA7A      | HAAO       |
| BMP2        | AKR1C1     |
| SPTBN5      | ADH1B      |
| ACLY        | PEMT       |
| DAPK2       | SARDH      |
| EREG        | NIT2       |
| SFRP4       | CAT        |
| KCTD17      | GEMIN8P4   |
| TCTEX1D2    | AMY2B      |



|           |               |
|-----------|---------------|
| MCAM      | DIO1          |
| TMOD2     | SLC6A12       |
| CTAGE4    | CACYBP        |
| FMOD      | GCAT          |
| FAM155A   | ACSL6         |
| PTP4A3    | ENPP1         |
| PODXL     | NREP          |
| TNS1      | TMEM120A      |
| FAM122B   | CCDC150       |
| NDOR1     | SLC2A2        |
| TDRD9     | FAXDC2        |
| ITGB8     | PEX11A        |
| TPRN      | PIK3R1        |
| GAP43     | GBA3          |
| LENG8     | CLEC4G        |
| RALGDS    | HSBP1L1       |
| PTX3      | AGMO          |
| TNFRSF10C | RP11-468E2.6  |
| TMC6      | IDH1          |
| GXYLT2    | PEX19         |
| CDKN2B    | PPP1R3C       |
| CDR2L     | KMO           |
| LIMS1     | RNF130        |
| PIK3CD    | GFRA1         |
| CDH11     | ST13          |
| TGFB1     | SLC27A2       |
| ITGA2     | TCEA3         |
| GLI3      | HAX1          |
| PTCH1     | CFHR3         |
| S100A6    | G6PC          |
| COX19     | MARCO         |
| TES       | C2orf42       |
| FZD10     | AGXT          |
| RAB36     | LCAT          |
| SLC37A1   | AMT           |
| TNFRSF8   | F12           |
| MLLT3     | TDO2          |
| SOCS3     | HSD11B1       |
| TMEM132A  | AKR1C3        |
| HAVCR1    | DHRS1         |
| NIPAL2    | HIBADH        |
| SHC3      | RP11-351I24.3 |
| ARRDC4    | LYZL2         |
| KDEL3     | IGFBP3        |
| KLHL25    | C4BPA         |
| ZG16B     | ALB           |
| PIEZO1    | HAMP          |

|                |              |
|----------------|--------------|
| LAMA3          | CYB5A        |
| BGN            | N4BP2L1      |
| ALDOA          | TEX30        |
| SLC30A2        | KCTD3        |
| LFNG           | ING1         |
| LASP1          | RP11-166N6.3 |
| SPATS2         | SMIM2        |
| TMEM184B       | RELN         |
| RAB4B          | ACOX2        |
| ARHGAP23       | AC093616.4   |
| ABHD17C        | STAB2        |
| KIF5C          | AR           |
| MSANTD3-TMEFF1 | GATM         |
| HEG1           | CYP51P2      |
| KRT81          | EPB41L5      |
| ZC2HC1A        | CYP2J2       |
| AMPD3          | SCG5         |
| RAB4B-EGLN2    | AL163636.6   |
| SFXN3          | MTFR1L       |
| B9D2           | SLCO4C1      |
| S100A11        | AOX1         |
| ZNF521         | LRRD1        |
| COL13A1        | FDPS         |
| RAP2B          | SERPINA5     |
| COL8A1         | CALML6       |
| ZSWIM4         | SLC17A8      |
| TARBP1         | AMHR2        |
| LPAR2          | SELENBP1     |
| MEGF6          | HSD17B6      |
| ANGPT1         | EHHADH       |
| SPRED3         | HEPACAM      |
| STK39          | TTC38        |
| KCNQ1          | CES1         |
| LIMK2          | PIPOX        |
| MMP24          | TMEM256      |
| MVP            | APOC1        |
| NR2F2          | RNASE4       |
| CD109          | SLC27A5      |
| RP11-64P12.8   | ACSM2B       |
| SLC25A24       | AMER1        |
| BSG            | ATF7IP2      |
| LYPD1          | POLD2P1      |
| TEAD4          | BCKDHB       |
| ADAMTS12       | PAH          |
| CREB5          | C9           |
| EFEMP1         | PNP          |
| IL9RP3         | ACY3         |

|             |        |
|-------------|--------|
| PCSK1N      | NADK2  |
| IGSF21      | IQGAP2 |
| ECT2        |        |
| FMNL1       |        |
| SMOC2       |        |
| CCDC74A     |        |
| POM121L7    |        |
| ZNF618      |        |
| VDR         |        |
| DNAJC6      |        |
| CDK18       |        |
| CLOCK       |        |
| PPARD       |        |
| ANXA2       |        |
| LRFN4       |        |
| JAG2        |        |
| ITGAM       |        |
| STX3        |        |
| CD34        |        |
| CCDC102B    |        |
| RHOQP1      |        |
| PDPN        |        |
| MST1R       |        |
| ACYP1       |        |
| VASH2       |        |
| CACNA1C     |        |
| COL3A1      |        |
| ENG         |        |
| MGAM        |        |
| MOB3A       |        |
| KIAA1324L   |        |
| S100A11P2   |        |
| FAM3C       |        |
| PRKAA2      |        |
| ADARB1      |        |
| SGPP2       |        |
| PLBD2       |        |
| AP1S3       |        |
| CCL11       |        |
| GPC4        |        |
| SOGA1       |        |
| COL4A2      |        |
| ACSS1       |        |
| AF196779.12 |        |
| SRCAP       |        |
| PPP1R13L    |        |
| LUM         |        |

|              |  |
|--------------|--|
| GOLGA7B      |  |
| KB-1592A4.15 |  |
| UBASH3B      |  |
| AC025263.3   |  |
| SYNDIG1      |  |
| DTX2         |  |
| FCGR2A       |  |
| GRAMD1B      |  |
| TMED3        |  |
| TMEM158      |  |
| CCDC74B      |  |
| TMEM255B     |  |
| TSPAN15      |  |
| NPHP4        |  |
| TMEM155      |  |
| PML          |  |
| EFNA5        |  |
| U4           |  |
| TMEM51       |  |
| KMT2D        |  |
| LRR32        |  |
| TUBB2A       |  |
| DAB2         |  |
| MRAS         |  |
| LIMS3        |  |
| MARCKS       |  |
| B3GNT3       |  |
| SERPINH1     |  |
| PLD2         |  |
| F13A1        |  |
| KRT80        |  |
| DNAH7        |  |
| MN1          |  |
| ANO4         |  |
| PCDHA5       |  |
| ALOX15B      |  |
| CD24         |  |
| PIK3C2B      |  |
| FAP          |  |
| ARX          |  |
| HTR2B        |  |
| SLC44A3      |  |
| TMSB15B      |  |
| STX1A        |  |
| TGFB3        |  |
| IRAK2        |  |
| SERPINE2     |  |

|              |  |
|--------------|--|
| YWHAZP3      |  |
| BTC          |  |
| SLC36A1      |  |
| PLCB4        |  |
| RAI1         |  |
| ATP9A        |  |
| SNPH         |  |
| PYGB         |  |
| HIC1         |  |
| ADPRH        |  |
| ALOX5AP      |  |
| NOD1         |  |
| PIWIL4       |  |
| RIPK3        |  |
| GPR27        |  |
| SH3PXD2B     |  |
| GNAZ         |  |
| SPRY1        |  |
| LILRB3       |  |
| SPI1         |  |
| IL9R         |  |
| MMP14        |  |
| PSORS1C1     |  |
| AK8          |  |
| MDM2         |  |
| ITGBL1       |  |
| AC124309.1   |  |
| TBC1D30      |  |
| FMNL3        |  |
| LRCH2        |  |
| MAML1        |  |
| NQO1         |  |
| ADAM28       |  |
| CPXM1        |  |
| CARD10       |  |
| AC244230.1   |  |
| KCNAB2       |  |
| GPR4         |  |
| SPNS2        |  |
| PACS1        |  |
| CIC          |  |
| SYT3         |  |
| RP11-934B9.3 |  |
| CAPN2        |  |
| HCN2         |  |
| SRPX2        |  |
| CBR3         |  |

|               |  |
|---------------|--|
| RAB3B         |  |
| ADORA1        |  |
| TTC39A        |  |
| DAB2IP        |  |
| PLEKHN1       |  |
| MIR4689       |  |
| ST6GALNAC4    |  |
| FGF9          |  |
| TSC22D2       |  |
| DOK3          |  |
| OSBPL7        |  |
| FUT3          |  |
| SLC22A15      |  |
| SOGA3         |  |
| SLC2A6        |  |
| JUNB          |  |
| OR2A20P       |  |
| RP11-738E22.2 |  |
| ARMC9         |  |
| ASIC2         |  |
| CCDC80        |  |
| SSH1          |  |
| IGDCC4        |  |
| TMEM190       |  |
| MPHOSPH6      |  |
| MARK2         |  |
| GRM5          |  |
| NKD2          |  |
| SH3D21        |  |
| TMC5          |  |
| SKI           |  |
| CAPN11        |  |
| FCGR2C        |  |
| FAIM          |  |
| DBNDD1        |  |
| G6PD          |  |
| KLF5          |  |
| EHD4          |  |
| FBLN2         |  |
| OXGR1         |  |
| FAR1          |  |
| SOX8          |  |
| NRGN          |  |
| TNFAIP8       |  |
| C11orf80      |  |
| PPP1R36       |  |
| F2R           |  |

|            |  |
|------------|--|
| LPCAT4     |  |
| BCL2L1     |  |
| RAB3IL1    |  |
| TUBA1C     |  |
| LHX6       |  |
| NAV1       |  |
| AEBP1      |  |
| RAI2       |  |
| TXNRD1     |  |
| PAQR5      |  |
| SRGAP1     |  |
| TNFRSF21   |  |
| CDC42EP5   |  |
| ANKRD2     |  |
| CCL28      |  |
| HPDL       |  |
| TMEM164    |  |
| SLC9A1     |  |
| PDE7A      |  |
| AKR1B1     |  |
| CD300LB    |  |
| RASL11B    |  |
| THBS2      |  |
| PLEC       |  |
| C15orf39   |  |
| UNC13A     |  |
| SHB        |  |
| MPZL3      |  |
| MYCN       |  |
| MAPK13     |  |
| MTHFD1L    |  |
| S100A2     |  |
| CASZ1      |  |
| KCNK15     |  |
| ANKRD29    |  |
| PPP1R9B    |  |
| SLC43A2    |  |
| HOXB6      |  |
| SLC25A33   |  |
| C5orf30    |  |
| AL391319.1 |  |
| GAL3ST4    |  |
| BICC1      |  |
| RASD1      |  |
| MACC1      |  |
| DBN1       |  |
| MFAP2      |  |

|             |  |
|-------------|--|
| OXCT2       |  |
| ADAP1       |  |
| LDLRAD3     |  |
| PTCHD4      |  |
| EID3        |  |
| LY6H        |  |
| HTRA1       |  |
| MAP2        |  |
| SLC26A2     |  |
| ATP2B4      |  |
| SUSD4       |  |
| TGFA        |  |
| PROM1       |  |
| VSX1        |  |
| PHLDA2      |  |
| PADI2       |  |
| ILDR1       |  |
| RNF24       |  |
| TTC22       |  |
| GPX8        |  |
| RHOQ        |  |
| TP53I11     |  |
| ST14        |  |
| TMEM144     |  |
| RHBDF2      |  |
| SPON2       |  |
| ITGAX       |  |
| CANT1       |  |
| MGAT4A      |  |
| LRRC8B      |  |
| RAB11FIP1   |  |
| COX7A1      |  |
| OLFML2B     |  |
| ODC1        |  |
| PCDH17      |  |
| KLHL29      |  |
| CLIP4       |  |
| AC024592.12 |  |
| DPEP1       |  |
| MAP9        |  |
| MECOM       |  |
| HIP1R       |  |
| LRRC1       |  |
| TWIST2      |  |
| ACTB        |  |
| GAS1        |  |
| ESRP1       |  |



|             |  |
|-------------|--|
| KRT19       |  |
| TMEM163     |  |
| SLC35G2     |  |
| STK32B      |  |
| RAP2A       |  |
| TTYH1       |  |
| COL4A1      |  |
| RNASE1      |  |
| SLFN11      |  |
| MAP1B       |  |
| EXTL1       |  |
| ACTBP8      |  |
| RP11-37C7.1 |  |
| RARG        |  |
| GLS         |  |
| FBXL16      |  |
| IL4R        |  |
| ADAM8       |  |
| LINC00152   |  |
| MNT         |  |
| MAGEL2      |  |
| TM4SF1      |  |
| JUP         |  |
| CTBP2       |  |
| SLC41A1     |  |
| DZIP1L      |  |
| FABP5P7     |  |
| GLRB        |  |
| LOX         |  |
| SULF1       |  |
| KIF3A       |  |
| MAGED4      |  |
| PTGFRN      |  |
| SUCO        |  |
| C6orf132    |  |
| DUTP1       |  |
| TNFAIP2     |  |
| DAGLA       |  |
| FERMT1      |  |
| SLC38A1     |  |
| MMD         |  |
| LPL         |  |
| CLEC2D      |  |
| RPS6KA1     |  |
| HCN4        |  |
| PLCD3       |  |
| SLC7A1      |  |

|         |  |
|---------|--|
| PKM     |  |
| LAMC2   |  |
| JAK3    |  |
| SPSB1   |  |
| CXCL5   |  |
| AP1M2   |  |
| FAM78B  |  |
| RARRES1 |  |
| CLEC5A  |  |
| B3GNTL1 |  |
| MMP25   |  |
| SCNN1A  |  |
| GCNT3   |  |
| SLC35F2 |  |
| ZMIZ1   |  |
| CTAGE8  |  |
| FSTL3   |  |
| TOR4A   |  |
| NPTX1   |  |
| DOK5    |  |
| ADCY4   |  |
| PKDCC   |  |
| CSTB    |  |
| SLC6A9  |  |
| FGD3    |  |
| CUEDC1  |  |
| TMEFF1  |  |
| PDLIM3  |  |
| GPRIN3  |  |
| MYO1G   |  |
| KCNQ3   |  |
| ELMSAN1 |  |
| GMNN    |  |
| NES     |  |
| SEMA4A  |  |
| CDCP1   |  |
| NUAK2   |  |
| ANO8    |  |
| GPX3    |  |
| KLC2    |  |
| YBX3    |  |
| PLB1    |  |
| LMCD1   |  |
| MICAL1  |  |
| MICALL2 |  |
| ABCC1   |  |
| NPM1P5  |  |

|               |  |
|---------------|--|
| BCL3          |  |
| MUC13         |  |
| RHOQP3        |  |
| TOMM40        |  |
| KCND2         |  |
| LTC4S         |  |
| FUT5          |  |
| CST2          |  |
| PPP1R14C      |  |
| MTND4P14      |  |
| C11orf96      |  |
| CD24P4        |  |
| LCN2          |  |
| SOBP          |  |
| GMDS          |  |
| AC006483.1    |  |
| RP11-145F16.2 |  |
| KCTD12        |  |
| CLEC11A       |  |
| ANKRD1        |  |
| DDR1          |  |
| PFKFB4        |  |
| PMEPA1        |  |
| TNFSF9        |  |
| PAGR1         |  |
| ZNF385A       |  |
| KIF21B        |  |
| TREM1         |  |
| KCNJ5         |  |
| LMNA          |  |
| ACTN1         |  |
| IFNAR2        |  |
| PRICKLE1      |  |
| SLIT2         |  |
| SEMA6B        |  |
| BSPRY         |  |
| CTHRC1        |  |
| PIK3R6        |  |
| ELK3          |  |
| ANKRD13D      |  |
| DENND6B       |  |
| BCAT1         |  |
| AHNAK2        |  |
| GNA12         |  |
| ETV6          |  |
| B4GALT5       |  |
| MMP19         |  |

|              |  |
|--------------|--|
| FMNL2        |  |
| GEM          |  |
| KRBA1        |  |
| TM4SF19      |  |
| TESC         |  |
| TTC9         |  |
| NOTCH3       |  |
| APBB1IP      |  |
| MMP10        |  |
| TNFSF14      |  |
| PRRT2        |  |
| FAM3C2       |  |
| ATP1B3       |  |
| TRNP1        |  |
| NUP62        |  |
| WNT7B        |  |
| PLAUR        |  |
| MAP2K3       |  |
| ARHGEF10     |  |
| BHLHE41      |  |
| FJX1         |  |
| AMELY        |  |
| CLCF1        |  |
| SH2D5        |  |
| CCDC112      |  |
| MAP7D1       |  |
| HSPG2        |  |
| RASSF6       |  |
| LPCAT1       |  |
| FLNA         |  |
| TRAM1L1      |  |
| AAK1         |  |
| COL1A2       |  |
| MTND5P14     |  |
| RP4-798C17.6 |  |
| SIK1         |  |
| MTMR11       |  |
| USH1C        |  |
| DNAH5        |  |
| SUSD1        |  |
| GGT5         |  |
| ARSJ         |  |
| ARHGAP27     |  |
| NR1D1        |  |
| KCNS3        |  |
| RNF44        |  |
| SEMA3C       |  |

|              |  |
|--------------|--|
| CYP1B1       |  |
| CSF2RB       |  |
| OXCT2P1      |  |
| MS4A14       |  |
| TFAP2E       |  |
| DACT1        |  |
| TMEM54       |  |
| ACKR3        |  |
| C2CD4A       |  |
| NCR3LG1      |  |
| BAK1P1       |  |
| CDX1         |  |
| RP11-521I2.3 |  |
| N4BP3        |  |
| RANGAP1      |  |
| CKAP4        |  |
| PITPNM1      |  |
| ARNT2        |  |
| MOB3B        |  |
| NRSN2        |  |
| WDR63        |  |
| MLXIP        |  |
